# Supplementary material for: Prevalence and patterns of multimorbidity in Amazon Region of Brazil and associated determinants: a cross-sectional study
Source: PubMed Central journal article supplement — BMJ Open. 2018 Nov 3;8(11):e023398. doi: 10.1136/bmjopen-2018-023398 (PMC6231594; doi:10.1136/bmjopen-2018-023398), 2018-11-03
Supplement: bmjopen-2018-023398.draft_revisions.pdf [file bmjopen-2018-023398.draft_revisions.pdf]

# BMJ Open

BMJ Open is committed to open peer review. As part of this commitment we make the peer review history of every article we publish publicly available.

When an article is published we post the peer reviewers' comments and the authors' responses online. We also post the versions of the paper that were used during peer review. These are the versions that the peer review comments apply to.

The versions of the paper that follow are the versions that were submitted during the peer review process. They are not the versions of record or the final published versions. They should not be cited or distributed as the published version of this manuscript.

BMJ Open is an open access journal and the full, final, typeset and author-corrected version of record of the manuscript is available on our site with no access controls, subscription charges or pay-per-view fees (<http://bmjopen.bmj.com>).

If you have any questions on BMJ Open's open peer review process please email [info.bmjopen@bmj.com](mailto:info.bmjopen@bmj.com)

# BMJ Open

## Prevalence and patterns of multimorbidity and associated determinants: a cross-sectional study

|                               |                                                                                                                                                                                                                                                                                                                                                                                                                                                                                                                                          |
|-------------------------------|------------------------------------------------------------------------------------------------------------------------------------------------------------------------------------------------------------------------------------------------------------------------------------------------------------------------------------------------------------------------------------------------------------------------------------------------------------------------------------------------------------------------------------------|
| Journal:                      | <i>BMJ Open</i>                                                                                                                                                                                                                                                                                                                                                                                                                                                                                                                          |
| Manuscript ID                 | bmjopen-2018-023398                                                                                                                                                                                                                                                                                                                                                                                                                                                                                                                      |
| Article Type:                 | Research                                                                                                                                                                                                                                                                                                                                                                                                                                                                                                                                 |
| Date Submitted by the Author: | 04-Apr-2018                                                                                                                                                                                                                                                                                                                                                                                                                                                                                                                              |
| Complete List of Authors:     | Araujo, Elizete; University of Brasilia, Post-Graduate Program Health Sciences; Federal University of Amazonas, Getulio Vargas University Hospital<br>Silva, Marcus; Federal University of Amazonas, Faculty Medicine; Universidade de Sorocaba, Post-Graduate Program of Pharmaceutical Science<br>Galvao, Tais; State University of Campinas, Faculty of Pharmaceutical Sciences<br>Nunes, BP; Federal University of Pelotas, Department of Nursing in Public Health<br>Pereira, Mauricio; University of Brasilia, Faculty of Medicine |
| Keywords:                     | Prevalence, Multimorbidity, Cross-Sectional Studies, Population Surveys, Brazil                                                                                                                                                                                                                                                                                                                                                                                                                                                          |
|                               |                                                                                                                                                                                                                                                                                                                                                                                                                                                                                                                                          |

SCHOLARONE™  
Manuscripts

1  
2  
3 **Prevalence and patterns of multimorbidity and associated determinants: a cross-**  
4 **sectional study**

5  
6 Corresponding author

7  
8 Maria Elizete de Almeida Araujo

9  
10 Getulio Vargas University Hospital, Federal University of Amazonas, Manaus, Amazonas,  
11 Brazil, Street 04, number 04, Square I, Condominium Parque Aripuanã. Postal code  
12 69040613 Phone +55 (92) 35563374 E-mail: [elizetemanaus@gmail.com](mailto:elizetemanaus@gmail.com)  
13  
14  
15

16  
17 **Authors**

18 Maria Elizete de Almeida Araujo, Post-Graduate Program Health Sciences, University of  
19 Brasília, PhD

20 Getulio Vargas University Hospital, Federal University of Amazonas.

21  
22  
23 Marcus Tolentino Silva, Faculty of Medicine, Federal University of Amazonas, Manaus,  
24 Amazonas, Brazil, Assistant Professor.

25  
26  
27 Post-Graduate Program of Pharmaceutical Sciences, University of Sorocaba, Sorocaba, Sao  
28 Paulo, Brazil, Assistant Professor.

29  
30  
31 Tais Freire Galvao, Faculty of Pharmaceutical Sciences, State University of Campinas,  
32 Campinas, Sao Paulo, Brazil, Assistant Professor

33  
34  
35 Bruno P Nunes, Department of Nursing in Public Health, Federal University of Pelotas,  
36 Pelotas, Rio Grande do Sul, Brazil, Assistant Professor

37  
38  
39 Mauricio G. Pereira, Faculty of Medicine, University of Brasilia, Federal District, Brazil,  
40 Full Professor.

41 **Abbreviated running title:** Multimorbidity in Amazonas Region

42  
43 Word count: 2971

44 **ABSTRACT**

45  
46 **Objectives:** To estimate the prevalence of multimorbidity and to identify factors associated  
47 with it in the adult population from the metropolitan region of Manaus.

48  
49 **Design:** Cross-sectional population-based study.

50  
51 **Setting:** Interviews conducted between May and August of 2015 in eight cities that  
52 compose the metropolitan region of Manaus, Amazonas, Brazil.

53  
54  
55 **Participants:** 4000 adults aged  $\geq 18$  years  
56  
57  
58  
59  
60

**Primary outcome measures:** Multimorbidity, measured by the occurrence of  $\geq 2$  and  $\geq 3$  chronic diseases, was the primary outcome. The associated factors were investigated by calculating the prevalence ratio (PR) obtained by Poisson regression, with robust adjustment of the variance in a hierarchical model. A factor analysis was conducted to investigate multimorbidity clusters.

**Results:** Half of the interviewees were women. The presence of a chronic disease was reported by 57.2% (95% CI 56.6% to 59.7%) of the interviewees, and the mean morbidity was 1.2 (1.1-1.2); 29% (95% CI 27.6% to 30.5%) reported  $\geq 2$  morbidities, and 15% (95% CI 14.1% to 16.4%) reported  $\geq 3$  chronic conditions. Back pain was reported by one-third of the interviewees. Multimorbidity was higher in women PR = 1.7 (95% CI 1.5 to 1.8), the elderly, PR = 5.7 (95% CI 4.5 to 7.1) and individuals with worse health perception, PR = 3.7 (95% CI 2.7-5.0). Associated factors also included undergoing medical consultations, hospitalization in the last year, suffering from dengue in the last year and using a reference health service. Factor analysis revealed a pattern of multimorbidity in women, including cardiometabolic, musculoskeletal, respiratory, psychosomatic and cancer diseases. In men, an association was identified in two groups: the first included musculoskeletal, respiratory and psychosomatic diseases, and the second included cardiometabolic diseases.

**Conclusion:** Multimorbidity was frequent in the metropolitan region of Manaus. It occurred more in women, in the elderly and in those with worse health perception.

**Keywords:** Prevalence, Multimorbidity, Cross-Sectional Studies, Population Surveys, Brazil.

**Strengths and limitations of this study:**

This is the first study on the prevalence of multimorbidity in adults from the metropolitan region of Manaus, Amazonas state, Brazil, using data from a population-based survey. More than half of the adults from this region reported a chronic disease, and approximately 3 out of 10 interviewees reported  $\geq 2$  morbidities.

This research increases the knowledge about the epidemiologic factors associated with multimorbidity.

The measurement method of the outcome, self-report, is subject to errors and influenced by memory bias.

## BACKGROUND

Multimorbidity is the occurrence of different chronic clinical conditions in an individual, without a single condition being considered the main cause.<sup>1 2</sup> It is operationally defined as the occurrence of two or more chronic diseases.<sup>3-5</sup> In recent decades, population ageing, lifestyle changes, improved socio-economic conditions, and increased diagnostic ability of health services have contributed to a significant rise in the population that survives serious diseases, causing an accumulation of health problems in specific population groups. This situation has contributed to the increased prevalence of multimorbidity.<sup>6-8</sup>

The multimorbidity frequency varies according to the evaluated diseases, the age of the population, the individual's socioeconomic and demographic level, and the individual's health condition. The rising prevalence of multimorbidity has resulted in higher costs to health services.<sup>9-12</sup> The costs associated with multimorbidity can reach 75% of total health expenditures, which includes physician consultation, hospitalization, odontological care, medication and rehabilitation.<sup>13</sup>

In Brazil, the 2013 National Health Survey (*Pesquisa Nacional de Saúde*), including 64 308 individuals over 18 years old, has identified that the prevalence of multimorbidity was 26-29% in the southern region and 14-19% in the northern region.<sup>14</sup> The differences found suggest heterogeneity in economic development and greater use of health services. The systematic review conducted in 2016 included 27 studies and showed the southern region presented the highest increase of physical visit, while there was a reduction in the northern region.<sup>15</sup> These differences show the need for regional studies to expand our knowledge about multimorbidity at the local level.

The present research estimated the prevalence of and identified the factors associated with multimorbidity in the adult population of the metropolitan region of Manaus, the most populated region and largest economic cluster in northern Brazil.

## METHODS

### Study design

This is a cross-sectional population-based study in the metropolitan region of Manaus, composed by the capital of Amazonas, Manaus, and seven surrounding cities.

Multimorbidity was considered a primary outcome, which was categorized as  $\geq 2$  or  $\geq 3$  chronic diseases. The present analysis is part of a larger study, which aimed to study the use of health services and inputs in the region from May to August 2015.<sup>16</sup>

### **Participants and study size**

We calculated the sample size as 4,000 adults  $\geq 18$  years old to be interviewed, who were selected by probabilistic complex sampling—by cluster and stratified by sex and age—in three stages (census track, household and individual).<sup>16</sup> We assume an estimated 50% prevalence of use of health services, considering a CI of 95%, accuracy of 2% and a design effect value of 1.5.<sup>17</sup> We added 10% to compensate for possible losses and refusals.

### **Variables and data collection**

The primary outcome was self-reported multimorbidity, defined as two or more affirmative answers to any of the following questions: "Have any doctors ever diagnosed you with [...]?" [1] hypertension, [2] diabetes, [3] high cholesterol, [4] heart disease (heart attack, angina, heart failure or other), [5] stroke, [6] asthma or asthmatic bronchitis, [7] arthritis or rheumatism, [8] depression, [9] pulmonary disease (pulmonary emphysema, chronic bronchitis or chronic obstructive pulmonary disease), [10] cancer, or [11] chronic kidney disease, and [12] "Do you have any chronic spinal problems, such as chronic back or neck pain, low back pain, sciatic pain, vertebral or disc problems?"

The independent variables were sex; age; marital status; self-reported skin colour; education; social class;<sup>18</sup> occupation; private health insurance (yes, no); self-perception of health status; place of attendance (capital, countryside); using a reference health service, that is, use of the same healthcare professional for attendance (yes, no); physician visit in the last 12 months (yes, no); hospitalization in the last year (yes, no); malaria in the last 12 months (yes, no); dengue in the last 12 months (yes, no); and types of services one usually seeks when in need of medical care (primary, secondary, or tertiary).

Interviewers with experience in conducting home interviews collected the data on a mobile electronic device (Samsung® Galaxy Tab3 SM-T110). Interview records were transmitted over the Internet and stored using Survey To Go software (Dooblo Ltd., Israel).

### **Statistical analyses**

Statistical analyses were carried out in Stata v. 14.2. In all calculations, the complex sampling design was weighted by incorporating sample weights (*svy* command).

1  
2  
3 Descriptive statistics were initially obtained through prevalence calculation. The  
4 respective confidence intervals and P values of difference were calculated by Pearson's chi-  
5 square between sociodemographic characteristics and multimorbidity. The prevalence of  
6 the most common diseases stratified by sex, age group and multimorbidity was also  
7 calculated. At this stage, morbidities with a prevalence of <5% were excluded.  
8  
9

10  
11 Bivariate analyses were performed between all independent and dependent variables  
12 to calculate prevalence ratios (PRs) and 95% confidence intervals (CIs). To identify the  
13 factors associated with multimorbidity, PRs were adjusted using Poisson regression with  
14 robust variance adjustment.<sup>19-21</sup>  
15  
16

17  
18 A hierarchical model consisting of three blocks was constructed of the most distal to  
19 the most proximal determinants of multimorbidity: (1) demographic variables (sex, age,  
20 race, marital status); (2) socioeconomic variables (economic, education classification,  
21 occupation); and (3) health variables (private health insurance, health status, demand for the  
22 same health service, physician visit, hospitalization, dengue, malaria and type of service  
23 usually used). The variables from the first block were kept for the next stage if they  
24 presented a p-value  $\leq 0.05$ . Multicollinearity among the independent variables was  
25 discarded by assessing the variance inflation factors.<sup>22</sup>  
26  
27

28  
29 To analyse whether the diseases grouped in patterns, an exploratory factor analysis  
30 was conducted by the principal component method, stratified by sex.<sup>23 24</sup> This technique  
31 allowed us to identify the tendency of coexisting diseases and to select a set of variables  
32 with potentially common causal factors, such as interaction between diseases and/or their  
33 treatments and/or common risk factors, which were interpreted as multimorbidity patterns.  
34 The tetrachoric correlation coefficient was used in the analysis because it is better than  
35 Pearson's correlation coefficient for dichotomous outcomes.<sup>25</sup> The suitability of the  
36 sampling was evaluated by the Kaiser-Meyer-Olkin test (KMO), which was considered  
37 adequate if the index was  $\geq 0.70$ , and the Bartlett sphericity test, which was considered  
38 adequate if its p-value was  $\leq 0.05$ .<sup>23 26</sup> To establish the number of factors to be maintained,  
39 Cattell's graphic (Cattell's scree plot) was used, which represents the eigenvalues of the  
40 correlation matrix in descending order. The factor number extracted corresponds to the  
41 eigenvalue that produces the inflection point in the curve (eigenvalue > 1) and explains the  
42 minimum variance (>10% for each component). Variables were defined as being associated  
43  
44  
45  
46  
47  
48  
49  
50  
51  
52  
53  
54  
55  
56  
57  
58  
59  
60

1  
2  
3 with a factor if they presented loads  $\geq 0.30$ <sup>23</sup> (the closer to 1, the greater the association).  
4 Oblique rotation (promax) was performed to allow for better interpretation of the factor  
5 analysis.<sup>23</sup>  
6  
7

## 8 **RESULTS**

### 9 **Participant characteristics**

10 Table 1 shows the characteristics of the participants and the prevalence of  
11 multimorbidity. The sample was composed of 4001 adults and had a response rate of 76%.  
12 Women constituted over half of the sample. About one-half of the interviewees were  
13 between 25 and 44 years old, and 81% were black, brown or indigenous. The predominant  
14 social stratum was the lower middle class (57%), and about one-third of the participants  
15 were students or housewives. More than half reported good health (54%), and the majority  
16 had had a physician visit in the last year (76%). In the last 12 months, 7% reported dengue  
17 and 6% reported malaria. One-half of respondents reported seeking a tertiary health service  
18 when they needed care (47%).  
19  
20  
21  
22  
23  
24  
25  
26

### 27 **Prevalence of multimorbidity**

28 The prevalence of at least one chronic disease was 57% (95% CI 56.6-59.7%), with  
29 a mean of  $1.2 \pm 1.5$  diseases. The prevalence of  $\geq 2$  chronic conditions was 29% (95% CI  
30 27.6-30.5%) and  $\geq 3$  chronic diseases was 15% (95% CI 14.1-16.4%). Higher prevalence  
31 was observed in women, in widowers, in individuals with lower education, in retired  
32 individuals, in individuals who had the worst perceptions of health and in those who visited  
33 a doctor and were hospitalized in the last year (Table 1). The prevalence of any chronic  
34 disease and of multimorbidity increased with age (mean  $0.5 \pm 0.8$  in the 18-24-year-old  
35 group and  $2.5 \pm 1.9$  in those 60 years or above). In the previous year, dengue was reported  
36 by 44% of those who had two or more chronic conditions.  
37  
38  
39  
40  
41  
42  
43

44 Back pain was the most reported health problem in both women and men (Table 2).  
45 When coexisting diseases were stratified by sex, age, and multimorbidity, diabetes (94%)  
46 was the most prevalent disease in young women aged 18-34 years who reported  $\geq 2$   
47 morbidities, while in men, it was arthritis (89%). In the age group of 35-59 years, heart  
48  
49  
50  
51  
52  
53  
54  
55  
56  
57  
58  
59  
60



Table 1. Characteristics of participants and prevalence of multimorbidity (%), Manaus metropolitan region, Brazil, 2015 (n= 4001)\*

| Variable                  | % (n)        | Any chronic disease % (95% CI) | P value | Mean number of chronic health problems (95% CI) | Multimorbidity % (95% CI) |         |                     |         |
|---------------------------|--------------|--------------------------------|---------|-------------------------------------------------|---------------------------|---------|---------------------|---------|
|                           |              |                                |         |                                                 | ≥2                        | P value | ≥3                  | P value |
| Overall                   |              | 57.2 (55.6 to 58.7)            |         | 1.17 (1.1 to 1.2)                               | 29.0 (27.6 to 30.5)       |         | 15.2 (14.1 to 16.4) |         |
| Sex                       |              |                                | <0.001  |                                                 |                           | <0.001  |                     | <0.001  |
| Male                      | 47.2 (1,888) | 52.1 (49.8 to 54.0)            |         | 0.9 (0.8 to 0.9)                                | 21.5 (19.7 to 23.4)       |         | 9.3 (8.1 to 10.7)   |         |
| Female                    | 52.7 (2,113) | 61.8 (59.7 to 63.8)            |         | 1.39 (1.3 to 1.4)                               | 35.8 (33.8 to 37.8)       |         | 20.5 (18.8 to 22.3) |         |
| Age (years)               |              |                                | <0.001  |                                                 |                           | <0.001  |                     | <0.001  |
| 18 to 24                  | 20.8 (838)   | 37.0 (33.8 to 40.3)            |         | 0.5 (0.4 to 0.5)                                | 9.8 (7.9 to 12.0)         |         | 3.5 (2.5 to 5.0)    |         |
| 25 to 34                  | 28.7 (1,152) | 49.6 (46.7 to 52.5)            |         | 0.8 (0.7 to 0.8)                                | 18.6 (16.4 to 20.9)       |         | 6.9 (5.6 to 8.5)    |         |
| 35 to 44                  | 21.1 (843)   | 61.0 (57.6 to 64.2)            |         | 1.1 (1.0 to 1.2)                                | 30.0 (27.0 to 33.2)       |         | 12.7 (10.6 to 15.1) |         |
| 45 to 59                  | 19.3 (772)   | 71.4 (68.0 to 74.4)            |         | 1.7 (1.6 to 1.8)                                | 46.6 (43.1 to 50.2)       |         | 28.1 (25.1 to 31.4) |         |
| ≥60                       | 9.9 (396)    | 86.1 (82.3 to 89.2)            |         | 2.5 (2.3 to 2.7)                                | 63.5 (58.6 to 68.1)       |         | 44.4 (39.6 to 49.3) |         |
| Marital status            |              |                                | <0.001  |                                                 |                           | <0.001  |                     | <0.001  |
| Single                    | 54.2 (2,173) | 51.5 (49.3 to 53.5)            |         | 0.9 (0.8 to 0.9)                                | 20.8 (19.1 to 22.6)       |         | 10.3 (8.8 to 11.3)  |         |
| Married                   | 35.2 (1,409) | 62.0 (59.4 to 64.5)            |         | 1.3 (1.2 to 1.4)                                | 35.3 (32.9 to 37.9)       |         | 19.6 (17.6 to 21.8) |         |
| Separated/Divorced        | 6.5 (260)    | 65.6 (59.6 to 71.2)            |         | 1.5 (1.3 to 1.7)                                | 42.6 (36.8 to 48.7)       |         | 19.9 (15.5 to 25.2) |         |
| Widower                   | 4.0 (159)    | 79.3 (72.3 to 84.9)            |         | 2.2 (1.9 to 2.5)                                | 63.1 (55.3 to 70.2)       |         | 39.9 (32.5 to 47.7) |         |
| Skin colour               |              |                                | <0.001  |                                                 |                           | 0.0021  |                     | 0.0016  |
| White/yellow              | 19.3 (774)   | 51.7 (48.2 to 55.2)            |         | 1.1 (1.0 to 1.2)                                | 27.1 (24.1 to 30.4)       |         | 15.7 (13.3 to 18.5) |         |
| Black/brown/indigenous    | 80.5 (3,227) | 58.5 (56.8 to 60.2)            |         | 1.2 (1.1 to 1.2)                                | 29.5 (27.9 to 31.1)       |         | 15.1 (13.9 to 16.4) |         |
| Schooling level           |              |                                | <0.001  |                                                 |                           | <0.001  |                     | <0.001  |
| High education or above   | 3.9 (158)    | 57.1 (49.3 to 64.6)            |         | 1.2 (1.0 to 1.5)                                | 32.6 (25.7 to 40.4)       |         | 16.1 (11.7 to 23.7) |         |
| High school               | 47.5 (1,903) | 51.0 (48.8 to 53.3)            |         | 0.9 (0.8 to 1.0)                                | 22.5 (20.7 to 24.5)       |         | 9.0 (7.8 to 10.4)   |         |
| Middle school             | 16.2 (649)   | 50.0 (46.2 to 53.8)            |         | 0.9 (0.8 to 1.0)                                | 21.1 (18.2 to 24.4)       |         | 10.7 (8.8 to 13.3)  |         |
| Elementary school or less | 32.2 (1,291) | 69.9 (67.4 to 72.4)            | <0.001  | 1.7 (1.6 to 1.8)                                | 42.1 (39.5 to 44.8)       |         | 26.5 (24.1 to 28.9) |         |
| Economic classification†  |              |                                |         |                                                 |                           | <0.001  |                     | <0.001  |
| A - B                     | 15.7 (629)   | 51.2 (47.2 to 55.1)            |         | 0.9 (0.8 to 1.1)                                | 24.6 (21.4 to 28.2)       |         | 11.1 (8.8 to 13.8)  |         |
| C                         | 57.1 (2,285) | 55.5 (53.4 to 57.5)            |         | 1.0 (1.0 to 1.1)                                | 26.1 (24.3 to 27.9)       |         | 13.2 (11.9 to 14.7) |         |
| D - E                     | 27.2 (1,087) | 64.3 (61.4 to 67.2)            |         | 1.5 (1.4 to 1.6)                                | 37.7 (34.9 to 40.7)       |         | 21.8 (19.4 to 24.3) |         |
| Occupation                |              |                                | <0.001  |                                                 |                           | <0.001  |                     | <0.001  |

1  
2  
3  
4  
5  
6  
7  
8  
9  
10  
11  
12  
13  
14  
15  
16  
17  
18  
19  
20  
21  
22  
23  
24  
25  
26  
27  
28  
29  
30  
31  
32  
33  
34  
35  
36  
37  
38  
39  
40  
41  
42  
43  
44  
45  
46  
47

|                          |              |                     |        |                   |                     |        |                     |        |
|--------------------------|--------------|---------------------|--------|-------------------|---------------------|--------|---------------------|--------|
| Formal job               | 19.0 (761)   | 52.7 (49.1 to 56.2) |        | 0.9 (0.8 to 1.0)  | 22.7 (19.8 to 25.8) |        | 9.2 (7.3 to 11.5)   |        |
| Informal job             | 28.7 (1,149) | 55.9 (53.0 to 58.7) |        | 1.0 (1.0 to 1.1)  | 27.6 (25.1 to 30.3) |        | 12.9 (11.1 to 15.0) |        |
| Retired                  | 7.9 (315)    | 79.2 (74.3 to 83.3) |        | 2.4 (2.2 to 2.6)  | 60.5 (55.4 to 65.8) |        | 43.4 (38.0 to 49.0) |        |
| Student/ housewife       | 29.8 (1,199) | 55.0 (52.2 to 57.8) |        | 1.1 (1.1 to 1.2)  | 29.0 (25.5 to 31.6) |        | 15.8 (13.8 to 18.0) |        |
| Unemployed               | 14.4 (577)   | 58.3 (54.2 to 62.3) |        | 1.0 (0.9 to 1.1)  | 23.1 (19.8 to 26.7) |        | 11.2 (8.9 to 14.1)  |        |
| Private health insurance |              |                     | 0.348  |                   |                     | 0.697  |                     | 0.616  |
| Yes                      | 13.0 (523)   | 55.3 (51.0 to 59.5) |        | 1.0 (0.9 to 1.29) | 28.0 (24.6 to 32.3) |        | 14.5 (11.7 to 17.8) |        |
| No                       | 87.0 (3,478) | 57.5 (55.8 to 59.1) |        | 1.2 (1.1 to 1.2)  | 29.0 (27.6 to 30.7) |        | 15.3 (14.2 to 16.6) |        |
| Health status            |              |                     | <0.001 |                   |                     | <0.001 |                     | <0.001 |
| Very good                | 11.9 (471)   | 30.8 (26.8 to 35.2) |        | 0.4 (0.47 to 0.5) | 9.7 (7.3 to 12.7)   |        | 3.1 (1.9 to 5.1)    |        |
| Good                     | 54.3 (2,175) | 50.4 (48.3 to 52.5) |        | 0.8 (0.8 to 0.9)  | 20.3 (18.7 to 22.0) |        | 7.9 (6.8 to 9.1)    |        |
| Fair                     | 27.7 (1,108) | 75.1 (72.5 to 77.5) |        | 1.7 (1.6 to 1.8)  | 45.2 (42.3 to 48.1) |        | 26.0 (23.5 to 28.6) |        |
| Bad                      | 4.8 (193)    | 88.6 (83.2 to 93.3) |        | 2.6 (2.4 to 2.9)  | 68.4 (61.6 to 74.6) |        | 50.3 (43.3 to 57.3) |        |
| Very bad                 | 1.3 (54)     | 81.5 (68.9 to 89.7) |        | 3.6 (3.0 to 4.3)  | 77.7 (64.8 to 86.9) |        | 70.3 (57.0 to 81.0) |        |
| City                     |              |                     | <0.001 |                   |                     | <0.001 |                     | <0.001 |
| Capital                  | 86.8 (3,479) | 58.4 (56.8 to 60.0) |        | 1.2 (1.1 to 1.2)  | 30.2 (28.7 to 31.7) |        | 15.8 (14.6 to 17.1) |        |
| Countryside              | 13.1 (522)   | 49.2 (44.9 to 53.5) |        | 0.9 (0.8 to 1.0)  | 21.5 (18.2 to 25.3) |        | 11.3 (0.8 to 14.3)  |        |
| Health reference         |              |                     | <0.001 |                   |                     | <0.001 |                     | <0.001 |
| Yes                      | 60.7 (2,434) | 62.3 (60.3 to 64.2) |        | 1.3 (1.2 to 1.4)  | 34.4 (31.5 to 36.3) |        | 18.7 (17.1 to 20.3) |        |
| No                       | 39.2 (1,567) | 49.4 (46.9 to 51.9) |        | 0.9 (0.8 to 0.9)  | 20.8 (18.9 to 22.9) |        | 9.8 (17.2 to 20.3)  |        |
| Physician visit          |              |                     | <0.001 |                   |                     | <0.001 |                     | <0.001 |
| Yes                      | 76.5(3,066)  | 60.8 (59.0 to 62.5) |        | 1.2 (1.2 to 1.3)  | 32,1 (30.5 to 33.8) |        | 17.4 (16.1 to 18.8) |        |
| No                       | 23.4(935)    | 45.5 (42.3 to 48.7) |        | 0.8 (0.7 to 0.9)  | 18,9 (16.5 to 21.5) |        | 8.2 (6.6 to 10.2)   |        |
| Hospitalization          |              |                     | <0.001 |                   |                     | <0.001 |                     | <0.001 |
| Yes                      | 7.0 (273)    | 72.9 (67.3 to 77.8) |        | 1.2(1.2 to 1.3)   | 47 (41.4 to 53.2)   |        | 28.1 (23.1 to 33.8) |        |
| No                       | 93.0 (3,728) | 56.1 (67.3 to 77.8) |        | 0.8(0.7 to 0.9)   | 27 (26.3 to 29.2)   |        | 14.3 (13.2 to 15.4) |        |
| Dengue                   |              |                     | 0.002  |                   |                     | <0.001 |                     | <0.001 |
| Yes                      | 7.0(281)     | 65.9 (60.1 to 71.2) |        | 1.6 (1.4 to 1.8)  | 44.2 (38.5 to 50.1) |        | 27.6 (22.7 to 33.1) |        |
| No                       | 93(3,720)    | 56.5 (54.9 to 58.1) |        | 1.1 (1.0 to 1.1)  | 27.9 (26.5 to 29.3) |        | 14.3 (13.2 to 15.5) |        |
| Malaria                  |              |                     | 0.420  |                   |                     | 0.122  |                     | 0.014  |
| Yes                      | 5.9(234)     | 54.6 (48.2 to 60.9) |        | 1.3 (1.1 to 1.5)  | 33.5 (27.7 to 39.8) |        | 20.8 (16.1 to 26.5) |        |
| No                       | 94(3,767)    | 57.3 (0.55 to 0.58) |        | 1.1 (1.1 to 1.2)  | 28.8 (27.3 to 30.2) |        | 14.9 (13.8 to 16.0) |        |
| Medical attention        |              |                     | <0.001 |                   |                     | 0.0484 |                     | 0.531  |
| Primary                  | 30.2(1,208)  | 60.8 (58.0 to 63.5) |        | 1.2 (1.1 to 1.3)  | 29.9 (27.3 to 32.5) |        | 15.2 (13.3 to 17.3) |        |
| Secondary                | 14.9(598)    | 62.3 (58.3 to 66.1) |        | 1.3 (1.2 to 1.5)  | 33.0 (29.4 to 36.9) |        | 18.9 (15.9 to 22.2) |        |
| Tertiary                 | 47.2(1,886)  | 54.0 (51.8 to 56.3) |        | 1.1 (1.0 to 1.2)  | 27.7 (25.7 to 29.8) |        | 14.3 (12.8 to 15.9) |        |
| Others                   | 7.7(309)     | 52.7 (47.2 to 58.3) |        | 1.0 (0.9 to 1.2)  | 26.2 (21.6 to 31.4) |        | 14.2 (10.7 to 18.5) |        |

\* Descriptive statistics using simple frequency and Pearson  $\chi^2$  test

CI: confidence interval; physician visit, hospitalization, dengue and malaria in last 12 months; † Average household income in 2015: A-B, US\$6500-US\$1419; C, US\$463-US\$772; D-E, US\$205.

Table 2. Prevalence (%) of most common diseases stratified by sex, age and multimorbidity group, Manaus metropolitan region, Brazil, 2015\*

| Morbidities                         | % (n)      | Multimorbidity $\geq 2$ |                |                    | Multimorbidity $\geq 3$ |                |                    |
|-------------------------------------|------------|-------------------------|----------------|--------------------|-------------------------|----------------|--------------------|
|                                     |            | 18-34<br>% (n)          | 35-59<br>% (n) | $\geq 60$<br>% (n) | 18-34<br>% (n)          | 35-59<br>% (n) | $\geq 60$<br>% (n) |
| <b>Women (2,113)</b>                |            |                         |                |                    |                         |                |                    |
| Spinal column problem <sup>†</sup>  | 35.3 (747) | 42.6 (135)              | 75.6 (248)     | 96.1 (99)          | 20.1 (64)               | 53.6 (176)     | 75.7 (78)          |
| Hypertension                        | 24.4 (516) | 62.3 (78)               | 83.0 (211)     | 92.0 (126)         | 32.7 (94)               | 58.7 (149)     | 71.6 (98)          |
| Arthritis or rheumatism             | 19.5 (414) | 79.5 (66)               | 91.6 (197)     | 94.8 (110)         | 39.7 (33)               | 67.7 (146)     | 79.3 (92)          |
| Hypercholesterolemia                | 20.1 (425) | 79.5 (66)               | 90.8 (217)     | 97.0 (100)         | 55.4 (46)               | 62.4 (149)     | 82.5 (85)          |
| Diabetes                            | 7.4 (157)  | 93.7 (15)               | 90.2 (82)      | 96.0 (48)          | 87.4 (14)               | 76.6 (70)      | 84.5 (42)          |
| Asthma or asthmatic bronchitis      | 7.3 (155)  | 68.5 (50)               | 85.6 (54)      | 100.0 (19)         | 38.3 (28)               | 73.0 (46)      | 100.0 (19)         |
| Depressive disorder                 | 7.4 (158)  | 71.0 (44)               | 91.9 (69)      | 100.0 (21)         | 30.6 (19)               | 73.2 (55)      | 95.2 (20)          |
| Heart disease <sup>‡</sup>          | 5.6 (119)  | 71.8 (23)               | 98.1 (52)      | 100.0 (34)         | 53.0 (17)               | 86.7 (46)      | 94.0 (32)          |
| <b>Men (1888)</b>                   |            |                         |                |                    |                         |                |                    |
| Chronic spinal problem <sup>†</sup> | 35.0 (662) | 27.5 (77)               | 49.7 (149)     | 65.8 (54)          | 7.1 (20)                | 21.0 (63)      | 51.4 (42)          |
| Hypertension                        | 14.4 (271) | 77.1 (37)               | 76.7 (112)     | 79.5 (61)          | 35.3 (17)               | 41.1 (60)      | 58.6 (45)          |
| Arthritis or rheumatism             | 9.5 (179)  | 89.3 (25)               | 86.8 (80)      | 84.9 (50)          | 46.1 (13)               | 48.9 (45)      | 64.5 (38)          |
| Hypercholesterolemia                | 9.0 (171)  | 57.1 (24)               | 87.6 (85)      | 87.6 (28)          | 33.3 (14)               | 49.4 (48)      | 78.2 (25)          |

P values of all variables were  $\leq 0.002$

\* multimorbidity with prevalence  $\geq 5\%$ .

<sup>†</sup> chronic back pain or neck, low back pain, sciatica, vertebral or disc pain

<sup>‡</sup> heart disease, or heart attack, angina, cardiac insufficiency

diseases (98%), depressive disorders and arthritis (92%) were higher in women with  $\geq 2$  morbidities, while in men, hypercholesterolemia was the most common (88%).

Table 3 shows the investigation for factors associated with multimorbidity. After adjustment, multimorbidity ( $\geq 2$  diseases) was associated with female sex (PR = 1.7, 95% CI 1.5 to 1.8), age between 45 and 59 years (PR = 4.4, 95% CI 3.4 to 5.4) and age  $\geq 60$  years (PR = 5.7, 95% CI 4.5 to 7.1). The presence of  $\geq 3$  diseases was associated with female sex (PR = 2.2, 95% CI 1.8 to 2.5), age 45-59 years (PR = 7.6, 95% CI 5.2 to 11.1), age  $\geq 60$  years (PR = 12.0, 95% CI 8.0 to 17.6), dengue in the last 12 months (PR = 1.3, 95% CI 1.0 to 1.6), and very poor health status (PR = 7.7, 95% CI 4.6 to 12.9). Having  $\geq 3$  chronic conditions increased the demand for physician visits, hospitalization in the last

year, and demand for the same health service. Education, income, occupation, and malaria in the last 12 months did not show associations with multimorbidity.

The factor analysis is presented in Table 4. The KMO coefficient was 0.85 for women and 0.78 for men, and the Bartlett sphericity test presented a p-value  $\leq 0.001$  for both, suggesting an adequate factor analysis. In women, one multimorbidity pattern (supplemental figure 1) explained 81% of the total variance, including the 12 chronic diseases analysed. In men, two factors were identified (supplemental figure 2). In the first factor, heart diseases, chronic kidney disease, stroke, arthritis or rheumatism, chronic spinal problems, depressive disorders, asthma or bronchitis and lung diseases were the associated chronic diseases, which explained a total of 62% of the variance. In the second, the associated chronic diseases were hypercholesterolemia, hypertension, heart disease, diabetes and arthritis, which explained 56% of the variance.

## DISCUSSION

More than half of the adults had some chronic disease. The occurrence of two or more morbidities was reported by more than a quarter of the adults. Four out of twenty-five individuals reported a multimorbidity of three or more. According to the results, it is estimated that over 1 300 000 residents of the metropolitan region of Manaus have a chronic condition, and almost 700 000 have multimorbidity. Female sex, elderly age,

Table 3. Adjusted prevalence ratio (PRs) and 95% CIs for any chronic disease and multimorbidity  $\geq 2$  and  $\geq 3$ , according to sociodemographic and health variables based on hierarchical Poisson regression. Manaus metropolitan region, Brazil, 2015 (n=4001)

| Variable                  | Any chronic disease<br>PR (95% CI) | P value | Multimorbidity PR (95% CI) |         |                       |         |
|---------------------------|------------------------------------|---------|----------------------------|---------|-----------------------|---------|
|                           |                                    |         | $\geq 2$                   | P value | $\geq 3$              | P value |
| <b>Demographic block†</b> |                                    |         |                            |         |                       |         |
| Sex                       |                                    |         |                            |         |                       |         |
| Male                      | 1.0                                |         | 1.0                        |         | 1.0                   |         |
| Female                    | 1.19 (1.12 to 1.25)                | <0.001  | 1.66 (1.50 to 1.83)        | <0.001  | 2.19 (1.88 to 2.56)   | <0.001  |
| Age group                 |                                    |         |                            |         |                       |         |
| 18 to 24                  | 1.00                               |         |                            |         | 1.0                   |         |
| 25 to 34                  | 1.33 (1.19 to 1.48)                | <0.001  | 1.81 (1.42 to 2.30)        | <0.001  | 1.88 (1.24 to 2.84)   | 0.003   |
| 35 to 44                  | 1.63 (1.47 to 1.81)                | <0.001  | 2.85 (2.26 to 3.60)        | <0.001  | 3.40 (2.28 to 5.06)   | <0.001  |
| 45 to 59                  | 1.91 (1.72 to 2.12)                | <0.001  | 4.36 (3.48 to 5.46)        | <0.001  | 7.62 (5.22 to 11.10)  | <0.001  |
| $\geq 60$                 | 2.32 (2.08 to 2.57)                | <0.001  | 5.68 (4.51 to 7.15)        | <0.001  | 12.03 (8.20 to 17.66) | <0.001  |
| Marital status            |                                    |         |                            |         |                       |         |
| Single                    | 1.0                                |         | 1.0                        |         | 1.0                   |         |
| Married                   | 1.09 (0.96 to 1.07)                | 0.521   | 1.20 (1.07 to 1.33)        | 0.001   | 1.21 (1.03 to 1.42)   | 0.017   |

|    |                              |                     |        |                     |        |                      |        |  |
|----|------------------------------|---------------------|--------|---------------------|--------|----------------------|--------|--|
| 1  |                              |                     |        |                     |        |                      |        |  |
| 2  |                              |                     |        |                     |        |                      |        |  |
| 3  | Separated/                   |                     |        |                     |        |                      |        |  |
| 4  | Divorced                     | 1.00 (0.91 to 1.10) | 0.961  | 1.24 (1.06 to 1.45) | 0.006  | 0.93 (0.72 to 1.21)  | 0.620  |  |
| 5  | Widower                      | 0.96 (0.87 to 1.06) | 0.475  | 1.18 (1.01 to 1.38) | 0.032  | 0.99 (0.77 to 1.26)  | 0.962  |  |
| 6  | Skin colour                  |                     |        |                     |        |                      |        |  |
| 7  | White/yellow                 | 1.0                 |        | 1.0                 |        | 1.0                  |        |  |
| 8  | Black/brown/                 | 1.10 (1.02 to 1.18) | 0.006  | 1.04 (0.93-1.16)    | 0.474  | 0.89 (0.75 to 1.05)  | 0.175  |  |
| 9  | Indigenous                   |                     |        |                     |        |                      |        |  |
| 10 |                              |                     |        |                     |        |                      |        |  |
| 11 | <b>Socioeconomic block †</b> |                     |        |                     |        |                      |        |  |
| 12 | Education                    |                     |        |                     |        |                      |        |  |
| 13 | High                         | 1.0                 |        | 1.0                 |        | 1.0                  |        |  |
| 14 | education                    |                     |        |                     |        |                      |        |  |
| 15 | or above                     |                     |        |                     |        |                      |        |  |
| 16 | High school                  | 1.00 (0.87 to 1.14) | 0.976  | 0.89 (0.71 to 1.12) | 0.357  | 0.73 (0.50 to 1.05)  | 0.091  |  |
| 17 | Middle school                | 0.98 (0.84 to 1.13) | 0.754  | 0.81 (0.63 to 1.06) | 0.135  | 0.80 (0.53 to 1.20)  | 0.289  |  |
| 18 | Elementary                   |                     |        |                     | 0.877  |                      |        |  |
| 19 | school or less               | 1.12 (0.98 to 1.29) | 0.106  | 1.01 (0.80 to 1.28) |        | 1.08 (0.75 to 1.55)  | 0.667  |  |
| 20 |                              |                     |        |                     |        |                      |        |  |
| 21 | Economic                     |                     |        |                     |        |                      |        |  |
| 22 | classification               |                     |        |                     |        |                      |        |  |
| 23 | A – B                        | 1.0                 |        | 1.0                 |        | 1.0                  |        |  |
| 24 | C                            | 1.04 (0.96 to 1.13) | 0.361  | 1.01 (0.87 to 1.17) | 0.881  | 1.05 (0.83 to 1.33)  | 0.656  |  |
| 25 | D – E                        | 1.06 (0.97 to 1.16) | 0.207  | 1.15 (0.98 to 1.36) | 0.075  | 1.15 (0.89 to 1.49)  | 0.254  |  |
| 26 | Occupation                   |                     |        |                     |        |                      |        |  |
| 27 | Formal job                   | 1.0                 |        | 1.0                 |        | 1.0                  |        |  |
| 28 | Informal job                 | 0.95 (0.87 to 1.03) | 0.223  | 0.97 (0.83 to 1.13) | 0.728  | 0.98 (0.76 to 1.28)  | 0.929  |  |
| 29 | Retired                      | 0.95 (0.86 to 1.06) | 0.363  | 1.11 (0.92 to 1.32) | 0.258  | 1.39 (1.02 to 1.88)  | 0.033  |  |
| 30 | Student/                     |                     |        |                     |        |                      |        |  |
| 31 | housewife                    | 0.96 (0.87 to 1.05) | 0.331  | 0.97 (0.83 to 1.14) | 0.767  | 1.05 (0.81 to 1.36)  | 0.671  |  |
| 32 | Unemployed                   | 1.09 (0.99 to 1.20) | 0.081  | 0.99 (0.81 to 1.20) | 0.949  | 1.13 (0.83 to 1.54)  | 0.404  |  |
| 33 |                              |                     |        |                     |        |                      |        |  |
| 34 | <b>Health block §</b>        |                     |        |                     |        |                      |        |  |
| 35 | Private health               |                     |        |                     |        |                      |        |  |
| 36 | insurance                    |                     |        |                     |        |                      |        |  |
| 37 | No                           | 1.0                 |        | 1.0                 |        | 1.0                  |        |  |
| 38 | Yes                          | 0.99 (0.91 to 1.07) | 0.913  | 1.03 (0.90 to 1.18) | 0.593  | 1.04 (0.84 to 1.28)  | 0.771  |  |
| 39 | Health status                |                     |        |                     |        |                      |        |  |
| 40 | Very good                    | 1.0                 |        | 1.0                 |        | 1.0                  |        |  |
| 41 | Good                         | 1.43 (1.24 to 1.64) | <0.001 | 1.63 (1.23 to 2.15) | <0.001 | 1.81 (1.09 to 2.99)  | 0.020  |  |
| 42 | Fair                         | 1.94 (1.69 to 2.23) | <0.001 | 2.84 (2.15 to 3.76) | <0.001 | 4.21 (2.56 to 6.93)  | <0.001 |  |
| 43 | Bad                          | 2.01 (1.80 to 2.41) | <0.001 | 3.53 (2.64 to 4.71) | <0.001 | 6.25 (3.74 to 10.47) | <0.001 |  |
| 44 | Very bad                     | 1.91 (1.60 to 2.27) | <0.001 | 3.70 (2.73 to 5.00) | <0.001 | 7.89 (4.71 to 13.23) | <0.001 |  |
| 45 |                              |                     |        |                     |        |                      |        |  |
| 46 | Health reference             |                     |        |                     |        |                      |        |  |
| 47 | No                           | 1.0                 |        | 1.0                 |        | 1.0                  |        |  |
| 48 | Yes                          | 1.12 (1.06 to 1.19) | <0.001 | 1.33 (1.19 to 1.47) | <0.001 | 1.40 (1.20 to 1.63)  | <0.001 |  |
| 49 | Physician visit              |                     |        |                     |        |                      |        |  |
| 50 | No                           | 1.0                 |        | 1.0                 |        | 1.0                  |        |  |
| 51 | Yes                          | 1.13 (1.05 to 1.22) | <0.001 | 1.22 (1.07 to 1.40) | 0.002  | 1.33 (1.09 to 1.64)  | 0.005  |  |
| 52 | Hospitalization              |                     |        |                     |        |                      |        |  |
| 53 | No                           | 1.0                 |        | 1.0                 |        | 1.0                  |        |  |
| 54 | Yes                          | 1.18 (1.09 to 1.27) | <0.001 | 1.36 (1.20 to 1.54) | <0.001 | 1.43 (1.17 to 1.74)  | <0.001 |  |
| 55 | Dengue                       |                     |        |                     |        |                      |        |  |
| 56 |                              |                     |        |                     |        |                      |        |  |
| 57 |                              |                     |        |                     |        |                      |        |  |
| 58 |                              |                     |        |                     |        |                      |        |  |
| 59 |                              |                     |        |                     |        |                      |        |  |
| 60 |                              |                     |        |                     |        |                      |        |  |

|    |                 |                     |       |                     |       |                     |       |
|----|-----------------|---------------------|-------|---------------------|-------|---------------------|-------|
| 3  | No              | 1.0                 |       | 1.0                 |       | 1.0                 |       |
| 4  | Yes             | 1.07 (0.99 to 1.16) | 0.079 | 1.23 (1.08 to 1.41) | 0.001 | 1.36 (1.13 to 1.64) | 0.001 |
| 5  | Malaria         |                     |       |                     |       |                     |       |
| 6  | No              | 1.0                 |       | 1.0                 |       | 1.0                 |       |
| 7  | Yes             | 0.98 (0.82 to 1.01) | 0.109 | 0.96 (0.81 to 1.13) | 0.653 | 0.99 (0.78 to 1.26) | 0.947 |
| 9  | Type of service |                     |       |                     |       |                     |       |
| 10 | Primary         | 1.0                 |       | 1.0                 |       | 1.0                 |       |
| 11 | Secondary       | 1.02 (0.95 to 1.09) | 0.518 | 1.07 (0.95 to 1.22) | 0.265 | 1.15 (0.95 to 1.40) | 0.129 |
| 12 | Tertiary        | 0.95 (0.89 to 1.00) | 0.086 | 1.01 (0.92 to 1.12) | 0.780 | 1.05 (0.90 to 1.25) | 0.489 |
| 13 | Outros          | 0.92 (0.82 to 1.03) | 0.180 | 0.97 (0.80 to 1.17) | 0.723 | 1.13 (0.85 to 1.51) | 0.374 |

Significant variables kept in each block of analysis:

**Any chronic disease:** †sex, age, marital status and race; ‡sex, age, marital status, education, income, occupation; §sex, age, marital status, income, occupation, private health insurance, health status, health reference, medical consultation in last 12 months, hospital admission in last 12 months, dengue, malaria and type of health service that usually comes

**≥2 morbidities:** †sex, age, marital status and race; ‡sex, age, marital status, education, income, occupation; §sex, age, marital status, income, occupation, private health insurance, health status, health reference, medical consultation in last 12 months, hospital admission in last 12 months, dengue, malaria and type of health service that usually comes

**≥3 morbidities:** †sex, age, marital status and race; ‡sex, age, marital status, education, income, occupation; §sex, age, marital status, income, occupation, private health insurance, health status, health reference, medical consultation in last 12 months, hospital admission in last 12 months, dengue, malaria and type of health service that usually comes

dengue in the last year, poor health status, reference health service use, physician visits and hospitalization presented associations with multimorbidity. Chronic spinal problems were the most commonly reported diseases. Diabetes was the most common disease in women aged 18-34 years with multimorbidity  $\geq 2$ , and hypercholesterolemia was the corresponding disease in men aged 35-59 years.

The main limitation of this research is the way in which the outcome was measured, the participants' self-report, and consequently, our data were error-prone and influenced by memory bias. This bias is more common in elderly individuals of lower socioeconomic and educational levels, who are susceptible to underreporting.<sup>7,27</sup> Survival bias also influenced the results, since patients who died prematurely from those causes, were hospitalized or had more serious diseases were not available in the household to participate in the survey. In addition, we did not investigate disease severity. Previous studies recommend inquiring about the degree of disease intensity, the diseases' interference with routine activities and disabilities,<sup>5,28</sup> which were not measured in this study.

This is the first local study to estimate the prevalence of multimorbidity in adults in the state of Amazonas. We used a list of 12 diseases and cut-off point of two or more and three or more multimorbidity, in accordance with previous studies.<sup>3,5</sup>

Table 4. Factor score of each chronic disease in women and men, Manaus metropolitan region, Brazil, 2015

| Morbidity                      | Women     | Men      |          |
|--------------------------------|-----------|----------|----------|
|                                | (N=2,113) | Factor 1 | Factor 2 |
| Hypercholesterolemia           | 0.70      |          | 0.62     |
| Hypertension                   | 0.64      |          | 0.78     |
| Heart disease                  | 0.72      | 0.40     | 0.47     |
| Diabetes                       | 0.63      |          | 0.85     |
| Chronic kidney disease         | 0.46      | 0.73     |          |
| Stroke                         | 0.66      | 0.61     |          |
| Arthritis                      | 0.65      | 0.40     | 0.35     |
| Chronic spinal problem         | 0.46      | 0.44     |          |
| Depressive disorder            | 0.49      | 0.58     |          |
| Asthma or asthmatic bronchitis | 0.44      | 0.48     |          |
| Lung diseases†                 | 0.53      | 0.76     |          |
| Cancer                         | 0.52      | -        |          |
| Proportion of variance (%)     | 81.0      | 62.0     | 56.0     |
| Kaiser-Meyer-Olkin             | 0.82      | 0.78     |          |

Note: Kept factors were those with scores  $\geq 0.30$  after oblique rotation; cancer showed negative values in men and was excluded

† pulmonary emphysema, bronchitis, chronic obstructive lung disease

We obtained a 76% response rate, which may constitute a source of selection bias. Efforts were employed to improve representativeness by using predefined sex and age quotas and interviewing one individual per family, according to official estimates.<sup>29</sup>

A systematic review that summarized 39 observational studies conducted between 1993 and 2013 identified a range of five to 335 diseases for the study of multimorbidity.<sup>3</sup> As expected, the lower the number of diseases included in the research, the lower the prevalence observed.<sup>30</sup> Regardless of the number of chronic conditions reported and how they were defined, multimorbidity estimates are influenced by self-report. Although widely applied,<sup>3 5 28</sup> self-reports are more likely to suffer classification bias or have no validated instrument for confirmation.

We identified the most vulnerable multimorbidity groups were women and the elderly. A National Health Survey conducted in Brazil reported that women are most affected in all socioeconomic groups, especially the elderly.<sup>31</sup>

1  
2  
3 Back pain was the most frequent disease, reported by one-third of the sample. In our  
4 study, this morbidity was assessed using different terms, which may have increased the  
5 sensitivity of the assessment. An even higher proportion (49.4%) of vertebral spine/back  
6 issues was observed in a representative cross-sectional survey of Brazilian adults.<sup>31</sup> In other  
7 contexts, similar prevalence values were estimated.<sup>32</sup>

8  
9  
10  
11 Two findings of our research are rarely described in previous studies: the higher  
12 frequency of multimorbidity in younger adults and the lack of association with economic  
13 status. One-half of adults aged 25-34 years and almost two-thirds of interviewees aged 35-  
14 44 years reported any chronic condition, and almost one-third had multimorbidity. It is  
15 important to emphasize that half of the Manaus metropolitan region is concentrated in this  
16 age range (25-44 years old). A systematic review of 24 cross-sectional studies on  
17 multimorbidity found income as a conflicting factor across studies, associated either with  
18 richer or poorer individuals, while lower educational attainment was associated with a 64%  
19 higher chance of multimorbidity.<sup>33</sup> A Mendelian analysis of 543 733 individuals from high-  
20 income countries has found that 3.6 more years of education reduces the risk of coronary  
21 heart disease by one-third.<sup>34</sup>

22  
23  
24  
25  
26  
27  
28  
29  
30  
31 In lower-income countries, such as Brazil, which also faces economic austerity  
32 policies, rising unemployment and unstable social and health policies,<sup>35</sup> it is possible to  
33 predict a reduction in access to health services, with a consequent increase in morbidity.  
34 This effect was observed in other austerity scenarios, in which this type of policy reduced  
35 jobs, education and use of health services, resulting in an increase of chronic diseases.<sup>36 37</sup>

36  
37  
38  
39  
40  
41 A single multimorbidity pattern was identified in women, which included  
42 cardiometabolic, skeletal, respiratory, psychosomatic, and cancer diseases. Since only one  
43 pattern was identified out of all reported diseases, it is possible that the risk factors are  
44 similar and are triggering a sequence of diseases, or one disease may be leading to another.  
45 In men, factor 1 included musculoskeletal, respiratory and psychosomatic diseases, and  
46 factor 2 included cardiometabolic diseases. Elderly men were assumed to be in factor 1,  
47 since they had worse outcomes. Factor 2 included younger men with diseases developed  
48 from risk factors such as sedentary lifestyle and obesity.

49  
50  
51  
52  
53 Our results showed similarities to a cross-sectional study conducted in 2012 in the  
54 southern region of Brazil with 2927 subjects, in which 29.1% of the interviewees had more  
55  
56  
57  
58  
59  
60



1  
2  
3 than two chronic diseases and 14% had three or more.<sup>38</sup> The 2013 National Health Survey  
4 also confirmed these findings: 22% reported two or more chronic diseases, and 10% were  
5 affected by more than three.<sup>14</sup> The highest prevalence was observed in the south (26-29%)  
6 and southeast (23-25%), which are more economically developed and have greater access  
7 to health services.<sup>15</sup> Similarly, any chronic disease occurred in 45% of Brazilians, with a  
8 lower prevalence in the north region.<sup>39</sup>  
9

10  
11  
12  
13 Greater or lesser use of health services influences the multimorbidity self-report.<sup>40 41</sup>  
14  
15 A systematic review including 27 cross-sectional population-based studies conducted  
16 between 1992 and 2013 in Brazil estimated lower prevalence of medical consultation in the  
17 north region and greater in the south region.<sup>15</sup>  
18  
19

20  
21 In contexts of higher economic development, a lower prevalence of multimorbidity  
22 was found. A survey conducted in 2012 in Italy, with 3 759 836 adults, detected that 15%  
23 of individuals presented two or more chronic diseases.<sup>10</sup> In Ireland, a representative sample  
24 of the population (11.3% of subjects  $\geq 50$  years) presented multiple diseases.<sup>12</sup> Furthermore,  
25 an electronic medical data analysis, conducted in 2007 with 1 751 841 users of the Scottish  
26 Health Service, found that 23% had multimorbidity.<sup>9</sup> In a comparable economic context to  
27 Brazil's, a population-based Indian study conducted in 2007 with 10 973 interviewees  
28 identified smaller proportions (28% had any chronic disease and approximately 9% had  
29 multimorbidity).<sup>42</sup>  
30  
31  
32  
33  
34  
35

36  
37 Diabetes was a common chronic condition coexisting with two or more morbidities  
38 in young women, while heart diseases were the most common in those aged 35-59 years. In  
39 men, arthritis and hypercholesterolemia were more frequent. In a study conducted in  
40 Portugal, diabetes, osteoarthritis and lipid disorders were more common in women with  
41 more than two morbidities, while hypertension, osteoarthritis and obesity were more  
42 common in men.<sup>43</sup>  
43  
44  
45

46  
47 The presence of dengue was higher in individuals with multimorbidity, possibly due  
48 to the lower immunologic response observed in chronic diseases such as diabetes,  
49 rheumatoid arthritis, and asthma.<sup>44 45</sup> A systematic review including 16 cohort and case-  
50 control studies conducted between 2007 and 2013 showed that chronic diseases were risk  
51 factors for severe forms of dengue.<sup>46</sup> In another meta-analysis of 10 studies conducted  
52 between 2006 and 2014,<sup>47</sup> diabetes was significantly associated with haemorrhagic dengue:  
53  
54  
55  
56  
57  
58  
59  
60

1  
2  
3 regardless of demographic and socioeconomic characteristics, the association was 5%  
4 higher compared to individuals who did not have diabetes.

## 6 **CONCLUSION**

8           Multimorbidity was common in residents of the metropolitan region of Manaus and  
9 was associated with female sex, elderly people and poorer health perception. Prevention  
10 and control strategies should prioritize these groups. Future analyses may investigate the  
11 relationship between multimorbidity and physical and psychic disorders, as well as the  
12 impact on the use and costs of health services in the region.

13  
14  
15  
16  
17 **Contributors** MTS, TFG, and MEAA designed the study. MEAA, MTS and BNP  
18 performed the statistical analyses. MEAA, MTS, TFG, BNP and MGP interpreted the  
19 results and drafted the manuscript. All authors made critical revisions and provided  
20 intellectual content to the manuscript, approved the final version and agree to be  
21 accountable for all aspects of this work.

22  
23  
24  
25  
26 **Funding** This work was funded by the National Council for Scientific and Technological  
27 Development (Conselho Nacional para o Desenvolvimento Cientifico e Tecnologico -  
28 CNPq), [404990/2013-4 and 448093/2014-6, to MTS] and the Foundation for Research  
29 Support of the State of Amazonas (Fundação de Amparo à Pesquisa do Estado do  
30 Amazonas - FAPEAM), [062.00253.2014, to MEAA].

31  
32  
33  
34 **Competing interest** None declared

35  
36 **Patient consent** Obtained

37  
38 **Ethics approval** The research project was approved by the Research Ethics Committee of  
39 the Federal University of Amazonas. All the individuals who agreed to participate signed a  
40 free and informed consent form.

## 44 **REFERENCES**

- 45  
46  
47 1. van den Akker M, Buntinx F, Knottnerus JA. Comorbidity or multimorbidity: what's in a  
48 name? A review of literature. *The European Journal of General Practice*  
49 1996;2(2):65-70.
- 50 2. Le Reste JY, Nabbe P, Manceau B, et al. The European General Practice Research  
51 Network presents a comprehensive definition of multimorbidity in family medicine  
52 and long term care, following a systematic review of relevant literature. *Journal of*  
53 *the American Medical Directors Association* 2013;14(5):319-25.
- 54  
55  
56  
57  
58  
59  
60

3. Violan C, Foguet-Boreu Q, Flores-Mateo G, et al. Prevalence, determinants and patterns of multimorbidity in primary care: a systematic review of observational studies. *PloS One* 2014;9(7):e102149.
4. Diederichs C, Berger K, Bartels DB. The measurement of multiple chronic diseases—a systematic review on existing multimorbidity indices. *The Journals of Gerontology Series A: Biological Sciences and Medical Sciences* 2011;66(3):301-11.
5. Fortin M, Stewart M, Poitras M-E, et al. A systematic review of prevalence studies on multimorbidity: toward a more uniform methodology. *The Annals of Family Medicine* 2012;10(2):142-51.
6. Feigin V. Global, regional, and national life expectancy, all-cause mortality, and cause-specific mortality for 249 causes of death, 1980-2015: a systematic analysis for the Global Burden of Disease Study 2015. *The Lancet* 2016;388(10053):1459-544.
7. Hussain MA, Huxley RR, Al Mamun A. Multimorbidity prevalence and pattern in Indonesian adults: an exploratory study using national survey data. *BMJ Open* 2015;5(12):e009810.
8. Ryan A, Wallace E, O'Hara P, et al. Multimorbidity and functional decline in community-dwelling adults: a systematic review. *Health and Quality of Life Outcomes* 2015;13(1):168.
9. Barnett K, Mercer SW, Norbury M, et al. Epidemiology of multimorbidity and implications for health care, research, and medical education: a cross-sectional study. *The Lancet* 2012;380(9836):37-43.
10. Lenzi J, Avaldi VM, Rucci P, et al. Burden of multimorbidity in relation to age, gender and immigrant status: a cross-sectional study based on administrative data. *BMJ Open* 2016;6(12):e012812.
11. Lima-Costa MF, De Oliveira C, Macinko J, et al. Socioeconomic inequalities in health in older adults in Brazil and England. *American Journal of Public Health* 2012;102(8):1535-41.
12. Glynn LG, Valderas JM, Healy P, et al. The prevalence of multimorbidity in primary care and its effect on health care utilization and cost. *Family Practice* 2011;28(5):516-23.
13. Nagl A, Witte J, Hodek JM, et al. Relationship between multimorbidity and direct healthcare costs in an advanced elderly population. Results of the PRISCUS trial. *Zeitschrift für Gerontologie und Geriatrie* 2012;45(2):146-54. doi: 10.1007/s00391-011-0266-2 [published Online First: 2012/02/22]
14. Nunes BP, Chiavegatto Filho AD, Pati S, et al. Contextual and individual inequalities of multimorbidity in Brazilian adults: a cross-sectional national-based study. *BMJ Open* 2017;7(6):e015885.
15. Araújo MEA, Silva MT, Andrade KRC, et al. Prevalence of health services utilization in Brazil: a systematic review and meta-analysis. *Epidemiol Serv Saude* 2017;26(3):587-602. doi: 10.5123/S1679-49742017000300016
16. Silva MT, Galvao TF. Use of health services among adults living in Manaus Metropolitan Region, Brazil: population-based survey, 2015. *Epidemiol Serv Saude* 2017;26(4):725-34.
17. Kneipp SM, Yarandi HN. Complex sampling designs and statistical issues in secondary analysis. *Western Journal of Nursing Research* 2002;24(5):552-66.

18. ABEP. Associação Brasileira de Empresas de Pesquisa. Critério de Classificação Econômica Brasil; 2015 [Available from: <http://www.abep.org/criterio-brasil> accessed 10/08/2017 2017].
19. Barros AJ, Hirakata VN. Alternatives for logistic regression in cross-sectional studies: an empirical comparison of models that directly estimate the prevalence ratio. *BMC Medical Research Methodology* 2003;3(1):1.
20. Espelt A, Mari-Dell'Olmo M, Penelo E, et al. Applied prevalence ratio estimation with different regression models: an example from a cross-national study on substance use research. *Adicciones* 2016;823
21. Victora CG, Huttly SR, Fuchs SC, et al. The role of conceptual frameworks in epidemiological analysis: a hierarchical approach. *Int J Epidemiol* 1997;26(1):224-27.
22. Fotouhi AR. Modelling overdispersion in longitudinal count data in clinical trials with application to epileptic data. *Contemporary Clinical Trials* 2008;29(4):547-54.
23. Norman G, Streiner D. Principal Components and factor analysis. fooling around with factors. biostatistics: the bare essentials: Hamilton: BMJ Publishing Group, 2008.
24. Kim JO, Mueller CW. Factor Analysis: Statistical Methods and Practical Issues: Sage 1978.
25. Kubinger KD. On artificial results due to using factor analysis for dichotomous variables. *Psychology Science* 2003;45(1):106-10.
26. Schäfer I, von Leitner E-C, Schön G, et al. Multimorbidity patterns in the elderly: a new approach of disease clustering identifies complex interrelations between chronic conditions. *PloS One* 2010;5(12):e15941.
27. Palladino R, Tayu Lee J, Ashworth M, et al. Associations between multimorbidity, healthcare utilisation and health status: evidence from 16 European countries. *Age Ageing* 2016;45(3):431-5.
28. Vancampfort D, Koyanagi A, Ward PB, et al. Chronic physical conditions, multimorbidity and physical activity across 46 low-and middle-income countries. *International Journal of Behavioral Nutrition and Physical Activity* 2017;14(1):6.
29. Brasil. Instituto Brasileiro de Geografia e Estatística (IBGE). Censo demográfico de 2010. Amazonas [Available from: <http://www.censo2010.ibge.gov.br/sinopse/index.php?uf=13&dados=4>. accessed 20/01/2016.
30. Pati S, Swain S, Hussain MA, et al. Prevalence and outcomes of multimorbidity in South Asia: a systematic review. *BMJ Open* 2015;5(10):e007235.
31. de Carvalho JN, Roncalli ÂG, de Camargo Cancela M, et al. Prevalence of multimorbidity in the Brazilian adult population according to socioeconomic and demographic characteristics. *PloS One* 2017;12(4):e0174322.
32. Harrison C, Britt H, Miller G, et al. Examining different measures of multimorbidity, using a large prospective cross-sectional study in Australian general practice. *BMJ Open* 2014;4(7):e004694.
33. Pathirana TI, Jackson CA. Socioeconomic status and multimorbidity: a systematic review and meta-analysis. *Australian and New Zealand Journal of Public Health* 2018
34. Tillmann T, Vaucher J, Okbay A, et al. Education and coronary heart disease: mendelian randomisation study. *BMJ (Clinical research ed)* 2017;358:j3542. doi: 10.1136/bmj.j3542 [published Online First: 2017/09/01]

- 1  
2  
3 35. Machado CV, Lima LDD, Baptista TWdF. Health policies in Brazil in times of  
4 contradiction: paths and pitfalls in the construction of a universal system. *Cadernos*  
5 *de saude publica* 2017;33  
6  
7 36. Stuckler D, Reeves A, Loopstra R, et al. Austerity and health: the impact in the UK and  
8 Europe. *European Journal of Public Health* 2017;27(suppl\_4):18-21.  
9  
10 37. Kyriopoulos I-I, Zavras D, Skroumpelos A, et al. Barriers in access to healthcare  
11 services for chronic patients in times of austerity: an empirical approach in Greece.  
12 *International Journal for Equity in Health* 2014;13(1):54.  
13  
14 38. Nunes BP, Camargo-Figuera FA, Guttier M, et al. Multimorbidity in adults from a  
15 southern Brazilian city: occurrence and patterns. *International Journal of Public*  
16 *Health* 2016;61(9):1013-20.  
17  
18 39. Malta DC, Bernal RTI, de Souza MdFM, et al. Social inequalities in the prevalence of  
19 self-reported chronic non-communicable diseases in Brazil: national health survey  
20 2013. *International Journal for Equity in Health* 2016;15(1):153.  
21  
22 40. Araujo MEA, Silva MT, Galvao TF, et al. Prevalence of health services usage and  
23 associated factors in the Amazon region of Brazil: a population-based cross-  
24 sectional study. *BMJ Open* 2017;7(11) doi: 10.1136/bmjopen-2017-017966  
25  
26 41. Nunes BP, Thumé E, Tomasi E, et al. Socioeconomic inequalities in the access to and  
27 quality of health care services. *Revista de Saude Publica* 2014;48(6):968-76.  
28  
29 42. Pati S, Agrawal S, Swain S, et al. Non communicable disease multimorbidity and  
30 associated health care utilization and expenditures in India: cross-sectional study.  
31 *BMC Health Services Research* 2014;14(1):451.  
32  
33 43. Prazeres F, Santiago L. Prevalence of multimorbidity in the adult population attending  
34 primary care in Portugal: a cross-sectional study. *BMJ open* 2015;5(9):e009287.  
35  
36 44. Pang J, Hsu JP, Yeo TW, et al. Diabetes, cardiac disorders and asthma as risk factors  
37 for severe organ involvement among adult dengue patients: A matched case-control  
38 study. *Scientific reports* 2017;7:39872. doi: 10.1038/srep39872 [published Online  
39 First: 2017/01/04]  
40  
41 45. Mirza AMB, Fida M, Murtaza G, et al. Association of metabolic factors with dengue  
42 viral infection on admission triage which predict its clinical course during Lahore  
43 dengue epidemic. *JPMA* 2016;66(1102)  
44  
45 46. Toledo J, George L, Martinez E, et al. Relevance of non-communicable comorbidities  
46 for the development of the severe forms of dengue: a systematic literature review.  
47 *PLoS Neglected Tropical Diseases* 2016;10(1):e0004284.  
48  
49 47. Htun NSN, Odermatt P, Eze IC, et al. Is diabetes a risk factor for a severe clinical  
50 presentation of dengue?-review and meta-analysis. *PLoS Neglected Tropical*  
51 *Diseases* 2015;9(4):e0003741.  
52  
53  
54  
55  
56  
57  
58  
59  
60

1  
2  
3  
4  
5  
6  
7  
8  
9  
10  
11  
12  
13  
14  
15  
16  
17  
18  
19  
20  
21  
22  
23  
24  
25  
26  
27  
28  
29  
30  
31  
32  
33  
34  
35  
36  
37  
38  
39  
40  
41  
42  
43  
44  
45  
46  
47  
48  
49  
50  
51  
52  
53  
54  
55  
56  
57  
58  
59  
60

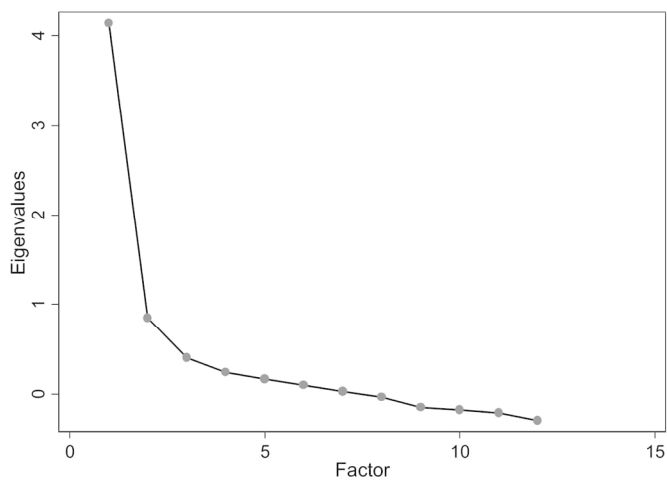

Figure 1 - Scree plot for women

Note: One factor was identified according to the inflection point in the curve (eigenvalue >1)

599x776mm (72 x 72 DPI)

1  
2  
3  
4  
5  
6  
7  
8  
9  
10  
11  
12  
13  
14  
15  
16  
17  
18  
19  
20  
21  
22  
23  
24  
25  
26  
27  
28  
29  
30  
31  
32  
33  
34  
35  
36  
37  
38  
39  
40  
41  
42  
43  
44  
45  
46  
47  
48  
49  
50  
51  
52  
53  
54  
55  
56  
57  
58  
59  
60

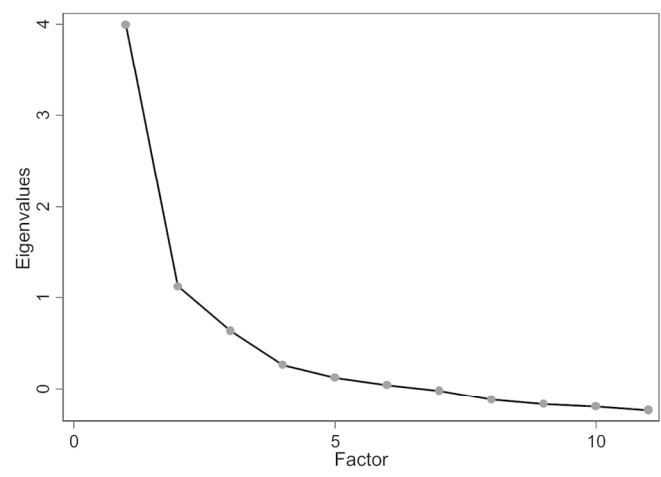

Figure 2 - Scree plot for men  
Note: Two factors were identified according to the inflection point in the curve (eigenvalue >1)

599x776mm (72 x 72 DPI)

**STROBE 2007 (v4) checklist of items to be included in reports of observational studies in epidemiology\***  
**Checklist for cohort, case-control, and cross-sectional studies (combined)**

| Section/Topic             | Item # | Recommendation                                                                                                                                                                                                                                                                                                                                                                                                                                                         | Reported on page # |
|---------------------------|--------|------------------------------------------------------------------------------------------------------------------------------------------------------------------------------------------------------------------------------------------------------------------------------------------------------------------------------------------------------------------------------------------------------------------------------------------------------------------------|--------------------|
| Title and abstract        | 1      | (a) Indicate the study's design with a commonly used term in the title or the abstract                                                                                                                                                                                                                                                                                                                                                                                 | 1                  |
|                           |        | (b) Provide in the abstract an informative and balanced summary of what was done and what was found                                                                                                                                                                                                                                                                                                                                                                    | 1,2                |
| <b>Introduction</b>       |        |                                                                                                                                                                                                                                                                                                                                                                                                                                                                        |                    |
| Background/rationale      | 2      | Explain the scientific background and rationale for the investigation being reported                                                                                                                                                                                                                                                                                                                                                                                   | 3                  |
| Objectives                | 3      | State specific objectives, including any pre-specified hypotheses                                                                                                                                                                                                                                                                                                                                                                                                      | 3                  |
| <b>Methods</b>            |        |                                                                                                                                                                                                                                                                                                                                                                                                                                                                        |                    |
| Study design              | 4      | Present key elements of study design early in the paper                                                                                                                                                                                                                                                                                                                                                                                                                | 3,4                |
| Setting                   | 5      | Describe the setting, locations, and relevant dates, including periods of recruitment, exposure, follow-up, and data collection                                                                                                                                                                                                                                                                                                                                        | 4                  |
| Participants              | 6      | (a) <i>Cohort study</i> —Give the eligibility criteria, and the sources and methods of selection of participants. Describe methods of follow-up<br><i>Case-control study</i> —Give the eligibility criteria, and the sources and methods of case ascertainment and control selection. Give the rationale for the choice of cases and controls<br><i>Cross-sectional study</i> —Give the eligibility criteria, and the sources and methods of selection of participants | 4                  |
|                           |        | (b) <i>Cohort study</i> —For matched studies, give matching criteria and number of exposed and unexposed<br><i>Case-control study</i> —For matched studies, give matching criteria and the number of controls per case                                                                                                                                                                                                                                                 | -                  |
| Variables                 | 7      | Clearly define all outcomes, exposures, predictors, potential confounders, and effect modifiers. Give diagnostic criteria, if applicable                                                                                                                                                                                                                                                                                                                               | 4                  |
| Data sources/ measurement | 8*     | For each variable of interest, give sources of data and details of methods of assessment (measurement). Describe comparability of assessment methods if there is more than one group                                                                                                                                                                                                                                                                                   | 4                  |
| Bias                      | 9      | Describe any efforts to address potential sources of bias                                                                                                                                                                                                                                                                                                                                                                                                              | 4                  |
| Study size                | 10     | Explain how the study size was arrived at                                                                                                                                                                                                                                                                                                                                                                                                                              | -                  |
| Quantitative variables    | 11     | Explain how quantitative variables were handled in the analyses. If applicable, describe which groupings were chosen and why                                                                                                                                                                                                                                                                                                                                           | 4                  |
| Statistical methods       | 12     | (a) Describe all statistical methods, including those used to control for confounding                                                                                                                                                                                                                                                                                                                                                                                  | 5                  |
|                           |        | (b) Describe any methods used to examine subgroups and interactions                                                                                                                                                                                                                                                                                                                                                                                                    | -                  |
|                           |        | (c) Explain how missing data were addressed                                                                                                                                                                                                                                                                                                                                                                                                                            | -                  |
|                           |        | (d) <i>Cohort study</i> —If applicable, explain how loss to follow-up was addressed<br><i>Case-control study</i> —If applicable, explain how matching of cases and controls was addressed                                                                                                                                                                                                                                                                              | 4                  |



|                          |     |                                                                                                                                                                                                              |           |
|--------------------------|-----|--------------------------------------------------------------------------------------------------------------------------------------------------------------------------------------------------------------|-----------|
|                          |     | <i>Cross-sectional study</i> —If applicable, describe analytical methods taking account of sampling strategy                                                                                                 |           |
|                          |     | (e) Describe any sensitivity analyses                                                                                                                                                                        | -         |
| <b>Results</b>           |     |                                                                                                                                                                                                              |           |
| Participants             | 13* | (a) Report numbers of individuals at each stage of study—eg numbers potentially eligible, examined for eligibility, confirmed eligible, included in the study, completing follow-up, and analysed            | 6         |
|                          |     | (b) Give reasons for non-participation at each stage                                                                                                                                                         | -         |
|                          |     | (c) Consider use of a flow diagram                                                                                                                                                                           | na        |
| Descriptive data         | 14* | (a) Give characteristics of study participants (eg demographic, clinical, social) and information on exposures and potential confounders                                                                     | 6         |
|                          |     | (b) Indicate number of participants with missing data for each variable of interest                                                                                                                          | -         |
|                          |     | (c) <i>Cohort study</i> —Summarise follow-up time (eg, average and total amount)                                                                                                                             | -         |
| Outcome data             | 15* | <i>Cohort study</i> —Report numbers of outcome events or summary measures over time                                                                                                                          | -         |
|                          |     | <i>Case-control study</i> —Report numbers in each exposure category, or summary measures of exposure                                                                                                         | -         |
|                          |     | <i>Cross-sectional study</i> —Report numbers of outcome events or summary measures                                                                                                                           | 6         |
| Main results             | 16  | (a) Give unadjusted estimates and, if applicable, confounder-adjusted estimates and their precision (eg, 95% confidence interval). Make clear which confounders were adjusted for and why they were included | 7,8,9     |
|                          |     | (b) Report category boundaries when continuous variables were categorized                                                                                                                                    | 6         |
|                          |     | (c) If relevant, consider translating estimates of relative risk into absolute risk for a meaningful time period                                                                                             | -         |
| Other analyses           | 17  | Report other analyses done—eg analyses of subgroups and interactions, and sensitivity analyses                                                                                                               | -         |
| <b>Discussion</b>        |     |                                                                                                                                                                                                              |           |
| Key results              | 18  | Summarise key results with reference to study objectives                                                                                                                                                     | 10 and 12 |
| Limitations              | 19  | Discuss limitations of the study, taking into account sources of potential bias or imprecision. Discuss both direction and magnitude of any potential bias                                                   | 12        |
| Interpretation           | 20  | Give a cautious overall interpretation of results considering objectives, limitations, multiplicity of analyses, results from similar studies, and other relevant evidence                                   | 13,14     |
| Generalisability         | 21  | Discuss the generalisability (external validity) of the study results                                                                                                                                        | 14,15     |
| <b>Other information</b> |     |                                                                                                                                                                                                              |           |
| Funding                  | 22  | Give the source of funding and the role of the funders for the present study and, if applicable, for the original study on which the present article is based                                                | 16        |

\*Give information separately for cases and controls in case-control studies and, if applicable, for exposed and unexposed groups in cohort and cross-sectional studies.

**Note:** An Explanation and Elaboration article discusses each checklist item and gives methodological background and published examples of transparent reporting. The STROBE checklist is best used in conjunction with this article (freely available on the Web sites of PLoS Medicine at <http://www.plosmedicine.org/>, Annals of Internal Medicine at <http://www.annals.org/>, and Epidemiology at <http://www.epidem.com/>). Information on the STROBE Initiative is available at [www.strobe-statement.org](http://www.strobe-statement.org).

# BMJ Open

## Prevalence and patterns of multimorbidity in Amazon Region of Brazil and associated determinants: a cross-sectional study

|                                 |                                                                                                                                                                                                                                                                                                                                                                                                                                                                                                                                         |
|---------------------------------|-----------------------------------------------------------------------------------------------------------------------------------------------------------------------------------------------------------------------------------------------------------------------------------------------------------------------------------------------------------------------------------------------------------------------------------------------------------------------------------------------------------------------------------------|
| Journal:                        | <i>BMJ Open</i>                                                                                                                                                                                                                                                                                                                                                                                                                                                                                                                         |
| Manuscript ID                   | bmjopen-2018-023398.R1                                                                                                                                                                                                                                                                                                                                                                                                                                                                                                                  |
| Article Type:                   | Research                                                                                                                                                                                                                                                                                                                                                                                                                                                                                                                                |
| Date Submitted by the Author:   | 12-Jun-2018                                                                                                                                                                                                                                                                                                                                                                                                                                                                                                                             |
| Complete List of Authors:       | Araujo, Elizete; University of Brasilia, Post-Graduate Program Health Sciences; Federal University of Amazonas, Getulio Vargas University Hospital<br>Silva, Marcus; Federal University of Amazonas, Faculty Medicine; University of Sorocaba, Post- Graduate Program of Pharmaceutical Science<br>Galvao, Tais; State University of Campinas, Faculty of Pharmaceutical Sciences<br>Nunes, BP; Federal University of Pelotas, Department of Nursing in Public Health<br>Pereira, Mauricio; University of Brasilia, Faculty of Medicine |
| <b>Primary Subject Heading</b>: | Health services research                                                                                                                                                                                                                                                                                                                                                                                                                                                                                                                |
| Secondary Subject Heading:      | Epidemiology, Health policy, Health services research                                                                                                                                                                                                                                                                                                                                                                                                                                                                                   |
| Keywords:                       | Prevalence, Multimorbidity, Cross-Sectional Studies, Population Surveys, Brazil                                                                                                                                                                                                                                                                                                                                                                                                                                                         |
|                                 |                                                                                                                                                                                                                                                                                                                                                                                                                                                                                                                                         |

SCHOLARONE™  
Manuscripts

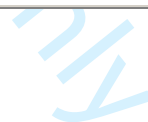

1  
2  
3 **Prevalence and patterns of multimorbidity in Amazon Region of Brazil and associated**  
4 **determinants: a cross-sectional study**  
5

6 Corresponding author

7  
8 Maria Elizete de Almeida Araujo

9  
10 University of Brasilia, Health Sciences Graduate Program, Faculty of Medicine

11  
12 Conj. 16, Sala 77, Asa Norte, Brasília-DF, Brasil

13  
14 70910-900 Campus Universitário Darcy Ribeiro Phone +55 (92) 36563374

15  
16 E-mail: [elizetemanaus@gmail.com](mailto:elizetemanaus@gmail.com)

17  
18 Authors

19  
20 Maria Elizete de Almeida Araujo, Post-Graduate Program Health Sciences, University of  
21 Brasília, PhD

22  
23 Getulio Vargas University Hospital, Federal University of Amazonas.

24  
25 Marcus Tolentino Silva, Faculty of Medicine, Federal University of Amazonas, Manaus,  
26 Amazonas, Brazil, Assistant Professor.

27  
28 Post-Graduate Program of Pharmaceutical Sciences, University of Sorocaba, Sorocaba, Sao  
29 Paulo, Brazil, Assistant Professor.

30  
31 Tais Freire Galvao, Faculty of Pharmaceutical Sciences, State University of Campinas,  
32 Campinas, Sao Paulo, Brazil, Assistant Professor

33  
34 Bruno P Nunes, Department of Nursing in Public Health, Federal University of Pelotas,  
35 Pelotas, Rio Grande do Sul, Brazil, Assistant Professor

36  
37 Mauricio G. Pereira, Faculty of Medicine, University of Brasilia, Federal District, Brazil,  
38 Full Professor.

39  
40  
41 **Abbreviated running title:** Multimorbidity in Amazonas Region

42  
43 Word count: 2999

44  
45 **ABSTRACT**

46  
47 **Objectives:** To estimate the prevalence of multimorbidity and to identify factors associated  
48 with it in the adult population from the metropolitan region of Manaus.

49  
50 **Design:** Cross-sectional population-based study.

51  
52 **Setting:** Interviews conducted between May and August of 2015 in eight cities that  
53 compose the metropolitan region of Manaus, Amazonas, Brazil.

54  
55 **Participants:** 4000 adults aged  $\geq 18$  years  
56  
57  
58  
59  
60

1  
2  
3 **Primary outcome measures:** Multimorbidity, measured by the occurrence of  $\geq 2$  and  $\geq 3$   
4 chronic diseases, was the primary outcome. The associated factors were investigated by  
5 calculating the prevalence ratio (PR) obtained by Poisson regression, with robust  
6 adjustment of the variance in a hierarchical model. A factor analysis was conducted to  
7 investigate multimorbidity clusters.  
8  
9

10  
11 **Results:** Half of the interviewees were women. The presence of a chronic disease was  
12 reported by 57.2% (95% CI 56.6% to 59.7%) of the interviewees, and the mean morbidity  
13 was 1.2 (1.1-1.2); 29.0% (95% CI 27.6% to 30.5%) reported  $\geq 2$  morbidities, and 15.2%  
14 (95% CI 14.1% to 16.4%) reported  $\geq 3$  chronic conditions. Back pain was reported by one-  
15 third of the interviewees. Multimorbidity was higher in women PR = 1.66 (95% CI 1.50 to  
16 1.83), the elderly, PR = 5.68 (95% CI 4.51 to 7.15) and individuals with worse health  
17 perception, PR = 3.70 (95% CI 2.73-5.00). Associated factors also included undergoing  
18 medical consultations, hospitalization in the last year, suffering from dengue in the last year  
19 and using a reference health service. Factor analysis revealed a pattern of multimorbidity in  
20 women. The factor loading the most strength of association in women was heart disease. In  
21 men, an association was identified in two groups and lung disease was disease with higher  
22 factorial loading.  
23  
24

25 **Conclusion:** Multimorbidity was frequent in the metropolitan region of Manaus. It  
26 occurred more in women, in the elderly and in those with worse health perception.  
27

28 **Keywords:** Prevalence, Multimorbidity, Cross-Sectional Studies, Population Surveys,  
29 Brazil.  
30

#### 31 **Strengths and limitations of this study:**

32 This is the first study on the prevalence of multimorbidity in adults from the metropolitan  
33 region of Manaus, Amazonas, Brazil, using data from a population-based survey.  
34

35 We used probabilistic complex sampling in three stages: census track, household and  
36 individual to include 4001 adults living in one of the eight cities of the metropolitan region.  
37 This research increases the knowledge about the epidemiologic factors associated with  
38 multimorbidity.  
39

40 The measurement method of the outcome, self-report, is subject to errors and influenced by  
41 memory bias.  
42  
43  
44  
45  
46  
47  
48  
49  
50

## BACKGROUND

Multimorbidity is the occurrence of different chronic clinical conditions in an individual, without a single condition being considered the main cause.<sup>1 2</sup> It is operationally defined as the occurrence of two or more chronic diseases.<sup>3-5</sup> In recent decades, population ageing, lifestyle changes, improved socio-economic conditions, and increased diagnostic ability of health services have contributed to a significant rise in the population that survives serious diseases, causing an accumulation of health problems in specific population groups. This situation has contributed to the increased prevalence of multimorbidity.<sup>6-8</sup>

The multimorbidity frequency varies according to the evaluated diseases, the age of the population, the individual's socioeconomic and demographic level, and the individual's health condition. The rising prevalence of multimorbidity has resulted in higher costs to health services.<sup>9-12</sup> The costs associated with multimorbidity can reach 75% of total health expenditures, which includes physician consultation, hospitalization, odontological care, medication and rehabilitation.<sup>13</sup>

In Brazil, the 2013 National Health Survey (*Pesquisa Nacional de Saúde*), including 64 308 individuals over 18 years old, and the most extensive evidence on population multimorbidity, has identified that the prevalence of multimorbidity was 26% to 29% in the southern region and 14% to 19% in the northern region.<sup>14</sup> Studies in specific populations conducted on the south and southeast regions identified higher multimorbidity prevalence in women and elderly.<sup>15 16</sup> The differences found suggest heterogeneity in socioeconomic development.<sup>17</sup> However, there is a lack of studies on the north region to identify more susceptible groups and expand our knowledge about multimorbidity at the local level.

The present research estimated the prevalence of and identified the factors associated with multimorbidity in the adult population of the metropolitan region of Manaus, the most populated region and largest economic cluster in northern Brazil.

## METHODS

### Study design

This is a cross-sectional population-based study in the metropolitan region of Manaus, composed by the capital of Amazonas, Manaus, and seven surrounding cities.

Multimorbidity was considered a primary outcome, which was categorized as  $\geq 2$  or  $\geq 3$  chronic diseases. The present analysis is part of a larger study, which aimed to study the use of health services and inputs in the region from May to August 2015.<sup>18</sup>

### **Participants and study size**

We calculated the sample size as 4000 adults  $\geq 18$  years old to be interviewed, who were selected by probabilistic complex sampling—by cluster and stratified by sex and age—in three stages (census track, household and individual).<sup>18</sup> We assume an estimated 50% prevalence of use of health services, considering a CI of 95%, accuracy of 2% and a design effect value of 1.5.<sup>19</sup> We added 10% to compensate for possible losses and refusals.

### **Variables and data collection**

The primary outcome was self-reported multimorbidity, defined as two or more affirmative answers to any of the following questions: "Have any doctors ever diagnosed you with [...]?" [1] hypertension, [2] diabetes, [3] high cholesterol, [4] heart disease (heart attack, angina, heart failure or other), [5] stroke, [6] asthma or asthmatic bronchitis, [7] arthritis or rheumatism, [8] depression, [9] pulmonary disease (pulmonary emphysema, chronic bronchitis or chronic obstructive pulmonary disease), [10] cancer, or [11] chronic kidney disease, and [12] "Do you have any chronic spinal problems, such as chronic back or neck pain, low back pain, sciatic pain, vertebral or disc problems?" These questions were previously used in the National Health Survey.<sup>20</sup>

The independent variables were sex; age (18 to 24; 25 to 34; 35 to 44; 45 to 59 and  $\geq 60$  years);<sup>21</sup> marital status; self-reported skin colour; education; social class;<sup>22</sup> occupation; private health insurance (yes, no); self-perception of health status; place of attendance (capital, countryside); using a reference health service, that is, use of the same healthcare professional for attendance (yes, no); physician visit in the last 12 months (yes, no); hospitalization in the last year (yes, no); malaria in the last 12 months (yes, no); dengue in the last 12 months (yes, no); and types of services one usually seeks when in need of medical care (primary, secondary, or tertiary).

Interviewers with experience in conducting home interviews collected the data on a mobile electronic device (Samsung® Galaxy Tab3 SM-T110). Interview records were transmitted over the Internet and stored using Survey To Go software (Dooblo Ltd., Israel).

### **Statistical analyses**

1  
2  
3 Statistical analyses were carried out in Stata v. 14.2. In all calculations, the complex  
4 sampling design was weighted by incorporating sample weights (*svy* command).

5  
6 Descriptive statistics were initially obtained through prevalence calculation. The  
7  
8 respective confidence intervals and P values of difference were calculated by Pearson's chi-  
9  
10 square between sociodemographic characteristics and multimorbidity. The prevalence of  
11  
12 the most common diseases stratified by sex, age group and multimorbidity was also  
13  
14 calculated. At this stage, morbidities with a prevalence of <5% were excluded.

15  
16 Bivariate analyses were performed between all independent and dependent variables  
17  
18 to calculate prevalence ratios (PRs) and 95% confidence intervals (CIs). To identify the  
19  
20 factors associated with multimorbidity, PRs were adjusted using Poisson regression with  
21  
22 robust variance adjustment.<sup>23-25</sup>

23  
24 A hierarchical model consisting of three blocks was constructed of the most distal to  
25  
26 the most proximal determinants of multimorbidity: (1) demographic variables (sex, age,  
27  
28 race, marital status); (2) socioeconomic variables (economic, education classification,  
29  
30 occupation); and (3) health variables (private health insurance, health status, demand for the  
31  
32 same health service, physician visit, hospitalization, dengue, malaria and type of service  
33  
34 usually used). The variables from the first block were kept for the next stage if they  
35  
36 presented a p-value  $\leq 0.05$ . Multicollinearity among the independent variables was  
37  
38 discarded by assessing the variance inflation factors.<sup>26</sup>

39  
40 To analyse whether the diseases grouped in patterns, an exploratory factor analysis  
41  
42 was conducted, stratified by sex.<sup>27 28</sup> This technique allowed us to identify the tendency of  
43  
44 coexisting diseases and to select a set of variables with potentially common causal factors,  
45  
46 such as interaction between diseases and/or their treatments and/or common risk factors,  
47  
48 which were interpreted as multimorbidity patterns. The tetrachoric correlation coefficient  
49  
50 was used in the analysis because it is better than Pearson's correlation coefficient for  
51  
52 dichotomous outcomes.<sup>29</sup> The suitability of the sampling was evaluated by the Kaiser-  
53  
54 Meyer-Olkin test (KMO), which was considered adequate if the index was  $\geq 0.70$ , and the  
55  
56 Bartlett sphericity test, which was considered adequate if its p-value was  $\leq 0.05$ .<sup>27 30</sup> To  
57  
58 establish the number of factors to be maintained, Cattell's graphic (Cattell's scree plot) was  
59  
60 used, which represents the eigenvalues of the correlation matrix in descending order. The  
factor number extracted corresponds to the eigenvalue that produces the inflection point in

1  
2  
3 the curve (eigenvalue > 1) and explains the minimum variance (>10% for each component).  
4 Variables were defined as being associated with a factor if they presented loads  $\geq 0.30$  <sup>27</sup>  
5 (the closer to 1, the greater the association). Oblique rotation (promax) was performed to  
6 allow for better interpretation of the factor analysis.<sup>27</sup>  
7  
8  
9

### 10 **Patient and public involvement**

11 Patients and public were not involved in the design of the research question nor were they  
12 involved in developing plans for design or implementation of the study. The study had no  
13 patient advisers. Outcomes were self-reported by patients based on pre-defined questions.  
14 Due to the cross-sectional nature of the study, a feedback of the results was not planned to  
15 those involved.  
16  
17  
18  
19  
20  
21

## 22 **RESULTS**

### 23 **Participant characteristics**

24 Table 1 shows the characteristics of the participants and the prevalence of  
25 multimorbidity. The sample was composed of 4001 adults and had a response rate of 76%.  
26 Women constituted over half of the sample. About one-half of the interviewees were  
27 between 25 and 44 years old, and 81% were black, brown or indigenous. The predominant  
28 social stratum was the lower middle class (57%), and about one-third of the participants  
29 were students or housewives. More than half reported good health (54%), and the majority  
30 had had a physician visit in the last year (76%). In the last 12 months, 7% reported dengue  
31 and 6% reported malaria. One-half of respondents reported seeking a tertiary health service  
32 when they needed care (47%).  
33  
34  
35  
36  
37  
38  
39  
40

### 41 **Prevalence of multimorbidity**

42 The prevalence of at least one chronic disease was 57.2% (95% CI 56.6 to 58.7%),  
43 with a mean of  $1.2 \pm 1.5$  diseases. The prevalence of  $\geq 2$  chronic conditions was 29% (95%  
44 CI 27.6 to 30.5%) and  $\geq 3$  chronic diseases was 15.2% (95% CI 14.1 to 16.4%). Higher  
45 prevalence was observed in women, in widowers, in individuals with lower education, in  
46 retired individuals, in individuals who had the worst perceptions of health and in those who  
47 visited a doctor and were hospitalized in the last year (Table 1). The mean of any chronic  
48 disease and the multimorbidity increased with age ( $0.5 \pm 0.8$  in the 18 to 24 year-old group  
49  
50  
51  
52  
53  
54  
55  
56  
57  
58  
59  
60



1  
2  
3 and  $2.5 \pm 1.9$  in those 60 years or above). In the previous year, dengue was reported by  
4  
5 44% of those who had two or more chronic conditions.

6 About half of women aged 35 to 59 years reported  $\geq 2$  morbidities (Table 2). Back  
7  
8 pain was the most reported health problem in both women and men.  
9

10  
11  
12  
13  
14  
15  
16  
17  
18  
19  
20  
21  
22  
23  
24  
25  
26  
27  
28  
29  
30  
31  
32  
33  
34  
35  
36  
37  
38  
39  
40  
41  
42  
43  
44  
45  
46  
47  
48  
49  
50  
51  
52  
53  
54  
55  
56  
57  
58  
59  
60

For peer review only

Table 1. Characteristics of participants and prevalence of multimorbidity (%), Manaus metropolitan region, Brazil, 2015 (n= 4001)\*

| Variable                  | % (n)       | Any chronic disease % (95% CI) | P value | Mean number of chronic health problems (95% CI) | Multimorbidity % (95% CI) |         |                     |         |
|---------------------------|-------------|--------------------------------|---------|-------------------------------------------------|---------------------------|---------|---------------------|---------|
|                           |             |                                |         |                                                 | ≥2                        | P value | ≥3                  | P value |
| Overall                   |             | 57.2 (55.6 to 58.7)            |         | 1.17 (1.1 to 1.2)                               | 29.0 (27.6 to 30.5)       |         | 15.2 (14.1 to 16.4) |         |
| Sex                       |             |                                | <0.001  |                                                 |                           | <0.001  |                     | <0.001  |
| Male                      | 47.2 (1888) | 52.1 (49.8 to 54.0)            |         | 0.9 (0.8 to 0.9)                                | 21.5 (19.7 to 23.4)       |         | 9.3 (8.1 to 10.7)   |         |
| Female                    | 52.7 (2113) | 61.8 (59.7 to 63.8)            |         | 1.39 (1.3 to 1.4)                               | 35.8 (33.8 to 37.8)       |         | 20.5 (18.8 to 22.3) |         |
| Age (years)               |             |                                | <0.001  |                                                 |                           | <0.001  |                     | <0.001  |
| 18 to 24                  | 20.8 (838)  | 37.0 (33.8 to 40.3)            |         | 0.5 (0.4 to 0.5)                                | 9.8 (7.9 to 12.0)         |         | 3.5 (2.5 to 5.0)    |         |
| 25 to 34                  | 28.7 (1152) | 49.6 (46.7 to 52.5)            |         | 0.8 (0.7 to 0.8)                                | 18.6 (16.4 to 20.9)       |         | 6.9 (5.6 to 8.5)    |         |
| 35 to 44                  | 21.1 (843)  | 61.0 (57.6 to 64.2)            |         | 1.1 (1.0 to 1.2)                                | 30.0 (27.0 to 33.2)       |         | 12.7 (10.6 to 15.1) |         |
| 45 to 59                  | 19.3 (772)  | 71.4 (68.0 to 74.4)            |         | 1.7 (1.6 to 1.8)                                | 46.6 (43.1 to 50.2)       |         | 28.1 (25.1 to 31.4) |         |
| ≥60                       | 9.9 (396)   | 86.1 (82.3 to 89.2)            |         | 2.5 (2.3 to 2.7)                                | 63.5 (58.6 to 68.1)       |         | 44.4 (39.6 to 49.3) |         |
| Marital status            |             |                                | <0.001  |                                                 |                           | <0.001  |                     | <0.001  |
| Single                    | 54.2 (2173) | 51.5 (49.3 to 53.5)            |         | 0.9 (0.8 to 0.9)                                | 20.8 (19.1 to 22.6)       |         | 10.3 (8.8 to 11.3)  |         |
| Married                   | 35.2 (1409) | 62.0 (59.4 to 64.5)            |         | 1.3 (1.2 to 1.4)                                | 35.3 (32.9 to 37.9)       |         | 19.6 (17.6 to 21.8) |         |
| Separated/Divorced        | 6.5 (260)   | 65.6 (59.6 to 71.2)            |         | 1.5 (1.3 to 1.7)                                | 42.6 (36.8 to 48.7)       |         | 19.9 (15.5 to 25.2) |         |
| Widower                   | 4.0 (159)   | 79.3 (72.3 to 84.9)            |         | 2.2 (1.9 to 2.5)                                | 63.1 (55.3 to 70.2)       |         | 39.9 (32.5 to 47.7) |         |
| Skin colour               |             |                                | <0.001  |                                                 |                           | 0.0021  |                     | 0.0016  |
| White/yellow              | 19.3 (774)  | 51.7 (48.2 to 55.2)            |         | 1.1 (1.0 to 1.2)                                | 27.1 (24.1 to 30.4)       |         | 15.7 (13.3 to 18.5) |         |
| Black/brown/indigenous    | 80.5 (3227) | 58.5 (56.8 to 60.2)            |         | 1.2 (1.1 to 1.2)                                | 29.5 (27.9 to 31.1)       |         | 15.1 (13.9 to 16.4) |         |
| Schooling level           |             |                                | <0.001  |                                                 |                           | <0.001  |                     | <0.001  |
| High education or above§  | 3.9 (158)   | 57.1 (49.3 to 64.6)            |         | 1.2 (1.0 to 1.5)                                | 32.6 (25.7 to 40.4)       |         | 16.1 (11.7 to 23.7) |         |
| High school               | 47.5 (1903) | 51.0 (48.8 to 53.3)            |         | 0.9 (0.8 to 1.0)                                | 22.5 (20.7 to 24.5)       |         | 9.0 (7.8 to 10.4)   |         |
| Middle school             | 16.2 (649)  | 50.0 (46.2 to 53.8)            |         | 0.9 (0.8 to 1.0)                                | 21.1 (18.2 to 24.4)       |         | 10.7 (0.8 to 13.3)  |         |
| Elementary school or less | 32.2 (1291) | 69.9 (67.4 to 72.4)            | <0.001  | 1.7 (1.6 to 1.8)                                | 42.1 (39.5 to 44.8)       |         | 26.5 (24.1 to 28.9) |         |
| Economic classification†  |             |                                |         |                                                 |                           | <0.001  |                     | <0.001  |
| A - B                     | 15.7 (629)  | 51.2 (47.2 to 55.1)            |         | 0.9 (0.8 to 1.1)                                | 24.6 (21.4 to 28.2)       |         | 11.1 (8.8 to 13.8)  |         |
| C                         | 57.1 (2285) | 55.5 (53.4 to 57.5)            |         | 1.0 (1.0 to 1.1)                                | 26.1 (24.3 to 27.9)       |         | 13.2 (11.9 to 14.7) |         |
| D - E                     | 27.2 (1087) | 64.3 (61.4 to 67.2)            |         | 1.5 (1.4 to 1.6)                                | 37.7 (34.9 to 40.7)       |         | 21.8 (19.4 to 24.3) |         |
| Occupation                |             |                                | <0.001  |                                                 |                           | <0.001  |                     | <0.001  |

| Variable                 | % (n)       | Any chronic disease % (95% CI) | P value | Mean number of chronic health problems (95% CI) | Multimorbidity % (95% CI) |         |                     |         |
|--------------------------|-------------|--------------------------------|---------|-------------------------------------------------|---------------------------|---------|---------------------|---------|
|                          |             |                                |         |                                                 | ≥2                        | P value | ≥3                  | P value |
| Formal job               | 19.0 (761)  | 52.7 (49.1 to 56.2)            |         | 0.9 (0.8 to 1.0)                                | 22.7 (19.8 to 25.8)       |         | 9.2 (7.3 to 11.5)   |         |
| Informal job             | 28.7 (1149) | 55.9 (53.0 to 58.7)            |         | 1.0 (1.0 to 1.1)                                | 27.6 (25.1 to 30.3)       |         | 12.9 (11.1 to 15.0) |         |
| Retired                  | 7.9 (315)   | 79.2 (74.3 to 83.3)            |         | 2.4 (2.2 to 2.6)                                | 60.5 (55.4 to 65.8)       |         | 43.4 (38.0 to 49.0) |         |
| Student/ housewife       | 29.8 (1199) | 55.0 (52.2 to 57.8)            |         | 1.1 (1.1 to 1.2)                                | 29.0 (25.5 to 31.6)       |         | 15.8 (13.8 to 18.0) |         |
| Unemployed               | 14.4 (577)  | 58.3 (54.2 to 62.3)            |         | 1.0 (0.9 to 1.1)                                | 23.1 (19.8 to 26.7)       |         | 11.2 (8.9 to 14.1)  |         |
| Private health insurance |             |                                | 0.348   |                                                 |                           | 0.697   |                     | 0.616   |
| Yes                      | 13.0 (523)  | 55.3 (51.0 to 59.5)            |         | 1.0 (0.9 to 1.29)                               | 28.0 (24.6 to 32.3)       |         | 14.5 (11.7 to 17.8) |         |
| No                       | 87.0 (3478) | 57.5 (55.8 to 59.1)            |         | 1.2 (1.1 to 1.2)                                | 29.0 (27.6 to 30.7)       |         | 15.3 (14.2 to 16.6) |         |
| Health status            |             |                                | <0.001  |                                                 |                           | <0.001  |                     | <0.001  |
| Very good                | 11.9 (471)  | 30.8 (26.8 to 35.2)            |         | 0.4 (0.47 to 0.5)                               | 9.7 (7.3 to 12.7)         |         | 3.1 (1.9 to 5.1)    |         |
| Good                     | 54.3 (2175) | 50.4 (48.3 to 52.5)            |         | 0.8 (0.8 to 0.9)                                | 20.3 (18.7 to 22.0)       |         | 7.9 (6.8 to 9.1)    |         |
| Fair                     | 27.7 (1108) | 75.1 (72.5 to 77.5)            |         | 1.7 (1.6 to 1.8)                                | 45.2 (42.3 to 48.1)       |         | 26.0 (23.5 to 28.6) |         |
| Bad                      | 4.8 (193)   | 88.6 (83.2 to 93.3)            |         | 2.6 (2.4 to 2.9)                                | 68.4 (61.6 to 74.6)       |         | 50.3 (43.3 to 57.3) |         |
| Very bad                 | 1.3 (54)    | 81.5 (68.9 to 89.7)            |         | 3.6 (3.0 to 4.3)                                | 77.7 (64.8 to 86.9)       |         | 70.3 (57.0 to 81.0) |         |
| City                     |             |                                | <0.001  |                                                 |                           | <0.001  |                     | <0.001  |
| Capital                  | 86.8 (3479) | 58.4 (56.8 to 60.0)            |         | 1.2 (1.1 to 1.2)                                | 30.2 (28.7 to 31.7)       |         | 15.8 (14.6 to 17.1) |         |
| Countryside              | 13.1 (522)  | 49.2 (44.9 to 53.5)            |         | 0.9 (0.8 to 1.0)                                | 21.5 (18.2 to 25.3)       |         | 11.3 (0.8 to 14.3)  |         |
| Health reference         |             |                                | <0.001  |                                                 |                           | <0.001  |                     | <0.001  |
| Yes                      | 60.7 (2434) | 62.3 (60.3 to 64.2)            |         | 1.3 (1.2 to 1.4)                                | 34.4 (31.5 to 36.3)       |         | 18.7 (17.1 to 20.3) |         |
| No                       | 39.2 (1567) | 49.4 (46.9 to 51.9)            |         | 0.9 (0.8 to 0.9)                                | 20.8 (18.9 to 22.9)       |         | 9.8 (17.2 to 20.3)  |         |
| Physician visit          |             |                                | <0.001  |                                                 |                           | <0.001  |                     | <0.001  |
| Yes                      | 76.5 (3066) | 60.8 (59.0 to 62.5)            |         | 1.2 (1.2 to 1.3)                                | 32.1 (30.5 to 33.8)       |         | 17.4 (16.1 to 18.8) |         |
| No                       | 23.4 (935)  | 45.5 (42.3 to 48.7)            |         | 0.8 (0.7 to 0.9)                                | 18.9 (16.5 to 21.5)       |         | 8.2 (6.6 to 10.2)   |         |
| Hospitalization          |             |                                | <0.001  |                                                 |                           | <0.001  |                     | <0.001  |
| Yes                      | 7.0 (273)   | 72.9 (67.3 to 77.8)            |         | 1.2 (1.2 to 1.3)                                | 47.2 (41.4 to 53.2)       |         | 28.1 (23.1 to 33.8) |         |
| No                       | 93.0 (3728) | 56.1 (67.3 to 77.8)            |         | 0.8 (0.7 to 0.9)                                | 27.7 (26.3 to 29.2)       |         | 14.3 (13.2 to 15.4) |         |
| Dengue                   |             |                                | 0.002   |                                                 |                           | <0.001  |                     | <0.001  |
| Yes                      | 7.0 (281)   | 65.9 (60.1 to 71.2)            |         | 1.6 (1.4 to 1.8)                                | 44.2 (38.5 to 50.1)       |         | 27.6 (22.7 to 33.1) |         |
| No                       | 93.0 (3720) | 56.5 (54.9 to 58.1)            |         | 1.1 (1.0 to 1.1)                                | 27.9 (26.5 to 29.3)       |         | 14.3 (13.2 to 15.5) |         |
| Malaria                  |             |                                | 0.420   |                                                 |                           | 0.122   |                     | 0.014   |
| Yes                      | 5.9 (234)   | 54.6 (48.2 to 60.9)            |         | 1.3 (1.1 to 1.5)                                | 33.5 (27.7 to 39.8)       |         | 20.8 (16.1 to 26.5) |         |
| No                       | 94.0 (3767) | 57.3 (0.55 to 0.58)            |         | 1.1 (1.1 to 1.2)                                | 28.8 (27.3 to 30.2)       |         | 14.9 (13.8 to 16.0) |         |
| Medical attention        |             |                                | <0.001  |                                                 |                           | 0.048   |                     | 0.531   |

| Variable  | % (n)       | Any chronic disease % (95% CI) | P value | Mean number of chronic health problems (95% CI) | Multimorbidity % (95% CI) |         |                     |         |
|-----------|-------------|--------------------------------|---------|-------------------------------------------------|---------------------------|---------|---------------------|---------|
|           |             |                                |         |                                                 | ≥2                        | P value | ≥3                  | P value |
| Primary   | 30.2 (1208) | 60.8 (58.0 to 63.5)            |         | 1.2 (1.1 to 1.3)                                | 29.9 (27.3 to 32.5)       |         | 15.2 (13.3 to 17.3) |         |
| Secondary | 14.9 (598)  | 62.3 (58.3 to 66.1)            |         | 1.3 (1.2 to 1.5)                                | 33.0 (29.4 to 36.9)       |         | 18.9 (15.9 to 22.2) |         |
| Tertiary  | 47.2 (1886) | 54.0 (51.8 to 56.3)            |         | 1.1 (1.0 to 1.2)                                | 27.7 (25.7 to 29.8)       |         | 14.3 (12.8 to 15.9) |         |
| Others    | 7.7 (309)   | 52.7 (47.2 to 58.3)            |         | 1.0 (0.9 to 1.2)                                | 26.2 (21.6 to 31.4)       |         | 14.2 (10.7 to 18.5) |         |

\* Descriptive statistics using simple frequency and Pearson  $\chi^2$  test

CI: confidence interval; physician visit, hospitalization, dengue and malaria in last 12 months; § tertiary education or higher; † Average household income in 2015: A-B, US\$6500-US\$1419; C, US\$463-US\$772; D-E, US\$205; ‡ People who use the public health service.

Table 2. Prevalence (%) of most common diseases stratified by sex, age and multimorbidity group, Manaus metropolitan region, Brazil, 2015\*

| Morbidities                         | % (n)      | Multimorbidity $\geq 2$ |                   |                    | Multimorbidity $\geq 3$ |                   |                    |
|-------------------------------------|------------|-------------------------|-------------------|--------------------|-------------------------|-------------------|--------------------|
|                                     |            | 18 to 34<br>% (n)       | 35 to 59<br>% (n) | $\geq 60$<br>% (n) | 18 to 34<br>% (n)       | 35 to 59<br>% (n) | $\geq 60$<br>% (n) |
| <b>Women (2113)</b>                 |            | 18.4 (195)              | 47.0 (394)        | 76.9 (168)         | 7.0 (78)                | 28.1 (236)        | 55.0 (120)         |
| Chronic spinal problem <sup>†</sup> | 35.3 (747) | 42.6 (135)              | 75.6 (248)        | 96.1 (99)          | 20.1 (64)               | 53.6 (176)        | 75.7 (78)          |
| Hypertension                        | 24.4 (516) | 62.3 (78)               | 83.0 (211)        | 92.0 (126)         | 32.7 (94)               | 58.7 (149)        | 71.6 (98)          |
| Arthritis or rheumatism             | 19.5 (414) | 79.5 (66)               | 91.6 (197)        | 94.8 (110)         | 39.7 (33)               | 67.7 (146)        | 79.3 (92)          |
| Hypercholesterolemia                | 20.1 (425) | 79.5 (66)               | 90.8 (217)        | 97.0 (100)         | 55.4 (46)               | 62.4 (149)        | 82.5 (85)          |
| Diabetes                            | 7.4 (157)  | 93.7 (15)               | 90.2 (82)         | 96.0 (48)          | 87.4 (14)               | 76.6 (70)         | 84.5 (42)          |
| Asthma or asthmatic bronchitis      | 7.3 (155)  | 68.5 (50)               | 85.6 (54)         | 100.0 (19)         | 38.3 (28)               | 73.0 (46)         | 100.0 (19)         |
| Depressive disorder                 | 7.4 (158)  | 71.0 (44)               | 91.9 (69)         | 100.0 (21)         | 30.6 (19)               | 73.2 (55)         | 95.2 (20)          |
| Heart disease <sup>‡</sup>          | 5.6 (119)  | 71.8 (23)               | 98.1 (52)         | 100.0 (34)         | 53.0 (17)               | 86.7 (46)         | 94.0 (32)          |
| <b>Men (1888)</b>                   |            | 10.9 (102)              | 28.2 (220)        | 47.1 (84)          | 3.4 (32)                | 11.4 (89)         | 31.4 (56)          |
| Chronic spinal problem <sup>†</sup> | 35.0 (662) | 27.5 (77)               | 49.7 (149)        | 65.8 (54)          | 7.1 (20)                | 21.0 (63)         | 51.4 (42)          |
| Hypertension                        | 14.4 (271) | 77.1 (37)               | 76.7 (112)        | 79.5 (61)          | 35.3 (17)               | 41.1 (60)         | 58.6 (45)          |
| Arthritis or rheumatism             | 9.5 (179)  | 89.3 (25)               | 86.8 (80)         | 84.9 (50)          | 46.1 (13)               | 48.9 (45)         | 64.5 (38)          |
| Hypercholesterolemia                | 9.0 (171)  | 57.1 (24)               | 87.6 (85)         | 87.6 (28)          | 33.3 (14)               | 49.4 (48)         | 78.2 (25)          |

P values of all variables were  $\leq 0.002$

\* multimorbidity with prevalence  $\geq 5\%$ .

<sup>†</sup> chronic back pain or neck, low back pain, sciatica, vertebral or disc pain

<sup>‡</sup> heart disease, or heart attack, angina, cardiac insufficiency

Table 3 shows the investigation for factors associated with multimorbidity. After adjustment, multimorbidity ( $\geq 2$  diseases) was associated with female sex (PR = 1.66, 95% CI 1.50 to 1.83), age between 45 and 59 years (PR = 4.36, 95% CI 3.48 to 5.46) and age  $\geq 60$  years (PR = 5.68, 95% CI 4.51 to 7.15). The presence of  $\geq 3$  diseases was associated with female sex (PR = 2.19, 95% CI 1.88 to 2.56), age 45 to 59 years (PR = 7.62, 95% CI 5.22 to 11.10), age  $\geq 60$  years (PR = 12.03, 95% CI 8.20 to 17.66), dengue in the last 12 months (PR = 1.36, 95% CI 1.13 to 1.64), and very poor health status (PR = 7.89, 95% CI 4.71 to 13.23). Having  $\geq 3$  chronic conditions increased the demand for physician visits, hospitalization in the last year, and demand for the same health service. Education, income, occupation, and malaria in the last 12 months did not show associations with multimorbidity.

Table 3. Adjusted prevalence ratio (PRs) and 95% CIs for any chronic disease and multimorbidity  $\geq 2$  and  $\geq 3$ , according to sociodemographic and health variables based on hierarchical Poisson regression. Manaus metropolitan region, Brazil, 2015 (n=4001)

| Variable                      | Any chronic disease<br>PR (95% CI) | P value | Multimorbidity PR (95% CI) |         |                       |         |
|-------------------------------|------------------------------------|---------|----------------------------|---------|-----------------------|---------|
|                               |                                    |         | $\geq 2$                   | P value | $\geq 3$              | P value |
| <b>Demographic block†</b>     |                                    |         |                            |         |                       |         |
| Sex                           |                                    |         |                            |         |                       |         |
| Male                          | 1.00                               |         | 1.00                       |         | 1.00                  |         |
| Female                        | 1.19 (1.12 to 1.25)                | <0.001  | 1.66 (1.50 to 1.83)        | <0.001  | 2.19 (1.88 to 2.56)   | <0.001  |
| Age group                     |                                    |         |                            |         |                       |         |
| 18 to 24                      | 1.00                               |         |                            |         | 1.00                  |         |
| 25 to 34                      | 1.33 (1.19 to 1.48)                | <0.001  | 1.81 (1.42 to 2.30)        | <0.001  | 1.88 (1.24 to 2.84)   | 0.003   |
| 35 to 44                      | 1.63 (1.47 to 1.81)                | <0.001  | 2.85 (2.26 to 3.60)        | <0.001  | 3.40 (2.28 to 5.06)   | <0.001  |
| 45 to 59                      | 1.91 (1.72 to 2.12)                | <0.001  | 4.36 (3.48 to 5.46)        | <0.001  | 7.62 (5.22 to 11.10)  | <0.001  |
| $\geq 60$                     | 2.32 (2.08 to 2.57)                | <0.001  | 5.68 (4.51 to 7.15)        | <0.001  | 12.03 (8.20 to 17.66) | <0.001  |
| Marital status                |                                    |         |                            |         |                       |         |
| Single                        | 1.00                               |         | 1.00                       |         | 1.00                  |         |
| Married                       | 1.09 (0.96 to 1.07)                | 0.521   | 1.20 (1.07 to 1.33)        | 0.001   | 1.21 (1.03 to 1.42)   | 0.017   |
| Separated/<br>Divorced        | 1.00 (0.91 to 1.10)                | 0.961   | 1.24 (1.06 to 1.45)        | 0.006   | 0.93 (0.72 to 1.21)   | 0.620   |
| Widower                       | 0.96 (0.87 to 1.06)                | 0.475   | 1.18 (1.01 to 1.38)        | 0.032   | 0.99 (0.77 to 1.26)   | 0.962   |
| Skin colour                   |                                    |         |                            |         |                       |         |
| White/yellow                  | 1.00                               |         | 1.00                       |         | 1.00                  |         |
| Black/brown/<br>Indigenous    | 1.10 (1.02 to 1.18)                | 0.006   | 1.04 (0.93 to 1.16)        | 0.474   | 0.89 (0.75 to 1.05)   | 0.175   |
| <b>Socioeconomic block ‡</b>  |                                    |         |                            |         |                       |         |
| Education                     |                                    |         |                            |         |                       |         |
| High<br>education<br>or above | 1.00                               |         | 1.00                       |         | 1.00                  |         |
| High school                   | 1.00 (0.87 to 1.14)                | 0.976   | 0.89 (0.71 to 1.12)        | 0.357   | 0.73 (0.50 to 1.05)   | 0.091   |
| Middle school                 | 0.98 (0.84 to 1.13)                | 0.754   | 0.81 (0.63 to 1.06)        | 0.135   | 0.80 (0.53 to 1.20)   | 0.289   |
| Elementary<br>school or less  | 1.12 (0.98 to 1.29)                | 0.106   | 1.01 (0.80 to 1.28)        | 0.877   | 1.08 (0.75 to 1.55)   | 0.667   |
| Economic<br>classification    |                                    |         |                            |         |                       |         |
| A – B                         | 1.00                               |         | 1.00                       |         | 1.00                  |         |
| C                             | 1.04 (0.96 to 1.13)                | 0.361   | 1.01 (0.87 to 1.17)        | 0.881   | 1.05 (0.83 to 1.33)   | 0.656   |
| D – E                         | 1.06 (0.97 to 1.16)                | 0.207   | 1.15 (0.98 to 1.36)        | 0.075   | 1.15 (0.89 to 1.49)   | 0.254   |
| Occupation                    |                                    |         |                            |         |                       |         |
| Formal job                    | 1.00                               |         | 1.00                       |         | 1.00                  |         |
| Informal job                  | 0.95 (0.87 to 1.03)                | 0.223   | 0.97 (0.83 to 1.13)        | 0.728   | 0.98 (0.76 to 1.28)   | 0.929   |
| Retired                       | 0.95 (0.86 to 1.06)                | 0.363   | 1.11 (0.92 to 1.32)        | 0.258   | 1.39 (1.02 to 1.88)   | 0.033   |
| Student/<br>housewife         | 0.96 (0.87 to 1.05)                | 0.331   | 0.97 (0.83 to 1.14)        | 0.767   | 1.05 (0.81 to 1.36)   | 0.671   |
| Unemployed                    | 1.09 (0.99 to 1.20)                | 0.081   | 0.99 (0.81 to 1.20)        | 0.949   | 1.13 (0.83 to 1.54)   | 0.404   |
| <b>Health block §</b>         |                                    |         |                            |         |                       |         |

|    |                  |                     |        |                     |        |                      |        |  |
|----|------------------|---------------------|--------|---------------------|--------|----------------------|--------|--|
| 1  |                  |                     |        |                     |        |                      |        |  |
| 2  |                  |                     |        |                     |        |                      |        |  |
| 3  | Private health   |                     |        |                     |        |                      |        |  |
| 4  | insurance        |                     |        |                     |        |                      |        |  |
| 5  | No               | 1.00                |        | 1.00                |        | 1.00                 |        |  |
| 6  | Yes              | 0.99 (0.91 to 1.07) | 0.913  | 1.03 (0.90 to 1.18) | 0.593  | 1.04 (0.84 to 1.28)  | 0.771  |  |
| 7  | Health status    |                     |        |                     |        |                      |        |  |
| 8  | Very good        | 1.00                |        | 1.00                |        | 1.00                 |        |  |
| 9  | Good             | 1.43 (1.24 to 1.64) | <0.001 | 1.63 (1.23 to 2.15) | <0.001 | 1.81 (1.09 to 2.99)  | 0.020  |  |
| 10 | Fair             | 1.94 (1.69 to 2.23) | <0.001 | 2.84 (2.15 to 3.76) | <0.001 | 4.21 (2.56 to 6.93)  | <0.001 |  |
| 11 | Bad              | 2.01 (1.80 to 2.41) | <0.001 | 3.53 (2.64 to 4.71) | <0.001 | 6.25 (3.74 to 10.47) | <0.001 |  |
| 12 | Very bad         | 1.91 (1.60 to 2.27) | <0.001 | 3.70 (2.73 to 5.00) | <0.001 | 7.89 (4.71 to 13.23) | <0.001 |  |
| 13 | Health reference |                     |        |                     |        |                      |        |  |
| 14 | No               | 1.00                |        | 1.00                |        | 1.00                 |        |  |
| 15 | Yes              | 1.12 (1.06 to 1.19) | <0.001 | 1.33 (1.19 to 1.47) | <0.001 | 1.40 (1.20 to 1.63)  | <0.001 |  |
| 16 | Physician visit  |                     |        |                     |        |                      |        |  |
| 17 | No               | 1.00                |        | 1.00                |        | 1.00                 |        |  |
| 18 | Yes              | 1.13 (1.05 to 1.22) | <0.001 | 1.22 (1.07 to 1.40) | 0.002  | 1.33 (1.09 to 1.64)  | 0.005  |  |
| 19 | Hospitalization  |                     |        |                     |        |                      |        |  |
| 20 | No               | 1.00                |        | 1.00                |        | 1.00                 |        |  |
| 21 | Yes              | 1.18 (1.09 to 1.27) | <0.001 | 1.36 (1.20 to 1.54) | <0.001 | 1.43 (1.17 to 1.74)  | <0.001 |  |
| 22 | Dengue           |                     |        |                     |        |                      |        |  |
| 23 | No               | 1.00                |        | 1.00                |        | 1.00                 |        |  |
| 24 | Yes              | 1.07 (0.99 to 1.16) | 0.079  | 1.23 (1.08 to 1.41) | 0.001  | 1.36 (1.13 to 1.64)  | 0.001  |  |
| 25 | Malaria          |                     |        |                     |        |                      |        |  |
| 26 | No               | 1.00                |        | 1.00                |        | 1.00                 |        |  |
| 27 | Yes              | 0.98 (0.82 to 1.01) | 0.109  | 0.96 (0.81 to 1.13) | 0.653  | 0.99 (0.78 to 1.26)  | 0.947  |  |
| 28 | Type of service  |                     |        |                     |        |                      |        |  |
| 29 | Primary          | 1.00                |        | 1.00                |        | 1.00                 |        |  |
| 30 | Secondary        | 1.02 (0.95 to 1.09) | 0.518  | 1.07 (0.95 to 1.22) | 0.265  | 1.15 (0.95 to 1.40)  | 0.129  |  |
| 31 | Tertiary         | 0.95 (0.89 to 1.00) | 0.086  | 1.01 (0.92 to 1.12) | 0.780  | 1.05 (0.90 to 1.25)  | 0.489  |  |
| 32 | Outros           | 0.92 (0.82 to 1.03) | 0.180  | 0.97 (0.80 to 1.17) | 0.723  | 1.13 (0.85 to 1.51)  | 0.374  |  |

Significant variables kept in each block of analysis:

**Any chronic disease:** †sex, age, marital status and race; ‡sex, age, marital status, education, income, occupation; §sex, age, marital status, income, occupation, private health insurance, health status, health reference, medical consultation in last 12 months, hospital admission in last 12 months, dengue, malaria and type of health service that usually comes

**≥2 morbidities:** †sex, age, marital status and race; ‡sex, age, marital status, education, income, occupation; §sex, age, marital status, income, occupation, private health insurance, health status, health reference, medical consultation in last 12 months, hospital admission in last 12 months, dengue, malaria and type of health service that usually comes

**≥3 morbidities:** †sex, age, marital status and race; ‡sex, age, marital status, education, income, occupation; §sex, age, marital status, income, occupation, private health insurance, health status, health reference, medical consultation in last 12 months, hospital admission in last 12 months, dengue, malaria and type of health service that usually comes

The factor analysis is presented in Table 4. The KMO coefficient was 0.82 for women and 0.78 for men, and the Bartlett sphericity test presented a p-value  $\leq 0.001$  for both, suggesting an adequate factor analysis. In women, one multimorbidity pattern (supplemental figure 1) explained 81% of the total variance, including the 12 chronic

diseases analysed. In men, two factors were identified (supplemental figure 2). In the first factor, heart diseases, chronic kidney disease, stroke, arthritis or rheumatism, chronic spinal problems, depressive disorders, asthma or bronchitis and lung diseases were the associated chronic diseases, which explained a total of 62% of the variance. In the second, the associated chronic diseases were hypercholesterolemia, hypertension, heart disease, diabetes and arthritis, which explained 56% of the variance.

Table 4. Factor score of each chronic disease in women and men, Manaus metropolitan region, Brazil, 2015

| Morbidity                      | Women<br>(n=2113) |          | Men<br>(n=1888) |          |
|--------------------------------|-------------------|----------|-----------------|----------|
|                                | Factor 1          | Factor 1 | Factor 1        | Factor 2 |
| Hypercholesterolemia           | 0.70              |          |                 | 0.62     |
| Hypertension                   | 0.64              |          |                 | 0.78     |
| Heart disease                  | 0.72              | 0.40     |                 | 0.47     |
| Diabetes                       | 0.63              |          |                 | 0.85     |
| Chronic kidney disease         | 0.46              | 0.73     |                 |          |
| Stroke                         | 0.66              | 0.61     |                 |          |
| Arthritis                      | 0.65              | 0.40     |                 | 0.35     |
| Chronic spinal problem         | 0.46              | 0.44     |                 |          |
| Depressive disorder            | 0.49              | 0.58     |                 |          |
| Asthma or asthmatic bronchitis | 0.44              | 0.48     |                 |          |
| Lung diseases†                 | 0.53              | 0.76     |                 |          |
| Cancer‡                        | 0.52              |          |                 |          |
| Proportion of variance (%)     | 81.0              | 62.0     |                 | 56.0     |
| Kaiser-Meyer-Olkin             | 0.82              | 0.78     |                 |          |

Note: Kept factors were those with scores  $\geq 0.30$  after oblique rotation;

† pulmonary emphysema, bronchitis, chronic obstructive lung disease

‡ cancer showed negative values in men and was excluded

## DISCUSSION

More than half of the adults had some chronic disease. The occurrence of two or more morbidities was reported by more than a quarter of the adults. Four out of twenty-five individuals reported a multimorbidity of three or more. Female sex, elderly age, dengue in the last year, poor health status, usage of a reference health, physician visits and hospitalization presented associations with multimorbidity. Chronic spinal problems were the most commonly reported diseases.

We used a list of 12 self-reported chronic conditions – of which some were very broad – to assess the primary outcome of this study. A systematic review summarized 39



1  
2  
3 observational studies from 1993 to 2013 identified a range of five to 335 diseases for the  
4 study of multimorbidity.<sup>3</sup> In previous studies, the lower the number of diseases included in  
5 the research, the lower the prevalence observed.<sup>5 31</sup> Regardless of the number of chronic  
6 conditions reported and how they were defined, multimorbidity estimates are influenced by  
7 self-report. Although widely applied,<sup>3 5 32</sup> such assessments are more likely to suffer  
8 classification bias or have no validated instrument for confirmation. In present research  
9 over-reporting or underreporting may have occurred,<sup>33</sup> as well as recall bias, which is more  
10 common in elderly individuals of lower socioeconomic and educational levels.<sup>7 34</sup> In  
11 addition, we did not investigate disease severity. Previous studies recommend inquiring  
12 about the degree of disease intensity, the diseases' interference with routine activities and  
13 disabilities.<sup>5 32</sup> More reliable estimates of multimorbidity, using medical records, for  
14 example, are not available in the region.

15  
16 The response rate was 76%, which may constitute a source of selection bias. Efforts  
17 were employed to improve representativeness by using predefined sex and age quotas and  
18 interviewing one individual per family, according to official estimates.<sup>35</sup> Survival bias may  
19 also influenced the results, since patients who died prematurely from those causes, were  
20 hospitalized or had more serious diseases were not available in the household to participate  
21 in the survey. The cross-sectional nature of the study does not allow temporal associations  
22 investigation.

23  
24 This is the first local study to estimate the prevalence of multimorbidity in adults in  
25 the state of Amazonas. We used a cut-off point of  $\geq 2$  and  $\geq 3$  chronic diseases, as previous  
26 studies did.<sup>3 5</sup> We identified the most vulnerable multimorbidity groups were women and  
27 the elderly. The multimorbidity was higher in older people and it increases with age, this  
28 outcome was observed in previous studies.<sup>5 9 20</sup> The National Health Survey conducted in  
29 Brazil in 2013 reported that women are most affected in all socioeconomic groups,  
30 especially the elderly.<sup>36</sup>

31  
32 Our results showed similarities to a cross-sectional study conducted in 2012 in  
33 Pelotas city in the southern region of Brazil with 2927 subjects, in which 29.1% of the  
34 interviewees had more than two chronic diseases and 14% had three or more.<sup>37</sup> The 2013  
35 National Health Survey also confirmed these findings: 22% of Brazilians reported two or  
36 more chronic diseases, and 10% were affected by more than three.<sup>14</sup> The highest prevalence  
37  
38  
39  
40  
41  
42  
43  
44  
45  
46  
47  
48  
49  
50  
51  
52  
53  
54  
55  
56  
57  
58  
59  
60

1  
2  
3 was observed in the south (26 to 29%),<sup>14</sup> which is more economically developed and have  
4 greater access to health services.<sup>17 38</sup> Any chronic disease occurred in 45% of Brazilians,  
5 with a lower prevalence in the north region.<sup>39</sup>  
6  
7

8 In other contexts, lower prevalence of multimorbidity was found. A survey  
9 conducted in 2012 in Italy, with 3 759 836 adults, detected that 15% of individuals  
10 presented two or more chronic diseases.<sup>10</sup> In Ireland, a representative sample of the  
11 population (11.3% of subjects  $\geq 50$  years) presented multiple diseases.<sup>12</sup> Furthermore, an  
12 electronic medical data analysis, conducted in 2007 with 1 751 841 users of the Scottish  
13 Health Service, found that 23% had multimorbidity.<sup>9</sup> In a comparable economic context to  
14 Brazil's, a population-based Indian study conducted in 2007 with 10 973 interviewees  
15 identified smaller proportions (28% had any chronic disease and approximately 9% had  
16 multimorbidity).<sup>40</sup>  
17  
18  
19  
20  
21  
22  
23

24 Two findings of our research are rarely described in previous studies: the higher  
25 frequency of multimorbidity in younger ages and the lack of association with economic  
26 status. One-half of adults aged 25 to 34 years and almost two-thirds of interviewees aged 35  
27 to 44 years reported any chronic condition, and almost one-third had multimorbidity. The  
28 development of multimorbidity in young adults is agreement with previous data from  
29 Brazil.<sup>20 36 37</sup> It is important to emphasize that half of the Manaus metropolitan region is  
30 concentrated in this age range (49% aged 25 to 44 years). A systematic review of 24 cross-  
31 sectional studies on multimorbidity found income as a conflicting factor across studies,  
32 associated either with richer or poorer individuals, while lower educational attainment was  
33 associated with a 64% higher chance of multimorbidity.<sup>41</sup> We identified lack of association  
34 after adjusting for socioeconomic block.  
35  
36  
37  
38  
39  
40  
41  
42

43 In lower-income countries, such as Brazil, which also faces economic austerity  
44 policies, rising unemployment and unstable social and health policies,<sup>42</sup> it is possible to  
45 predict a reduction in access to health services, with a consequent increase in morbidity.  
46 This effect was observed in other austerity scenarios, in which this type of policy reduced  
47 jobs, education and use of health services, resulting in an increase of chronic diseases.<sup>43 44</sup>  
48 High-income countries has found that 3,6 more years of education reduces the risk of  
49 cardiovascular disease by one third.<sup>45</sup>  
50  
51  
52  
53  
54  
55  
56  
57  
58  
59  
60

1  
2  
3 Back pain was the most frequent disease, reported by one-third of the sample. In our  
4 study this morbidity was assessed using several questions, which may have increased the  
5 sensitivity of the assessment. An even higher proportion (49%) of vertebral spine/back  
6 issues was observed in a representative cross-sectional survey of Brazilian adults.<sup>36</sup> In other  
7 contexts, similar prevalence values were estimated.<sup>46</sup>

8  
9  
10  
11 The presence of dengue was higher in individuals with multimorbidity, possibly due  
12 to the lower immunologic response observed in chronic diseases such as diabetes,  
13 rheumatoid arthritis, and asthma.<sup>47 48</sup> A systematic review of 16 cohort and case-control  
14 studies from 2007 to 2013 showed chronic diseases as risk factors for severe dengue.<sup>49</sup> In  
15 another meta-analysis of 10 studies conducted between 2006 and 2014,<sup>50</sup> diabetes was  
16 significantly associated with haemorrhagic dengue: regardless of demographic and  
17 socioeconomic characteristics, the association was 5% higher compared to individuals who  
18 did not have diabetes-

19  
20 A single multimorbidity pattern was identified in women, which included the 12  
21 researched diseases. The factor loading the most strength of association in women was  
22 heart disease. In previous studies conducted in Brazil with similar questions, up to three  
23 multimorbidity pattern have been identified, and hypertension had the most strength of  
24 association, but no stratification by sex was done.<sup>20</sup> It is possible that the lowest number of  
25 pattern for women in our research may be due to stratification or to the broad categories of  
26 diseases. In men, lung disease was disease with higher factorial loading, comparable to a  
27 Spanish population-based cross-sectional study.<sup>51</sup> Based on assumptions, elderly men could  
28 be clustered in factor 1, since they had worse outcomes. Factor 2 would include younger  
29 men with diseases developed from risk factors such as sedentary lifestyle and obesity.

30  
31 According to the results, it is estimated that over 1 300 000 residents of the  
32 metropolitan region of Manaus have a chronic condition, and almost 700 000 have  
33 multimorbidity. Early diagnosing and treatment of chronic diseases, centred in primary care  
34 services, is a priority to allow sustainability of the health system and a healthier society.<sup>52</sup>

## 35 36 37 38 39 40 41 42 43 44 45 46 47 48 49 **CONCLUSION**

50  
51 Multimorbidity was common in residents of the metropolitan region of Manaus and  
52 was associated with female sex, elderly people and poorer health perception. Prevention  
53  
54  
55  
56  
57  
58  
59

and control strategies should prioritize these groups. Future analyses should investigate the relationship between multimorbidity and use and costs of health services in the region.

**Contributors** MTS, TFG, and MEAA designed the study. MEAA, MTS and BNP performed the statistical analyses. MEAA, MTS, TFG, BNP and MGP interpreted the results and drafted the manuscript. All authors made critical revisions and provided intellectual content to the manuscript, approved the final version and agree to be accountable for all aspects of this work.

**Funding** This work was funded by the National Council for Scientific and Technological Development (Conselho Nacional para o Desenvolvimento Cientifico e Tecnologico - CNPq), [404990/2013-4 and 448093/2014-6, to MTS] and the Foundation for Research Support of the State of Amazonas (Fundação de Amparo à Pesquisa do Estado do Amazonas - FAPEAM), [to MEAA].

**Competing interest** None declared

**Patient consent** Obtained

**Ethics approval** The research project was approved by the Research Ethics Committee of the Federal University of Amazonas. All the individuals who agreed to participate signed a free and informed consent form.

**Data sharing statement:** Data are available and can be accessed by contacting MTS.

## REFERENCES

1. van den Akker M, Buntinx F, Knottnerus JA. Comorbidity or multimorbidity: what's in a name? A review of literature. *The European Journal of General Practice* 1996;2(2):65-70.
2. Le Reste JY, Nabbe P, Manceau B, et al. The European General Practice Research Network presents a comprehensive definition of multimorbidity in family medicine and long term care, following a systematic review of relevant literature. *Journal of the American Medical Directors Association* 2013;14(5):319-25.
3. Violan C, Foguet-Boreu Q, Flores-Mateo G, et al. Prevalence, determinants and patterns of multimorbidity in primary care: a systematic review of observational studies. *PloS One* 2014;9(7):e102149.
4. Diederichs C, Berger K, Bartels DB. The measurement of multiple chronic diseases—a systematic review on existing multimorbidity indices. *The Journals of Gerontology Series A: Biological Sciences and Medical Sciences* 2011;66(3):301-11.

- 1
  - 2
  - 3
  - 4
  - 5
  - 6
  - 7
  - 8
  - 9
  - 10
  - 11
  - 12
  - 13
  - 14
  - 15
  - 16
  - 17
  - 18
  - 19
  - 20
  - 21
  - 22
  - 23
  - 24
  - 25
  - 26
  - 27
  - 28
  - 29
  - 30
  - 31
  - 32
  - 33
  - 34
  - 35
  - 36
  - 37
  - 38
  - 39
  - 40
  - 41
  - 42
  - 43
  - 44
  - 45
  - 46
  - 47
  - 48
  - 49
  - 50
  - 51
  - 52
  - 53
  - 54
  - 55
  - 56
  - 57
  - 58
  - 59
  - 60
5. Fortin M, Stewart M, Poitras M-E, et al. A systematic review of prevalence studies on multimorbidity: toward a more uniform methodology. *The Annals of Family Medicine* 2012;10(2):142-51.
6. Feigin V. Global, regional, and national life expectancy, all-cause mortality, and cause-specific mortality for 249 causes of death, 1980-2015: a systematic analysis for the Global Burden of Disease Study 2015. *The Lancet* 2016;388(10053):1459-544.
7. Hussain MA, Huxley RR, Al Mamun A. Multimorbidity prevalence and pattern in Indonesian adults: an exploratory study using national survey data. *BMJ Open* 2015;5(12):e009810.
8. Ryan A, Wallace E, O'Hara P, et al. Multimorbidity and functional decline in community-dwelling adults: a systematic review. *Health and Quality of Life Outcomes* 2015;13(1):168.
9. Barnett K, Mercer SW, Norbury M, et al. Epidemiology of multimorbidity and implications for health care, research, and medical education: a cross-sectional study. *The Lancet* 2012;380(9836):37-43.
10. Lenzi J, Avaldi VM, Rucci P, et al. Burden of multimorbidity in relation to age, gender and immigrant status: a cross-sectional study based on administrative data. *BMJ Open* 2016;6(12):e012812.
11. Lima-Costa MF, De Oliveira C, Macinko J, et al. Socioeconomic inequalities in health in older adults in Brazil and England. *American Journal of Public Health* 2012;102(8):1535-41.
12. Glynn LG, Valderas JM, Healy P, et al. The prevalence of multimorbidity in primary care and its effect on health care utilization and cost. *Family Practice* 2011;28(5):516-23.
13. Nagl A, Witte J, Hodek JM, et al. Relationship between multimorbidity and direct healthcare costs in an advanced elderly population. Results of the PRISCUS trial. *Zeitschrift für Gerontologie und Geriatrie* 2012;45(2):146-54. doi: 10.1007/s00391-011-0266-2 [published Online First: 2012/02/22]
14. Nunes BP, Chiavegatto Filho AD, Pati S, et al. Contextual and individual inequalities of multimorbidity in Brazilian adults: a cross-sectional national-based study. *BMJ Open* 2017;7(6):e015885.
15. de Souza Santos Machado V, Valadares AL, da Costa-Paiva LS, et al. Multimorbidity and associated factors in Brazilian women aged 40 to 65 years: a population-based study. *Menopause* 2012;19(5):569-75. doi: 10.1097/gme.0b013e3182455963 [published Online First: 2012/03/15]
16. Nunes BP, Thume E, Facchini LA. Multimorbidity in older adults: magnitude and challenges for the Brazilian health system. *BMC public health* 2015;15:1172. doi: 10.1186/s12889-015-2505-8 [published Online First: 2015/11/26]
17. Pinto DGC, Costa MAC, Marques MLdAC. Índice de desenvolvimento humano municipal brasileiro. Brasília: Programa das Nações Unidas para o Desenvolvimento, Instituto de Pesquisa Econômica Aplicada; 2013 [Available from: <http://repositorio.ipea.gov.br/handle/11058/2375> Acesso março de 2017.
18. Silva MT, Galvao TF. Use of health services among adults living in Manaus Metropolitan Region, Brazil: population-based survey, 2015. *Epidemiol Serv Saúde* 2017;26(4):725-34.
19. Kneipp SM, Yarandi HN. Complex sampling designs and statistical issues in secondary analysis. *Western Journal of Nursing Research* 2002;24(5):552-66.

20. Rzewuska M, de Azevedo-Marques JM, Coxon D, et al. Epidemiology of multimorbidity within the Brazilian adult general population: Evidence from the 2013 National Health Survey (PNS 2013). *PloS One* 2017;12(2):e0171813.
21. Macinko J, Mullachery P, Silver D, et al. Patterns of alcohol consumption and related behaviors in Brazil: Evidence from the 2013 National Health Survey (PNS 2013). *PloS One* 2015;10(7):e0134153.
22. ABEP. Associação Brasileira de Empresas de Pesquisa. Critério de Classificação Econômica Brasil; 2015 [Available from: <http://www.abep.org/criterio-brasil> accessed 10/08/2017 2017.
23. Barros AJ, Hirakata VN. Alternatives for logistic regression in cross-sectional studies: an empirical comparison of models that directly estimate the prevalence ratio. *BMC Medical Research Methodology* 2003;3(1):1.
24. Espelt A, Mari-Dell'Olmo M, Penelo E, et al. Applied prevalence ratio estimation with different regression models: an example from a cross-national study on substance use research. *Adicciones* 2016;823
25. Victora CG, Huttly SR, Fuchs SC, et al. The role of conceptual frameworks in epidemiological analysis: a hierarchical approach. *Int J Epidemiol* 1997;26(1):224-27.
26. Fotouhi AR. Modelling overdispersion in longitudinal count data in clinical trials with application to epileptic data. *Contemporary Clinical Trials* 2008;29(4):547-54.
27. Norman G, Streiner D. Principal Components and factor analysis. fooling around with factors. biostatistics: the bare essentials: Hamilton: BMJ Publishing Group, 2008.
28. Kim JO, Mueller CW. Factor Analysis: Statistical Methods and Practical Issues: Sage 1978.
29. Kubinger KD. On artificial results due to using factor analysis for dichotomous variables. *Psychology Science* 2003;45(1):106-10.
30. Schäfer I, von Leitner E-C, Schön G, et al. Multimorbidity patterns in the elderly: a new approach of disease clustering identifies complex interrelations between chronic conditions. *PloS One* 2010;5(12):e15941.
31. Pati S, Swain S, Hussain MA, et al. Prevalence and outcomes of multimorbidity in South Asia: a systematic review. *BMJ Open* 2015;5(10):e007235.
32. Vancampfort D, Koyanagi A, Ward PB, et al. Chronic physical conditions, multimorbidity and physical activity across 46 low-and middle-income countries. *International Journal of Behavioral Nutrition and Physical Activity* 2017;14(1):6.
33. Gross R, Bentur N, Elhayany A, et al. The validity of self-reports on chronic disease: characteristics of underreporters and implications for the planning of services. *Public health reviews* 1996;24(2):167-82.
34. Palladino R, Tayu Lee J, Ashworth M, et al. Associations between multimorbidity, healthcare utilisation and health status: evidence from 16 European countries. *Age Ageing* 2016;45(3):431-5.
35. Brasil. Instituto Brasileiro de Geografia e Estatística (IBGE). Censo demográfico de 2010. Amazonas [Available from: <http://www.censo2010.ibge.gov.br/sinopse/index.php?uf=13&dados=4>. accessed 20/01/2016.
36. de Carvalho JN, Roncalli ÂG, de Camargo Cancela M, et al. Prevalence of multimorbidity in the Brazilian adult population according to socioeconomic and demographic characteristics. *PloS One* 2017;12(4):e0174322.

- 1
- 2
- 3 37. Nunes BP, Camargo-Figuera FA, Guttier M, et al. Multimorbidity in adults from a
- 4 southern Brazilian city: occurrence and patterns. *International Journal of Public*
- 5 *Health* 2016;61(9):1013-20.
- 6
- 7 38. Araújo MEA, Silva MT, Andrade KRC, et al. Prevalence of health services utilization
- 8 in Brazil: a systematic review and meta-analysis. *Epidemiol Serv Saude*
- 9 2017;26(3):587-602. doi: 10.5123/S1679-49742017000300016
- 10
- 11 39. Malta DC, Bernal RTI, de Souza MdFM, et al. Social inequalities in the prevalence of
- 12 self-reported chronic non-communicable diseases in Brazil: national health survey
- 13 2013. *International Journal for Equity in Health* 2016;15(1):153.
- 14
- 15 40. Pati S, Agrawal S, Swain S, et al. Non communicable disease multimorbidity and
- 16 associated health care utilization and expenditures in India: cross-sectional study.
- 17 *BMC Health Services Research* 2014;14(1):451.
- 18
- 19 41. Pathirana TI, Jackson CA. Socioeconomic status and multimorbidity: a systematic
- 20 review and meta-analysis. *Australian and New Zealand Journal of Public Health*
- 21 2018
- 22
- 23 42. Machado CV, Lima LDd, Baptista TWdF. Health policies in Brazil in times of
- 24 contradiction: paths and pitfalls in the construction of a universal system. *Cadernos*
- 25 *de saude publica* 2017;33
- 26
- 27 43. Stuckler D, Reeves A, Loopstra R, et al. Austerity and health: the impact in the UK and
- 28 Europe. *European Journal of Public Health* 2017;27(suppl\_4):18-21.
- 29
- 30 44. Kyriopoulos I-I, Zavras D, Skroumpelos A, et al. Barriers in access to healthcare
- 31 services for chronic patients in times of austerity: an empirical approach in Greece.
- 32 *International Journal for Equity in Health* 2014;13(1):54.
- 33
- 34 45. Tillmann T, Vaucher J, Okbay A, et al. Education and coronary heart disease:
- 35 mendelian randomisation study. *BMJ (Clinical research ed)* 2017;358:j3542. doi:
- 36 10.1136/bmj.j3542 [published Online First: 2017/09/01]
- 37
- 38 46. Harrison C, Britt H, Miller G, et al. Examining different measures of multimorbidity,
- 39 using a large prospective cross-sectional study in Australian general practice. *BMJ*
- 40 *Open* 2014;4(7):e004694.
- 41
- 42 47. Pang J, Hsu JP, Yeo TW, et al. Diabetes, cardiac disorders and asthma as risk factors
- 43 for severe organ involvement among adult dengue patients: A matched case-control
- 44 study. *Scientific reports* 2017;7:39872. doi: 10.1038/srep39872 [published Online
- 45 First: 2017/01/04]
- 46
- 47 48. Mirza AMB, Fida M, Murtaza G, et al. Association of metabolic factors with dengue
- 48 viral infection on admission triage which predict its clinical course during Lahore
- 49 dengue epidemic. *JPMA* 2016;66(1102)
- 50
- 51 49. Toledo J, George L, Martinez E, et al. Relevance of non-communicable comorbidities
- 52 for the development of the severe forms of dengue: a systematic literature review.
- 53 *PLoS Neglected Tropical Diseases* 2016;10(1):e0004284.
- 54
- 55 50. Htun NSN, Odermatt P, Eze IC, et al. Is diabetes a risk factor for a severe clinical
- 56 presentation of dengue?-review and meta-analysis. *PLoS Neglected Tropical*
- 57 *Diseases* 2015;9(4):e0003741.
- 58
- 59 51. Garin N, Olaya B, Perales J, et al. Multimorbidity patterns in a national representative
- 60 sample of the Spanish adult population. *PloS One* 2014;9(1):e84794.
- 52 Starfield B, Shi L, Macinko J. Contribution of primary care to health systems and
- 53 health. *The Milbank quarterly* 2005;83(3):457-502. doi: 10.1111/j.1468-
- 54 0009.2005.00409.x [published Online First: 2005/10/06]

1  
2  
3  
4  
5  
6  
7  
8  
9  
10  
11  
12  
13  
14  
15  
16  
17  
18  
19  
20  
21  
22  
23  
24  
25  
26  
27  
28  
29  
30  
31  
32  
33  
34  
35  
36  
37  
38  
39  
40  
41  
42  
43  
44  
45  
46  
47  
48  
49  
50  
51  
52  
53  
54  
55  
56  
57  
58  
59  
60

For peer review only



1  
2  
3  
4  
5  
6  
7  
8  
9  
10  
11  
12  
13  
14  
15  
16  
17  
18  
19  
20  
21  
22  
23  
24  
25  
26  
27  
28  
29  
30  
31  
32  
33  
34  
35  
36  
37  
38  
39  
40  
41  
42  
43  
44  
45  
46  
47  
48  
49  
50  
51  
52  
53  
54  
55  
56  
57  
58  
59  
60

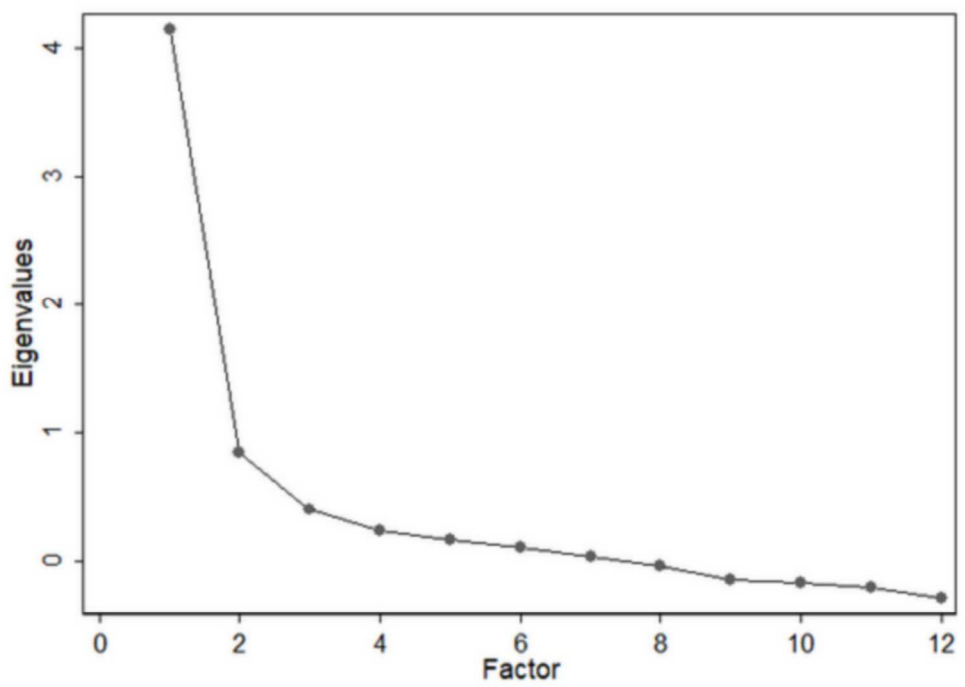

Figure 1 Scree plot for women  
Note: The graph shows one factors before the inflection point in the curve (eigenvalue >1)  
143x104mm (300 x 300 DPI)

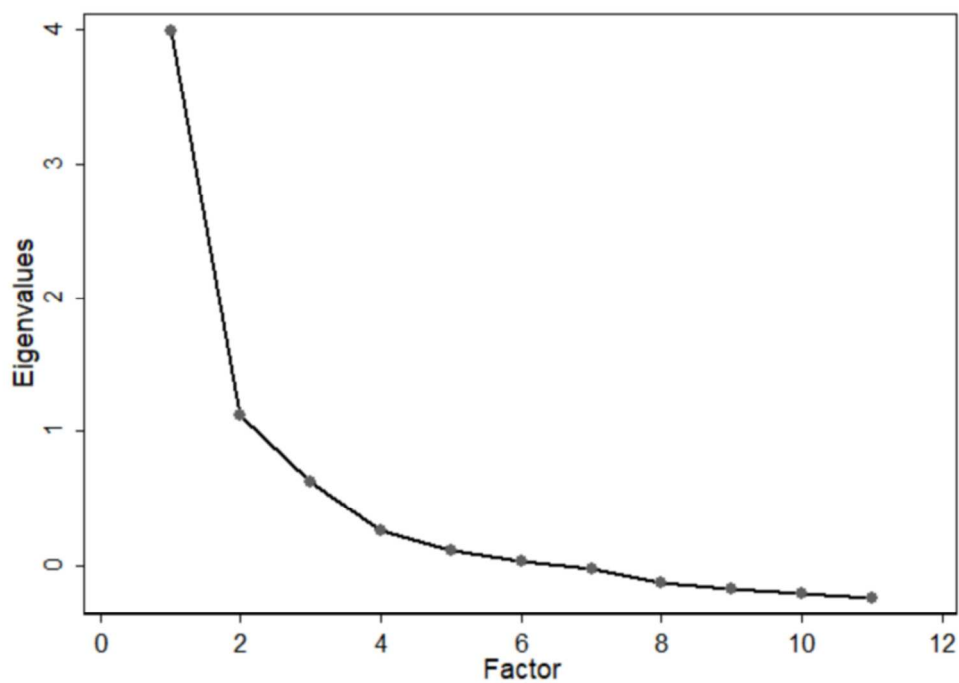

Figure 2 Scree plot for men

Note: The graph shows two factors before the inflection point in the curve (eigenvalue >1)

125x91mm (300 x 300 DPI)

**STROBE 2007 (v4) checklist of items to be included in reports of observational studies in epidemiology\***  
**Checklist for cohort, case-control, and cross-sectional studies (combined)**

| Section/Topic             | Item # | Recommendation                                                                                                                                                                                                                                                                                                                                                                                                                                                         | Reported on page # |
|---------------------------|--------|------------------------------------------------------------------------------------------------------------------------------------------------------------------------------------------------------------------------------------------------------------------------------------------------------------------------------------------------------------------------------------------------------------------------------------------------------------------------|--------------------|
| Title and abstract        | 1      | (a) Indicate the study’s design with a commonly used term in the title or the abstract                                                                                                                                                                                                                                                                                                                                                                                 | 1                  |
|                           |        | (b) Provide in the abstract an informative and balanced summary of what was done and what was found                                                                                                                                                                                                                                                                                                                                                                    | 1,2                |
| <b>Introduction</b>       |        |                                                                                                                                                                                                                                                                                                                                                                                                                                                                        |                    |
| Background/rationale      | 2      | Explain the scientific background and rationale for the investigation being reported                                                                                                                                                                                                                                                                                                                                                                                   | 3                  |
| Objectives                | 3      | State specific objectives, including any pre-specified hypotheses                                                                                                                                                                                                                                                                                                                                                                                                      | 3                  |
| <b>Methods</b>            |        |                                                                                                                                                                                                                                                                                                                                                                                                                                                                        |                    |
| Study design              | 4      | Present key elements of study design early in the paper                                                                                                                                                                                                                                                                                                                                                                                                                | 3,4                |
| Setting                   | 5      | Describe the setting, locations, and relevant dates, including periods of recruitment, exposure, follow-up, and data collection                                                                                                                                                                                                                                                                                                                                        | 4                  |
| Participants              | 6      | (a) <i>Cohort study</i> —Give the eligibility criteria, and the sources and methods of selection of participants. Describe methods of follow-up<br><i>Case-control study</i> —Give the eligibility criteria, and the sources and methods of case ascertainment and control selection. Give the rationale for the choice of cases and controls<br><i>Cross-sectional study</i> —Give the eligibility criteria, and the sources and methods of selection of participants | 4                  |
|                           |        | (b) <i>Cohort study</i> —For matched studies, give matching criteria and number of exposed and unexposed<br><i>Case-control study</i> —For matched studies, give matching criteria and the number of controls per case                                                                                                                                                                                                                                                 | -                  |
| Variables                 | 7      | Clearly define all outcomes, exposures, predictors, potential confounders, and effect modifiers. Give diagnostic criteria, if applicable                                                                                                                                                                                                                                                                                                                               | 4                  |
| Data sources/ measurement | 8*     | For each variable of interest, give sources of data and details of methods of assessment (measurement). Describe comparability of assessment methods if there is more than one group                                                                                                                                                                                                                                                                                   | 4                  |
| Bias                      | 9      | Describe any efforts to address potential sources of bias                                                                                                                                                                                                                                                                                                                                                                                                              | -                  |
| Study size                | 10     | Explain how the study size was arrived at                                                                                                                                                                                                                                                                                                                                                                                                                              | 4                  |
| Quantitative variables    | 11     | Explain how quantitative variables were handled in the analyses. If applicable, describe which groupings were chosen and why                                                                                                                                                                                                                                                                                                                                           | 4                  |
| Statistical methods       | 12     | (a) Describe all statistical methods, including those used to control for confounding                                                                                                                                                                                                                                                                                                                                                                                  | 5                  |
|                           |        | (b) Describe any methods used to examine subgroups and interactions                                                                                                                                                                                                                                                                                                                                                                                                    | -                  |
|                           |        | (c) Explain how missing data were addressed                                                                                                                                                                                                                                                                                                                                                                                                                            | -                  |
|                           |        | (d) <i>Cohort study</i> —If applicable, explain how loss to follow-up was addressed<br><i>Case-control study</i> —If applicable, explain how matching of cases and controls was addressed                                                                                                                                                                                                                                                                              | 4                  |

|                          |     |                                                                                                                                                                                                              |             |
|--------------------------|-----|--------------------------------------------------------------------------------------------------------------------------------------------------------------------------------------------------------------|-------------|
|                          |     | <i>Cross-sectional study</i> —If applicable, describe analytical methods taking account of sampling strategy                                                                                                 |             |
|                          |     | (e) Describe any sensitivity analyses                                                                                                                                                                        | -           |
| <b>Results</b>           |     |                                                                                                                                                                                                              |             |
| Participants             | 13* | (a) Report numbers of individuals at each stage of study—eg numbers potentially eligible, examined for eligibility, confirmed eligible, included in the study, completing follow-up, and analysed            | 6           |
|                          |     | (b) Give reasons for non-participation at each stage                                                                                                                                                         | -           |
|                          |     | (c) Consider use of a flow diagram                                                                                                                                                                           | -           |
| Descriptive data         | 14* | (a) Give characteristics of study participants (eg demographic, clinical, social) and information on exposures and potential confounders                                                                     | 6           |
|                          |     | (b) Indicate number of participants with missing data for each variable of interest                                                                                                                          | -           |
|                          |     | (c) <i>Cohort study</i> —Summarise follow-up time (eg, average and total amount)                                                                                                                             | -           |
| Outcome data             | 15* | <i>Cohort study</i> —Report numbers of outcome events or summary measures over time                                                                                                                          | -           |
|                          |     | <i>Case-control study</i> —Report numbers in each exposure category, or summary measures of exposure                                                                                                         | -           |
|                          |     | <i>Cross-sectional study</i> —Report numbers of outcome events or summary measures                                                                                                                           | 6           |
| Main results             | 16  | (a) Give unadjusted estimates and, if applicable, confounder-adjusted estimates and their precision (eg, 95% confidence interval). Make clear which confounders were adjusted for and why they were included | 7,8,9,10,11 |
|                          |     | (b) Report category boundaries when continuous variables were categorized                                                                                                                                    | 6           |
|                          |     | (c) If relevant, consider translating estimates of relative risk into absolute risk for a meaningful time period                                                                                             | -           |
| Other analyses           | 17  | Report other analyses done—eg analyses of subgroups and interactions, and sensitivity analyses                                                                                                               | 12,13       |
| <b>Discussion</b>        |     |                                                                                                                                                                                                              |             |
| Key results              | 18  | Summarise key results with reference to study objectives                                                                                                                                                     | 13,14       |
| Limitations              | 19  | Discuss limitations of the study, taking into account sources of potential bias or imprecision. Discuss both direction and magnitude of any potential bias                                                   | 14          |
| Interpretation           | 20  | Give a cautious overall interpretation of results considering objectives, limitations, multiplicity of analyses, results from similar studies, and other relevant evidence                                   | 14,15,16    |
| Generalisability         | 21  | Discuss the generalisability (external validity) of the study results                                                                                                                                        | 16          |
| <b>Other information</b> |     |                                                                                                                                                                                                              |             |
| Funding                  | 22  | Give the source of funding and the role of the funders for the present study and, if applicable, for the original study on which the present article is based                                                | 17          |

\*Give information separately for cases and controls in case-control studies and, if applicable, for exposed and unexposed groups in cohort and cross-sectional studies.

**Note:** An Explanation and Elaboration article discusses each checklist item and gives methodological background and published examples of transparent reporting. The STROBE checklist is best used in conjunction with this article (freely available on the Web sites of PLoS Medicine at <http://www.plosmedicine.org/>, Annals of Internal Medicine at <http://www.annals.org/>, and Epidemiology at <http://www.epidem.com/>). Information on the STROBE Initiative is available at [www.strobe-statement.org](http://www.strobe-statement.org).

# BMJ Open

## Prevalence and patterns of multimorbidity in Amazon Region of Brazil and associated determinants: a cross-sectional study

|                                 |                                                                                                                                                                                                                                                                                                                                                                                                                                                                                                                                         |
|---------------------------------|-----------------------------------------------------------------------------------------------------------------------------------------------------------------------------------------------------------------------------------------------------------------------------------------------------------------------------------------------------------------------------------------------------------------------------------------------------------------------------------------------------------------------------------------|
| Journal:                        | <i>BMJ Open</i>                                                                                                                                                                                                                                                                                                                                                                                                                                                                                                                         |
| Manuscript ID                   | bmjopen-2018-023398.R2                                                                                                                                                                                                                                                                                                                                                                                                                                                                                                                  |
| Article Type:                   | Research                                                                                                                                                                                                                                                                                                                                                                                                                                                                                                                                |
| Date Submitted by the Author:   | 21-Aug-2018                                                                                                                                                                                                                                                                                                                                                                                                                                                                                                                             |
| Complete List of Authors:       | Araujo, Elizete; University of Brasilia, Post-Graduate Program Health Sciences; Federal University of Amazonas, Getulio Vargas University Hospital<br>Silva, Marcus; Federal University of Amazonas, Faculty Medicine; University of Sorocaba, Post- Graduate Program of Pharmaceutical Science<br>Galvao, Tais; State University of Campinas, Faculty of Pharmaceutical Sciences<br>Nunes, BP; Federal University of Pelotas, Department of Nursing in Public Health<br>Pereira, Mauricio; University of Brasilia, Faculty of Medicine |
| <b>Primary Subject Heading</b>: | Health services research                                                                                                                                                                                                                                                                                                                                                                                                                                                                                                                |
| Secondary Subject Heading:      | Epidemiology, Health policy, Health services research                                                                                                                                                                                                                                                                                                                                                                                                                                                                                   |
| Keywords:                       | Prevalence, Multimorbidity, Cross-Sectional Studies, Population Surveys, Brazil                                                                                                                                                                                                                                                                                                                                                                                                                                                         |
|                                 |                                                                                                                                                                                                                                                                                                                                                                                                                                                                                                                                         |

SCHOLARONE™  
Manuscripts

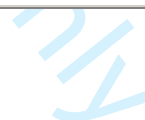

1  
2  
3 **Prevalence and patterns of multimorbidity in Amazon Region of Brazil and associated**  
4 **determinants: a cross-sectional study**  
5

6 Corresponding author

7  
8 Maria Elizete de Almeida Araujo

9  
10 University of Brasilia, Health Sciences Graduate Program, Faculty of Medicine

11  
12 Conj. 16, Sala 77, Asa Norte, Brasília-DF, Brasil

13  
14 70910-900 Campus Universitário Darcy Ribeiro Phone +55 (92) 36563374

15  
16 E-mail: [elizetemanaus@gmail.com](mailto:elizetemanaus@gmail.com)

17  
18 Authors

19  
20 Maria Elizete de Almeida Araujo, Post-Graduate Program Health Sciences, University of  
21 Brasília, PhD

22  
23 Getulio Vargas University Hospital, Federal University of Amazonas.

24  
25 Marcus Tolentino Silva, Faculty of Medicine, Federal University of Amazonas, Manaus,  
26 Amazonas, Brazil, Assistant Professor.

27  
28 Post-Graduate Program of Pharmaceutical Sciences, University of Sorocaba, Sorocaba, Sao  
29 Paulo, Brazil, Assistant Professor.

30  
31 Tais Freire Galvao, Faculty of Pharmaceutical Sciences, State University of Campinas,  
32 Campinas, Sao Paulo, Brazil, Assistant Professor

33  
34 Bruno P Nunes, Department of Nursing in Public Health, Federal University of Pelotas,  
35 Pelotas, Rio Grande do Sul, Brazil, Assistant Professor

36  
37 Mauricio G. Pereira, Faculty of Medicine, University of Brasilia, Federal District, Brazil,  
38 Full Professor.

39  
40  
41 **Abbreviated running title:** Multimorbidity in Amazonas Region

42  
43 Word count: 3180

44  
45 **ABSTRACT**

46  
47 **Objectives:** To estimate the prevalence of multimorbidity and to identify factors associated  
48 with it in the adult population from the metropolitan region of Manaus.

49  
50 **Design:** Cross-sectional population-based study.

51  
52 **Setting:** Interviews conducted between May and August of 2015 in eight cities that  
53 compose the metropolitan region of Manaus, Amazonas, Brazil.

54  
55 **Participants:** 4 001 adults aged  $\geq 18$  years.  
56  
57  
58  
59  
60

**Primary outcome measures:** Multimorbidity, measured by the occurrence of  $\geq 2$  and  $\geq 3$  chronic diseases, was the primary outcome. The associated factors were investigated by calculating the prevalence ratio (PR) obtained by Poisson regression, with robust adjustment of the variance in a hierarchical model. A factor analysis was conducted to investigate multimorbidity clusters.

**Results:** Half of the interviewees were women. The presence of a chronic disease was reported by 57.2% (95% CI 56.6% to 59.7%) of the interviewees, and the mean morbidity was 1.2 (1.1-1.2); 29.0% (95% CI 27.6% to 30.5%) reported  $\geq 2$  morbidities, and 15.2% (95% CI 14.1% to 16.4%) reported  $\geq 3$  chronic conditions. Back pain was reported by one-third of the interviewees. Multimorbidity was highest in women, PR = 1.66 (95% CI 1.50 to 1.83); the elderly, PR = 5.68 (95% CI 4.51 to 7.15); and individuals with worse health perception, PR = 3.70 (95% CI 2.73-5.00). Associated factors also included undergoing medical consultations, hospitalization in the last year, suffering from dengue in the last year and seeking the same healthcare service. Factor analysis revealed a pattern of multimorbidity in women. The factor loading the most strength of association in women was heart disease. In men, an association was identified in two groups, and lung disease was the disease with the highest factorial loading.

**Conclusion:** Multimorbidity was frequent in the metropolitan region of Manaus. It occurred most often in women, in the elderly and in those with worse health perception.

**Keywords:** Prevalence, Multimorbidity, Cross-Sectional Studies, Population Surveys, Brazil.

**Strengths and limitations of this study:**

This is the first study on the prevalence of multimorbidity in adults from the metropolitan region of Manaus, Amazonas, Brazil, using data from a population-based survey.

We used probabilistic complex sampling in three stages, census track, household and individual, to include 4 001 adults living in one of the eight cities of the metropolitan region.

This research increases knowledge about the epidemiologic factors associated with multimorbidity.

The method used to measure outcomes, self-report, is subject to errors and influenced by memory bias.

## BACKGROUND

Multimorbidity is the occurrence of different chronic clinical conditions in an individual, without a single condition being considered the main cause.<sup>1 2</sup> Multimorbidity is operationally defined as the occurrence of two or more chronic diseases.<sup>3-5</sup> In recent decades, population ageing, lifestyle changes, improved socio-economic conditions, and increased diagnostic ability of health services have contributed to a significant rise in the population that survives serious diseases, causing an accumulation of health problems in specific population groups. This situation has contributed to the increased prevalence of multimorbidity.<sup>6-8</sup>

The frequency of multimorbidity varies according to the evaluated diseases, the age of the population, the individual's socioeconomic and demographic level, and the individual's health condition. The rising prevalence of multimorbidity has resulted in higher costs of health services.<sup>9-12</sup> The costs associated with multimorbidity can reach 75% of total health expenditures, which includes physician consultation, hospitalization, odontological care, medication and rehabilitation.<sup>13</sup> In Brazil, multimorbidity ranged from 26% to 29% in adults living in the southern—and more developed—region and from 14% to 19% in the northern region.<sup>14</sup> Studies in specific populations conducted in the south and southeast Brazilian regions identified higher prevalence of multimorbidity in women and the elderly than in other groups.<sup>15 16</sup> Differences detected suggest heterogeneity due to socioeconomic development.<sup>17</sup> In northern Brazil, there is a lack of studies identifying more susceptible groups and studies that expand our knowledge about multimorbidity at the local level.

To obtain evidence of the health status and usage of health services, a large survey was performed in 2015 in the Manaus metropolitan region,<sup>18 19</sup> the most populated region and largest economic cluster in northern Brazil. This region comprises more than 60% of the 3.5 million people of Amazonas, which has the largest land area, the lowest population density, and the highest population of indigenous people (4.7%) in Brazil.<sup>20</sup> Health coverage is mainly public (Unified Health System), and this region had the lowest coverage of health insurance in the country in 2013 (13.0%).<sup>21</sup> The present research estimated the



1  
2  
3 prevalence of and factors associated with multimorbidity in the adult population of the  
4 metropolitan region of Manaus.

## 6 **METHODS**

### 8 **Study design**

10 This is a cross-sectional population-based study on the urban population of the  
11 metropolitan region of Manaus, consisting of the capital of Amazonas, Manaus, and seven  
12 surrounding cities. Multimorbidity was considered a primary outcome, which was  
13 categorized as  $\geq 2$  or  $\geq 3$  chronic diseases. The present analysis is part of a larger study  
14 aimed to examine the use of health services and inputs in the region from May to August  
15 2015. Details of the study design and the representativeness of the sample are available  
16 elsewhere.<sup>18</sup>

### 22 **Participants and study size**

24 We calculated the sample size as 4 000 adults  $\geq 18$  years old to be interviewed, who  
25 were selected by probabilistic complex sampling—by cluster and stratified by sex and  
26 age—in three stages (census track, household and individual).<sup>18</sup> We assume an estimated  
27 50% prevalence of use of health services, considering a CI of 95%, absolute precision of  
28 2% and a design effect of 1.5.<sup>22</sup> We added 10% to compensate for possible losses and  
29 refusals.

### 34 **Variables and data collection**

36 The primary outcome was self-reported multimorbidity, defined as two or more  
37 affirmative answers to any of the following questions: "Have any doctors ever diagnosed  
38 you with [...]" [1] hypertension, [2] diabetes, [3] high cholesterol, [4] heart disease (heart  
39 attack, angina, heart failure or other), [5] stroke, [6] asthma or asthmatic bronchitis, [7]  
40 arthritis or rheumatism, [8] depression, [9] pulmonary disease (pulmonary emphysema,  
41 chronic bronchitis or chronic obstructive pulmonary disease), [10] cancer, or [11] chronic  
42 kidney disease, and [12] "Do you have any chronic spinal problems, such as chronic back  
43 or neck pain, low back pain, sciatic pain, vertebral or disc problems?" These questions were  
44 previously used in the National Health Survey.<sup>23</sup>

46 The independent variables were sex; age (18 to 24; 25 to 34; 35 to 44; 45 to 59 and  
47  $\geq 60$  years);<sup>24</sup> marital status; self-reported skin colour; education; social class;<sup>25</sup> occupation;  
48 private health insurance (yes, no); self-perception of health status; place of attendance

1  
2  
3 (capital, countryside); seeking the same healthcare service when in need of attendance  
4 (health reference; yes, no); physician visit in the last 12 months (yes, no); hospitalization in  
5 the last year (yes, no); malaria in the last 12 months (yes, no); dengue in the last 12 months  
6 (yes, no); and types of services one usually seeks when in need of medical care (primary,  
7 secondary, or tertiary).  
8  
9

10  
11 Interviewers with experience in conducting home interviews collected the data on a  
12 mobile electronic device (Samsung® Galaxy Tab3 SM-T110). Interview records were  
13 transmitted over the Internet and stored using Survey To Go software (Dooblo Ltd., Israel).  
14  
15

### 16 **Statistical analyses**

17  
18 Statistical analyses were carried out in Stata v. 14.2. In all calculations, the complex  
19 sampling design was weighted by incorporating sample weights (*svy* command).  
20  
21

22 Descriptive statistics were initially obtained through prevalence calculation. The  
23 respective confidence intervals and P values of difference were calculated by Pearson's chi-  
24 square between sociodemographic characteristics and multimorbidity. The prevalence of  
25 the most common diseases stratified by sex, age group and multimorbidity was also  
26 calculated. At this stage, morbidities with a prevalence of <5% were excluded.  
27  
28

29 Bivariate analyses were performed between all independent and dependent variables  
30 to calculate prevalence ratios (PRs) and 95% confidence intervals (CIs). To identify the  
31 factors associated with multimorbidity, PRs were adjusted using Poisson regression with  
32 robust variance adjustment.<sup>26-28</sup>  
33  
34

35 A hierarchical model consisting of three blocks was constructed of the most distal to  
36 the most proximal determinants of multimorbidity: (1) demographic variables (sex, age,  
37 race, marital status); (2) socioeconomic variables (economic, education classification,  
38 occupation); and (3) health variables (private health insurance, health status, demand for the  
39 same health service, physician visit, hospitalization, dengue, malaria and type of service  
40 usually used). The variables from the first block were retained for the next stage if they  
41 presented a p-value  $\leq 0.05$ . Multicollinearity among the independent variables was  
42 discarded by assessing the variance inflation factors.<sup>29</sup>  
43  
44

45 Exploratory factor analysis stratified by sex was performed to identify  
46 multimorbidity patterns, i.e., to identify associations, selecting variables with potentially  
47 common causal factors, such as interaction between diseases and/or common risk factors.<sup>30</sup>  
48  
49  
50  
51  
52  
53  
54  
55  
56  
57  
58  
59  
60

<sup>31</sup> The tetrachoric correlation coefficient was used in the analysis because it is better than Pearson's correlation coefficient for dichotomous outcomes.<sup>32</sup> The suitability of the sampling was evaluated by the Kaiser-Meyer-Olkin test (KMO), which was considered adequate if the index was  $\geq 0.70$ , and the Bartlett sphericity test, which was considered adequate if its p-value was  $\leq 0.05$ .<sup>30 33</sup> To establish the number of factors to be maintained, Cattell's scree plot was used, which represents the eigenvalues of the correlation matrix in descending order. The factor number extracted corresponds to the eigenvalue that produces the inflection point in the curve (eigenvalue  $> 1$ ) and explains the minimum variance ( $> 10\%$  for each component). Variables were defined as associated with a factor if they presented loads  $\geq 0.30$ <sup>30</sup> (the closer to 1, the greater the association). Oblique rotation (promax) was performed to allow for better interpretation of the factor analysis.<sup>30</sup>

### **Patient and public involvement**

Patients and public were involved in neither the design of the research question nor in developing plans for the design or implementation of the study. The study had no patient advisers. Outcomes were self-reported by patients based on pre-defined questions. Due to the cross-sectional nature of the study, feedback regarding the results was not planned for those involved.

## **RESULTS**

### **Participant characteristics**

Table 1 shows the characteristics of the participants, prevalence of any chronic disease, and multimorbidity. The sample was composed of 4 001 adults and had a response rate of 76%. Women constituted over half of the sample. About one-half of the interviewees were between 25 and 44 years old, and 81% were black, brown or indigenous. The predominant social stratum was the lower middle class (57%), and approximately one-third of the participants were students or housewives. More than half reported good health status (54%), and the majority had had a physician visit in the last year (76%). In the last 12 months, 7% reported dengue and 6% reported malaria. One-half of respondents reported seeking a tertiary health service when they needed care (47%). The prevalence of any chronic disease was 57.2% (95% CI 56.6 to 58.7%), with a mean  $\pm$  standard deviation of  $1.2 \pm 1.5$  chronic disease per person. This average increased with age ( $0.5 \pm 0.8$  in the 18 to 24-year-old group and  $2.5 \pm 1.9$  in those 60 years or above).

### Prevalence of multimorbidity

The prevalence of  $\geq 2$  chronic conditions was 29% (95% CI 27.6 to 30.5%), and that of  $\geq 3$  chronic diseases was 15.2% (95% CI 14.1 to 16.4%). Higher prevalence was observed in women, in widowers, in individuals with lower education, in retired individuals, in individuals who had the worst perceptions of health and in those who visited a doctor and were hospitalized in the last year than in others (Table 1). In the previous year, dengue was reported by 44% of those who had two or more chronic conditions.

Approximately half of women aged 35 to 59 years reported  $\geq 2$  morbidities (Table 2). Back pain was the most frequently reported health problem in both women and men, followed by hypertension. Women  $\geq 60$  years with two or more morbidities reported more hypertension (92.0%) than men did in the same age group (79.5%).

Table 1. Characteristics of participants and prevalence of multimorbidity (%), Manaus metropolitan region, Brazil, 2015 (n = 4 001)\*

| Variable                  | n (%)       | Any chronic disease % (95% CI) | p-value | Mean number of chronic health problems (95% CI) | Multimorbidity % (95% CI) |         |                     |         |
|---------------------------|-------------|--------------------------------|---------|-------------------------------------------------|---------------------------|---------|---------------------|---------|
|                           |             |                                |         |                                                 | ≥2                        | p-value | ≥3                  | p-value |
| Overall                   |             | 57.2 (55.6 to 58.7)            |         | 1.17 (1.1 to 1.2)                               | 29.0 (27.6 to 30.5)       |         | 15.2 (14.1 to 16.4) |         |
| Sex                       |             |                                | <0.001  |                                                 |                           | <0.001  |                     | <0.001  |
| Male                      | 1888 (47.2) | 52.1 (49.8 to 54.0)            |         | 0.9 (0.8 to 0.9)                                | 21.5 (19.7 to 23.4)       |         | 9.3 (8.1 to 10.7)   |         |
| Female                    | 2113 (52.7) | 61.8 (59.7 to 63.8)            |         | 1.39 (1.3 to 1.4)                               | 35.8 (33.8 to 37.8)       |         | 20.5 (18.8 to 22.3) |         |
| Age (years)               |             |                                | <0.001  |                                                 |                           | <0.001  |                     | <0.001  |
| 18 to 24                  | 838 (20.8)  | 37.0 (33.8 to 40.3)            |         | 0.5 (0.4 to 0.5)                                | 9.8 (7.9 to 12.0)         |         | 3.5 (2.5 to 5.0)    |         |
| 25 to 34                  | 1152 (28.7) | 49.6 (46.7 to 52.5)            |         | 0.8 (0.7 to 0.8)                                | 18.6 (16.4 to 20.9)       |         | 6.9 (5.6 to 8.5)    |         |
| 35 to 44                  | 843 (21.1)  | 61.0 (57.6 to 64.2)            |         | 1.1 (1.0 to 1.2)                                | 30.0 (27.0 to 33.2)       |         | 12.7 (10.6 to 15.1) |         |
| 45 to 59                  | 772 (19.3)  | 71.4 (68.0 to 74.4)            |         | 1.7 (1.6 to 1.8)                                | 46.6 (43.1 to 50.2)       |         | 28.1 (25.1 to 31.4) |         |
| ≥60                       | 396 (9.9)   | 86.1 (82.3 to 89.2)            |         | 2.5 (2.3 to 2.7)                                | 63.5 (58.6 to 68.1)       |         | 44.4 (39.6 to 49.3) |         |
| Marital status            |             |                                | <0.001  |                                                 |                           | <0.001  |                     | <0.001  |
| Single                    | 2173 (54.2) | 51.5 (49.3 to 53.5)            |         | 0.9 (0.8 to 0.9)                                | 20.8 (19.1 to 22.6)       |         | 10.3 (8.8 to 11.3)  |         |
| Married                   | 1409 (35.2) | 62.0 (59.4 to 64.5)            |         | 1.3 (1.2 to 1.4)                                | 35.3 (32.9 to 37.9)       |         | 19.6 (17.6 to 21.8) |         |
| Separated/divorced        | 260 (6.5)   | 65.6 (59.6 to 71.2)            |         | 1.5 (1.3 to 1.7)                                | 42.6 (36.8 to 48.7)       |         | 19.9 (15.5 to 25.2) |         |
| Widower                   | 159 (4.0)   | 79.3 (72.3 to 84.9)            |         | 2.2 (1.9 to 2.5)                                | 63.1 (55.3 to 70.2)       |         | 39.9 (32.5 to 47.7) |         |
| Skin colour               |             |                                | <0.001  |                                                 |                           | 0.0021  |                     | 0.0016  |
| White/yellow              | 774 (19.3)  | 51.7 (48.2 to 55.2)            |         | 1.1 (1.0 to 1.2)                                | 27.1 (24.1 to 30.4)       |         | 15.7 (13.3 to 18.5) |         |
| Black/brown/indigenous    | 3227 (80.5) | 58.5 (56.8 to 60.2)            |         | 1.2 (1.1 to 1.2)                                | 29.5 (27.9 to 31.1)       |         | 15.1 (13.9 to 16.4) |         |
| Schooling level           |             |                                | <0.001  |                                                 |                           | <0.001  |                     | <0.001  |
| High education or above§  | 158 (3.9)   | 57.1 (49.3 to 64.6)            |         | .2 (1.0 to 1.5)                                 | 32.6 (25.7 to 40.4)       |         | 16.1 (11.7 to 23.7) |         |
| High school               | 1903 (47.5) | 51.0 (48.8 to 53.3)            |         | 0.9 (0.8 to 1.0)                                | 22.5 (20.7 to 24.5)       |         | 9.0 (7.8 to 10.4)   |         |
| Middle school             | 649 (16.2)  | 50.0 (46.2 to 53.8)            |         | 0.9 (0.8 to 1.0)                                | 21.1 (18.2 to 24.4)       |         | 10.7 (8.8 to 13.3)  |         |
| Elementary school or less | 1291 (32.2) | 69.9 (67.4 to 72.4)            | <0.001  | 1.7 (1.6 to 1.8)                                | 42.1 (39.5 to 44.8)       |         | 26.5 (24.1 to 28.9) |         |
| Economic classification†  |             |                                |         |                                                 |                           | <0.001  |                     | <0.001  |
| A - B                     | 629 (15.7)  | 51.2 (47.2 to 55.1)            |         | 0.9 (0.8 to 1.1)                                | 24.6 (21.4 to 28.2)       |         | 11.1 (8.8 to 13.8)  |         |
| C                         | 2285 (57.1) | 55.5 (53.4 to 57.5)            |         | 1.0 (1.0 to 1.1)                                | 26.1 (24.3 to 27.9)       |         | 13.2 (11.9 to 14.7) |         |
| D - E                     | 1087 (27.2) | 64.3 (61.4 to 67.2)            |         | 1.5 (1.4 to 1.6)                                | 37.7 (34.9 to 40.7)       |         | 21.8 (19.4 to 24.3) |         |
| Occupation                |             |                                | <0.001  |                                                 |                           | <0.001  |                     | <0.001  |

| Variable                 | n (%)       | Any chronic disease % (95% CI) | p-value | Mean number of chronic health problems (95% CI) | Multimorbidity % (95% CI) |         |                     |         |
|--------------------------|-------------|--------------------------------|---------|-------------------------------------------------|---------------------------|---------|---------------------|---------|
|                          |             |                                |         |                                                 | ≥2                        | p-value | ≥3                  | p-value |
| Formal job               | 761 (19.0)  | 52.7 (49.1 to 56.2)            |         | 0.9 (0.8 to 1.0)                                | 22.7 (19.8 to 25.8)       |         | 9.2 (7.3 to 11.5)   |         |
| Informal job             | 1149 (28.7) | 55.9 (53.0 to 58.7)            |         | 1.0 (1.0 to 1.1)                                | 27.6 (25.1 to 30.3)       |         | 12.9 (11.1 to 15.0) |         |
| Retired                  | 315 (7.9)   | 79.2 (74.3 to 83.3)            |         | 2.4 (2.2 to 2.6)                                | 60.5 (55.4 to 65.8)       |         | 43.4 (38.0 to 49.0) |         |
| Student/housewife        | 1199 (29.8) | 55.0 (52.2 to 57.8)            |         | 1.1 (1.1 to 1.2)                                | 29.0 (25.5 to 31.6)       |         | 15.8 (13.8 to 18.0) |         |
| Unemployed               | 577 (14.4)  | 58.3 (54.2 to 62.3)            |         | 1.0 (0.9 to 1.1)                                | 23.1 (19.8 to 26.7)       |         | 11.2 (8.9 to 14.1)  |         |
| Private health insurance |             |                                | 0.348   |                                                 |                           | 0.697   |                     | 0.616   |
| Yes                      | 523 (13.0)  | 55.3 (51.0 to 59.5)            |         | 1.0 (0.9 to 1.29)                               | 28.0 (24.6 to 32.3)       |         | 14.5 (11.7 to 17.8) |         |
| No‡                      | 3478 (87.0) | 57.5 (55.8 to 59.1)            |         | 1.2 (1.1 to 1.2)                                | 29.0 (27.6 to 30.7)       |         | 15.3 (14.2 to 16.6) |         |
| Health status            |             |                                | <0.001  |                                                 |                           | <0.001  |                     | <0.001  |
| Very good                | 471 (11.9)  | 30.8 (26.8 to 35.2)            |         | 0.4 (0.47 to 0.5)                               | 9.7 (7.3 to 12.7)         |         | 3.1 (1.9 to 5.1)    |         |
| Good                     | 2175 (54.3) | 50.4 (48.3 to 52.5)            |         | 0.8 (0.8 to 0.9)                                | 20.3 (18.7 to 22.0)       |         | 7.9 (6.8 to 9.1)    |         |
| Fair                     | 1108 (27.7) | 75.1 (72.5 to 77.5)            |         | 1.7 (1.6 to 1.8)                                | 45.2 (42.3 to 48.1)       |         | 26.0 (23.5 to 28.6) |         |
| Bad                      | 193 (4.8)   | 88.6 (83.2 to 93.3)            |         | 2.6 (2.4 to 2.9)                                | 68.4 (61.6 to 74.6)       |         | 50.3 (43.3 to 57.3) |         |
| Very bad                 | 54 (1.3)    | 81.5 (68.9 to 89.7)            |         | 3.6 (3.0 to 4.3)                                | 77.7 (64.8 to 86.9)       |         | 70.3 (57.0 to 81.0) |         |
| City                     |             |                                | <0.001  |                                                 |                           | <0.001  |                     | <0.001  |
| Capital                  | 3479 (86.8) | 58.4 (56.8 to 60.0)            |         | 1.2 (1.1 to 1.2)                                | 30.2 (28.7 to 31.7)       |         | 15.8 (14.6 to 17.1) |         |
| Countryside              | 522 (13.1)  | 49.2 (44.9 to 53.5)            |         | 0.9 (0.8 to 1.0)                                | 21.5 (18.2 to 25.3)       |         | 11.3 (0.8 to 14.3)  |         |
| Health reference §       |             |                                | <0.001  |                                                 |                           | <0.001  |                     | <0.001  |
| Yes                      | 2434 (60.7) | 62.3 (60.3 to 64.2)            |         | 1.3 (1.2 to 1.4)                                | 34.4 (31.5 to 36.3)       |         | 18.7 (17.1 to 20.3) |         |
| No                       | 1567 (39.2) | 49.4 (46.9 to 51.9)            |         | 0.9 (0.8 to 0.9)                                | 20.8 (18.9 to 22.9)       |         | 9.8 (17.2 to 20.3)  |         |
| Physician visit          |             |                                | <0.001  |                                                 |                           | <0.001  |                     | <0.001  |
| Yes                      | 3066 (76.5) | 60.8 (59.0 to 62.5)            |         | 1.2 (1.2 to 1.3)                                | 32,1 (30.5 to 33.8)       |         | 17.4 (16.1 to 18.8) |         |
| No                       | 935 (23.4)  | 45.5 (42.3 to 48.7)            |         | 0.8 (0.7 to 0.9)                                | 18,9 (16.5 to 21.5)       |         | 8.2 (6.6 to 10.2)   |         |
| Hospitalization          |             |                                | <0.001  |                                                 |                           | <0.001  |                     | <0.001  |
| Yes                      | 273 (7.0)   | 72.9 (67.3 to 77.8)            |         | 1.2 (1.2 to 1.3)                                | 47,2 (41.4 to 53.2)       |         | 28.1 (23.1 to 33.8) |         |
| No                       | 3728 (93.0) | 56.1 (67.3 to 77.8)            |         | 0.8 (0.7 to 0.9)                                | 27,7 (26.3 to 29.2)       |         | 14.3 (13.2 to 15.4) |         |
| Dengue                   |             |                                | 0.002   |                                                 |                           | <0.001  |                     | <0.001  |
| Yes                      | 281 (7.0)   | 65.9 (60.1 to 71.2)            |         | 1.6 (1.4 to 1.8)                                | 44.2 (38.5 to 50.1)       |         | 27.6 (22.7 to 33.1) |         |
| No                       | 3720 (93.0) | 56.5 (54.9 to 58.1)            |         | 1.1 (1.0 to 1.1)                                | 27.9 (26.5 to 29.3)       |         | 14.3 (13.2 to 15.5) |         |
| Malaria                  |             |                                | 0.420   |                                                 |                           | 0.122   |                     | 0.014   |
| Yes                      | 234 (5.9)   | 54.6 (48.2 to 60.9)            |         | 1.3 (1.1 to 1.5)                                | 33.5 (27.7 to 39.8)       |         | 20.8 (16.1 to 26.5) |         |
| No                       | 3767 (94.0) | 57.3 (0.55 to 0.58)            |         | 1.1 (1.1 to 1.2)                                | 28.8 (27.3 to 30.2)       |         | 14.9 (13.8 to 16.0) |         |
| Medical attention        |             |                                | <0.001  |                                                 |                           | 0.048   |                     | 0.531   |

| Variable  | n (%)       | Any chronic disease % (95% CI) | p-value | Mean number of chronic health problems (95% CI) | Multimorbidity % (95% CI) |         |                     |         |
|-----------|-------------|--------------------------------|---------|-------------------------------------------------|---------------------------|---------|---------------------|---------|
|           |             |                                |         |                                                 | ≥2                        | p-value | ≥3                  | p-value |
| Primary   | 1208 (30.2) | 60.8 (58.0 to 63.5)            |         | 1.2 (1.1 to 1.3)                                | 29.9 (27.3 to 32.5)       |         | 15.2 (13.3 to 17.3) |         |
| Secondary | 598 (14.9)  | 62.3 (58.3 to 66.1)            |         | 1.3 (1.2 to 1.5)                                | 33.0 (29.4 to 36.9)       |         | 18.9 (15.9 to 22.2) |         |
| Tertiary  | 1886 (47.2) | 54.0 (51.8 to 56.3)            |         | 1.1 (1.0 to 1.2)                                | 27.7 (25.7 to 29.8)       |         | 14.3 (12.8 to 15.9) |         |
| Others    | 309 (7.7)   | 52.7 (47.2 to 58.3)            |         | 1.0 (0.9 to 1.2)                                | 26.2 (21.6 to 31.4)       |         | 14.2 (10.7 to 18.5) |         |

\* Descriptive statistics using simple frequency and Pearson  $\chi^2$  test

CI: confidence interval; physician visit, hospitalization, dengue and malaria in last 12 months; § tertiary education or higher; † Average household income in 2015: A-B, US\$6500-US\$1419; C, US\$463-US\$772; D-E, US\$205; ‡ People who use the public health service. § Seeking the same healthcare service when in need of attendance.

Table 2. Prevalence (%) of most common diseases stratified by sex, age and multimorbidity group, Manaus metropolitan region, Brazil, 2015\*

| Morbidities                         | n (%)      | Multimorbidity $\geq 2$ |                   |                    | Multimorbidity $\geq 3$ |                   |                    |
|-------------------------------------|------------|-------------------------|-------------------|--------------------|-------------------------|-------------------|--------------------|
|                                     |            | 18 to 34<br>n (%)       | 35 to 59<br>n (%) | $\geq 60$<br>n (%) | 18 to 34<br>n (%)       | 35 to 59<br>n (%) | $\geq 60$<br>n (%) |
| <b>Women (2113)</b>                 |            | 195 (18.4)              | 394 (47.0)        | 168 (76.9)         | 78 (7.0)                | 236 (28.1)        | 120 (55.0)         |
| Chronic spinal problem <sup>†</sup> | 747 (35.3) | 135 (42.6)              | 248 (75.6)        | 99 (96.1)          | 64 (20.1)               | 176 (53.6)        | 78 (75.7)          |
| Hypertension                        | 516 (24.4) | 78 (62.3)               | 211 (83.0)        | 126 (92.0)         | 94 (32.7)               | 149 (58.7)        | 98 (71.6)          |
| Arthritis or rheumatism             | 414 (19.5) | 66 (79.5)               | 197 (91.6)        | 110 (94.8)         | 33 (39.7)               | 146 (67.7)        | 92 (79.3)          |
| Hypercholesterolemia                | 425 (20.1) | 66 (79.5)               | 217 (90.8)        | 100 (97.0)         | 46 (55.4)               | 149 (62.4)        | 85 (82.5)          |
| Diabetes                            | 157 (7.4)  | 15 (93.7)               | 82 (90.2)         | 48 (96.0)          | 14 (87.4)               | 70 (76.6)         | 42 (84.5)          |
| Asthma or asthmatic bronchitis      | 155 (7.3)  | 50 (68.5)               | 54 (85.6)         | 19 (100.0)         | 28 (38.3)               | 46 (73.0)         | 19 (100.0)         |
| Depressive disorder                 | 158 (7.4)  | 44 (71.0)               | 69 (91.9)         | 21 (100.0)         | 19 (30.6)               | 55 (73.2)         | 20 (95.2)          |
| Heart disease <sup>‡</sup>          | 119 (5.6)  | 23 (71.8)               | 52 (98.1)         | 34 (100.0)         | 17 (53.0)               | 46 (86.7)         | 32 (94.0)          |
| <b>Men (1888)</b>                   |            | 102 (10.9)              | 220 (28.2)        | 84 (47.1)          | 32 (3.4)                | 89 (11.4)         | 56 (31.4)          |
| Chronic spinal problem <sup>†</sup> | 662 (35.0) | 77 (27.5)               | 149 (49.7)        | 54 (65.8)          | 20 (7.1)                | 63 (21.0)         | 42 (51.4)          |
| Hypertension                        | 271 (14.4) | 37 (77.1)               | 112 (76.7)        | 61 (79.5)          | 17 (35.3)               | 60 (41.1)         | 45 (58.6)          |
| Arthritis or rheumatism             | 179 (9.5)  | 25 (89.3)               | 80 (86.8)         | 50 (84.9)          | 13 (46.1)               | 45 (48.9)         | 38 (64.5)          |
| Hypercholesterolemia                | 171 (9.0)  | 24 (57.1)               | 85 (87.6)         | 28 (87.6)          | 14 (33.3)               | 48 (49.4)         | 25 (78.2)          |

p-values of all variables were  $\leq 0.002$

\* multimorbidity with prevalence  $\geq 5\%$ .

<sup>†</sup> chronic back pain or neck, low back pain, sciatica, vertebral or disc pain

<sup>‡</sup> heart disease, or heart attack, angina, cardiac insufficiency

Table 3 shows the results obtained for factors associated with multimorbidity. After adjustment, multimorbidity ( $\geq 2$  diseases) was associated with female sex (PR = 1.66, 95% CI 1.50 to 1.83), age between 45 and 59 years (PR = 4.36, 95% CI 3.48 to 5.46) and age  $\geq 60$  years (PR = 5.68, 95% CI 4.51 to 7.15). The presence of  $\geq 3$  diseases was associated with female sex (PR = 2.19, 95% CI 1.88 to 2.56), age 45 to 59 years (PR = 7.62, 95% CI 5.22 to 11.10), age  $\geq 60$  years (PR = 12.03, 95% CI 8.20 to 17.66), dengue in the last 12 months (PR = 1.36, 95% CI 1.13 to 1.64), and very poor health status (PR = 7.89, 95% CI 4.71 to 13.23). Having  $\geq 3$  chronic conditions increased the demand for physician visits, hospitalization in the last year, and demand for the same health service. Education, income, occupation, and malaria in the last 12 months did not show associations with multimorbidity.



Table 3. Adjusted prevalence ratio (PR) and 95% confidence interval (CI) for any chronic disease and multimorbidity  $\geq 2$  and  $\geq 3$ , according to sociodemographic and health variables based on hierarchical Poisson regression. Manaus metropolitan region, Brazil, 2015 (n = 4 001)

| Variable                      | Any chronic disease PR (95% CI) | P value | Multimorbidity PR (95% CI) |         |                       |         |
|-------------------------------|---------------------------------|---------|----------------------------|---------|-----------------------|---------|
|                               |                                 |         | $\geq 2$                   | P value | $\geq 3$              | P value |
| <b>Demographic block†</b>     |                                 |         |                            |         |                       |         |
| Sex                           |                                 |         |                            |         |                       |         |
| Male                          | 1.00                            |         | 1.00                       |         | 1.00                  |         |
| Female                        | 1.19 (1.12 to 1.25)             | <0.001  | 1.66 (1.50 to 1.83)        | <0.001  | 2.19 (1.88 to 2.56)   | <0.001  |
| Age group                     |                                 |         |                            |         |                       |         |
| 18 to 24                      | 1.00                            |         |                            |         | 1.00                  |         |
| 25 to 34                      | 1.33 (1.19 to 1.48)             | <0.001  | 1.81 (1.42 to 2.30)        | <0.001  | 1.88 (1.24 to 2.84)   | 0.003   |
| 35 to 44                      | 1.63 (1.47 to 1.81)             | <0.001  | 2.85 (2.26 to 3.60)        | <0.001  | 3.40 (2.28 to 5.06)   | <0.001  |
| 45 to 59                      | 1.91 (1.72 to 2.12)             | <0.001  | 4.36 (3.48 to 5.46)        | <0.001  | 7.62 (5.22 to 11.10)  | <0.001  |
| $\geq 60$                     | 2.32 (2.08 to 2.57)             | <0.001  | 5.68 (4.51 to 7.15)        | <0.001  | 12.03 (8.20 to 17.66) | <0.001  |
| Marital status                |                                 |         |                            |         |                       |         |
| Single                        | 1.00                            |         | 1.00                       |         | 1.00                  |         |
| Married                       | 1.09 (0.96 to 1.07)             | 0.521   | 1.20 (1.07 to 1.33)        | 0.001   | 1.21 (1.03 to 1.42)   | 0.017   |
| Separated/<br>divorced        | 1.00 (0.91 to 1.10)             | 0.961   | 1.24 (1.06 to 1.45)        | 0.006   | 0.93 (0.72 to 1.21)   | 0.620   |
| Widower                       | 0.96 (0.87 to 1.06)             | 0.475   | 1.18 (1.01 to 1.38)        | 0.032   | 0.99 (0.77 to 1.26)   | 0.962   |
| Skin colour                   |                                 |         |                            |         |                       |         |
| White/yellow                  | 1.00                            |         | 1.00                       |         | 1.00                  |         |
| Black/brown/<br>Indigenous    | 1.10 (1.02 to 1.18)             | 0.006   | 1.04 (0.93 to 1.16)        | 0.474   | 0.89 (0.75 to 1.05)   | 0.175   |
| <b>Socioeconomic block ‡</b>  |                                 |         |                            |         |                       |         |
| Education                     |                                 |         |                            |         |                       |         |
| High<br>education or<br>above | 1.00                            |         | 1.00                       |         | 1.00                  |         |
| High school                   | 1.00 (0.87 to 1.14)             | 0.976   | 0.89 (0.71 to 1.12)        | 0.357   | 0.73 (0.50 to 1.05)   | 0.091   |
| Middle school                 | 0.98 (0.84 to 1.13)             | 0.754   | 0.81 (0.63 to 1.06)        | 0.135   | 0.80 (0.53 to 1.20)   | 0.289   |
| Elementary<br>school or less  | 1.12 (0.98 to 1.29)             | 0.106   | 1.01 (0.80 to 1.28)        | 0.877   | 1.08 (0.75 to 1.55)   | 0.667   |
| Economic<br>classification    |                                 |         |                            |         |                       |         |
| A – B                         | 1.00                            |         | 1.00                       |         | 1.00                  |         |
| C                             | 1.04 (0.96 to 1.13)             | 0.361   | 1.01 (0.87 to 1.17)        | 0.881   | 1.05 (0.83 to 1.33)   | 0.656   |
| D – E                         | 1.06 (0.97 to 1.16)             | 0.207   | 1.15 (0.98 to 1.36)        | 0.075   | 1.15 (0.89 to 1.49)   | 0.254   |
| Occupation                    |                                 |         |                            |         |                       |         |
| Formal job                    | 1.00                            |         | 1.00                       |         | 1.00                  |         |
| Informal job                  | 0.95 (0.87 to 1.03)             | 0.223   | 0.97 (0.83 to 1.13)        | 0.728   | 0.98 (0.76 to 1.28)   | 0.929   |
| Retired                       | 0.95 (0.86 to 1.06)             | 0.363   | 1.11 (0.92 to 1.32)        | 0.258   | 1.39 (1.02 to 1.88)   | 0.033   |
| Student/<br>housewife         | 0.96 (0.87 to 1.05)             | 0.331   | 0.97 (0.83 to 1.14)        | 0.767   | 1.05 (0.81 to 1.36)   | 0.671   |
| Unemployed                    | 1.09 (0.99 to 1.20)             | 0.081   | 0.99 (0.81 to 1.20)        | 0.949   | 1.13 (0.83 to 1.54)   | 0.404   |
| <b>Health block §</b>         |                                 |         |                            |         |                       |         |

|    |                    |                     |        |                     |        |                      |        |
|----|--------------------|---------------------|--------|---------------------|--------|----------------------|--------|
| 1  |                    |                     |        |                     |        |                      |        |
| 2  |                    |                     |        |                     |        |                      |        |
| 3  | Private health     |                     |        |                     |        |                      |        |
| 4  | insurance          |                     |        |                     |        |                      |        |
| 5  | No                 | 1.00                |        | 1.00                |        | 1.00                 |        |
| 6  | Yes                | 0.99 (0.91 to 1.07) | 0.913  | 1.03 (0.90 to 1.18) | 0.593  | 1.04 (0.84 to 1.28)  | 0.771  |
| 7  | Health status      |                     |        |                     |        |                      |        |
| 8  | Very good          | 1.00                |        | 1.00                |        | 1.00                 |        |
| 9  | Good               | 1.43 (1.24 to 1.64) | <0.001 | 1.63 (1.23 to 2.15) | <0.001 | 1.81 (1.09 to 2.99)  | 0.020  |
| 10 | Fair               | 1.94 (1.69 to 2.23) | <0.001 | 2.84 (2.15 to 3.76) | <0.001 | 4.21 (2.56 to 6.93)  | <0.001 |
| 11 | Bad                | 2.01 (1.80 to 2.41) | <0.001 | 3.53 (2.64 to 4.71) | <0.001 | 6.25 (3.74 to 10.47) | <0.001 |
| 12 | Very bad           | 1.91 (1.60 to 2.27) | <0.001 | 3.70 (2.73 to 5.00) | <0.001 | 7.89 (4.71 to 13.23) | <0.001 |
| 13 | Health reference** |                     |        |                     |        |                      |        |
| 14 | No                 | 1.00                |        | 1.00                |        | 1.00                 |        |
| 15 | Yes                | 1.12 (1.06 to 1.19) | <0.001 | 1.33 (1.19 to 1.47) | <0.001 | 1.40 (1.20 to 1.63)  | <0.001 |
| 16 | Physician visit    |                     |        |                     |        |                      |        |
| 17 | No                 | 1.00                |        | 1.00                |        | 1.00                 |        |
| 18 | Yes                | 1.13 (1.05 to 1.22) | <0.001 | 1.22 (1.07 to 1.40) | 0.002  | 1.33 (1.09 to 1.64)  | 0.005  |
| 19 | Hospitalization    |                     |        |                     |        |                      |        |
| 20 | No                 | 1.00                |        | 1.00                |        | 1.00                 |        |
| 21 | Yes                | 1.18 (1.09 to 1.27) | <0.001 | 1.36 (1.20 to 1.54) | <0.001 | 1.43 (1.17 to 1.74)  | <0.001 |
| 22 | Dengue             |                     |        |                     |        |                      |        |
| 23 | No                 | 1.00                |        | 1.00                |        | 1.00                 |        |
| 24 | Yes                | 1.07 (0.99 to 1.16) | 0.079  | 1.23 (1.08 to 1.41) | 0.001  | 1.36 (1.13 to 1.64)  | 0.001  |
| 25 | Malaria            |                     |        |                     |        |                      |        |
| 26 | No                 | 1.00                |        | 1.00                |        | 1.00                 |        |
| 27 | Yes                | 0.98 (0.82 to 1.01) | 0.109  | 0.96 (0.81 to 1.13) | 0.653  | 0.99 (0.78 to 1.26)  | 0.947  |
| 28 | Type of service    |                     |        |                     |        |                      |        |
| 29 | Primary            | 1.00                |        | 1.00                |        | 1.00                 |        |
| 30 | Secondary          | 1.02 (0.95 to 1.09) | 0.518  | 1.07 (0.95 to 1.22) | 0.265  | 1.15 (0.95 to 1.40)  | 0.129  |
| 31 | Tertiary           | 0.95 (0.89 to 1.00) | 0.086  | 1.01 (0.92 to 1.12) | 0.780  | 1.05 (0.90 to 1.25)  | 0.489  |
| 32 | Outros             | 0.92 (0.82 to 1.03) | 0.180  | 0.97 (0.80 to 1.17) | 0.723  | 1.13 (0.85 to 1.51)  | 0.374  |

Significant variables kept in each block of analysis:

**Any chronic disease:** †sex, age, marital status and race; ‡sex, age, marital status, education, income, occupation; §sex, age, marital status, income, occupation, private health insurance, health status, health reference, medical consultation in last 12 months, hospital admission in last 12 months, dengue, malaria and type of health service that usually comes

**≥2 morbidities:** †sex, age, marital status and race; ‡sex, age, marital status, education, income, occupation; §sex, age, marital status, income, occupation, private health insurance, health status, health reference, medical consultation in last 12 months, hospital admission in last 12 months, dengue, malaria and type of health service that usually comes

**≥3 morbidities:** †sex, age, marital status and race; ‡sex, age, marital status, education, income, occupation; §sex, age, marital status, income, occupation, private health insurance, health status, health reference, medical consultation in last 12 months, hospital admission in last 12 months, dengue, malaria and type of health service that usually comes

\*\* Seeking the same healthcare service when in need of attendance.

The factor analysis is presented in Table 4. The KMO coefficient was 0.82 for women and 0.78 for men, and the Bartlett sphericity test presented a p-value  $\leq 0.001$  for both, suggesting an adequate factor analysis. In women, one multimorbidity pattern

(supplemental figure 1) explained 81% of the total variance, including the 12 chronic diseases analysed. In men, two factors were identified (supplemental figure 2). In the first factor, heart diseases, chronic kidney disease, stroke, arthritis or rheumatism, chronic spinal problems, depressive disorders, asthma or bronchitis, and lung diseases were the associated chronic diseases, which explained a total of 62% of the variance. The second factor was essentially cardiometabolic, which explained 56% of the variance.

Table 4. Factor score of each chronic disease in women and men, Manaus metropolitan region, Brazil, 2015

| Morbidity                      | Women<br>(n=2113) |          | Men<br>(n=1888) |          |
|--------------------------------|-------------------|----------|-----------------|----------|
|                                | Factor 1          | Factor 1 | Factor 1        | Factor 2 |
| Hypercholesterolemia           | 0.70              |          |                 | 0.62     |
| Hypertension                   | 0.64              |          |                 | 0.78     |
| Heart disease                  | 0.72              | 0.40     |                 | 0.47     |
| Diabetes                       | 0.63              |          |                 | 0.85     |
| Chronic kidney disease         | 0.46              | 0.73     |                 |          |
| Stroke                         | 0.66              | 0.61     |                 |          |
| Arthritis                      | 0.65              | 0.40     |                 | 0.35     |
| Chronic spinal problem         | 0.46              | 0.44     |                 |          |
| Depressive disorder            | 0.49              | 0.58     |                 |          |
| Asthma or asthmatic bronchitis | 0.44              | 0.48     |                 |          |
| Lung diseases†                 | 0.53              | 0.76     |                 |          |
| Cancer‡                        | 0.52              |          |                 |          |
| Proportion of variance (%)     | 81.0              | 62.0     |                 | 56.0     |
| Kaiser-Meyer-Olkin             | 0.82              | 0.78     |                 |          |

Note: Kept factors were those with scores  $\geq 0.30$  after oblique rotation

† pulmonary emphysema, bronchitis, chronic obstructive lung disease

‡ cancer showed negative values in men and was excluded

## DISCUSSION

More than half of the adults had some chronic disease. The occurrence of two or more morbidities was reported by more than a quarter of the adults. Four out of twenty-five individuals reported a multimorbidity of three or greater. Female sex, elderly age, dengue in the last year, poor health status, seeking the same healthcare service when in need of attendance, physician visits and hospitalization presented associations with multimorbidity. Chronic spinal problems were the most commonly reported diseases.

We used a list of 12 self-reported chronic conditions—some of which were very broad—to assess the primary outcome of this study. A systematic review summarized 39

1  
2  
3 observational studies from 1993 to 2013 and identified a range of five to 335 diseases for  
4 the study of multimorbidity.<sup>3</sup> In previous studies, the fewer diseases included in the  
5 research was, the lower the prevalence observed became.<sup>5 34</sup> Regardless of the number of  
6 chronic conditions reported and how they were defined, multimorbidity estimates are  
7 influenced by self-report. Although widely applied,<sup>3 5 35</sup> such assessments are more likely to  
8 suffer classification bias or have no validated instrument for confirmation. In the present  
9 research, over-reporting or underreporting may have occurred,<sup>36</sup> as well as recall bias,  
10 which is more common in elderly individuals of lower socioeconomic and educational  
11 levels than among other individuals.<sup>7 37</sup> In addition, we did not investigate disease severity.  
12 Previous studies recommend inquiring about the degree of disease intensity and diseases'  
13 interference with routine activities and disabilities.<sup>5 35</sup> More reliable estimates of  
14 multimorbidity, using medical records, for example, are not available in the region.

15  
16  
17  
18  
19  
20  
21  
22  
23  
24 The response rate was 76%, which may constitute a source of selection bias. Efforts  
25 were made to improve representativeness by using predefined sex and age quotas and  
26 interviewing one individual per family, according to official estimates.<sup>38</sup> Survival bias may  
27 have also influenced the results, as patients who died prematurely from those causes, who  
28 were hospitalized or who had more serious diseases were not available in the household to  
29 participate in the survey. The cross-sectional nature of the study does not allow for  
30 investigation of temporal associations.

31  
32  
33  
34  
35  
36 This is the first local study to estimate the prevalence of multimorbidity in adults in  
37 the state of Amazonas. We used a cut-off point of  $\geq 2$  and  $\geq 3$  chronic diseases, as performed  
38 in previous studies.<sup>3 5</sup> We identified the most vulnerable multimorbidity groups to be  
39 women and the elderly. Multimorbidity was higher in older people and increased with age;  
40 this finding has been observed in previous studies.<sup>5 9 23</sup> The National Health Survey  
41 conducted in Brazil in 2013 reported that women are most affected among all  
42 socioeconomic groups, especially the elderly.<sup>39</sup>

43  
44  
45  
46  
47  
48 Our results showed similarities to a cross-sectional study conducted in 2012 in  
49 Pelotas city in the southern region of Brazil with 2927 subjects, in which 29.1% of the  
50 interviewees had more than two chronic diseases and 14% had three or more.<sup>40</sup> The 2013  
51 National Health Survey also confirmed these findings: 22% of Brazilians reported two or  
52 more chronic diseases, and 10% were affected by more than three.<sup>14</sup> The highest prevalence  
53  
54  
55  
56  
57  
58  
59  
60

1  
2  
3 was observed in the south (26 to 29%),<sup>14</sup> which is more economically developed and has  
4 greater access to health services than the north does.<sup>17 41</sup> Any chronic disease occurred in  
5 45% of Brazilians, with a lower prevalence in the north region.<sup>42</sup>  
6  
7

8 In other contexts, lower prevalence of multimorbidity was found. A survey  
9 conducted in 2012 in Italy, with 3 759 836 adults, detected that 15% of individuals  
10 presented two or more chronic diseases.<sup>10</sup> In Ireland, a representative sample of the  
11 population (11.3% of subjects  $\geq 50$  years) presented multiple diseases.<sup>12</sup> Furthermore, an  
12 electronic medical data analysis conducted in 2007 with 1 751 841 users of the Scottish  
13 Health Service found that 23% had multimorbidity.<sup>9</sup> In an economic context comparable to  
14 Brazil's, a population-based Indian study conducted in 2007 with 10 973 interviewees  
15 identified smaller proportions (28% had any chronic disease and approximately 9% had  
16 multimorbidity).<sup>43</sup>  
17  
18  
19  
20  
21  
22  
23

24 Two findings of our research are rarely described in previous studies: the higher  
25 frequency of multimorbidity at younger ages and the lack of association with economic  
26 status. One-half of adults aged 25 to 34 years and nearly two-thirds of interviewees aged 35  
27 to 44 years reported any chronic condition, and nearly one-third had multimorbidity. The  
28 development of multimorbidity in young adults is in agreement with previous data from  
29 Brazil.<sup>23 39 40</sup> It is important to emphasize that half of the population of the Manaus  
30 metropolitan region is concentrated in this age range (49% aged 25 to 44 years). A  
31 systematic review of 24 cross-sectional studies on multimorbidity found income as a  
32 conflicting factor across studies, associated either with richer or poorer individuals, while  
33 lower educational attainment was associated with a 64% higher chance of multimorbidity.<sup>44</sup>  
34 No association was found between income and multimorbidity after adjusting for  
35 socioeconomic variables.  
36  
37  
38  
39  
40  
41  
42  
43

44 In lower-income countries such as Brazil, which also faces economic austerity  
45 policies, rising unemployment and unstable social and health policies,<sup>45</sup> it is possible to  
46 predict a reduction in access to health services, with a consequent increase in morbidity.  
47 This effect has been observed in other austerity scenarios, in which this type of policy  
48 reduced jobs, education and use of health services, resulting in an increase of chronic  
49 diseases.<sup>46 47</sup> An analysis of high-income countries found that 3.6 more years of education  
50 reduces the risk of cardiovascular disease by one-third.<sup>48</sup>  
51  
52  
53  
54  
55  
56  
57  
58  
59  
60

1  
2  
3 Back pain was the most frequent disease, reported by one-third of the sample. In our  
4 study, this morbidity was assessed using several questions, which may have increased the  
5 sensitivity of the assessment. An even higher proportion (49%) of vertebral spine/back  
6 issues was observed in a representative cross-sectional survey of Brazilian adults.<sup>39</sup> In other  
7 contexts, similar prevalence values were estimated.<sup>49</sup>

8  
9  
10  
11 The presence of dengue was higher in individuals with multimorbidity, possibly due  
12 to the lower immunologic response observed in chronic diseases such as diabetes,  
13 rheumatoid arthritis, and asthma.<sup>50 51</sup> A systematic review of 16 cohort and case-control  
14 studies from 2007 to 2013 showed chronic diseases as risk factors for severe dengue.<sup>52</sup> In  
15 another meta-analysis of 10 studies conducted between 2006 and 2014,<sup>53</sup> diabetes was  
16 significantly associated with haemorrhagic dengue: regardless of demographic and  
17 socioeconomic characteristics, the association was 5% higher than that for individuals who  
18 did not have diabetes.

19  
20  
21  
22 A single multimorbidity pattern with all investigated diseases was identified in  
23 women. Heart disease presented the highest factor loading, but disease patterns are poorly  
24 explained due to the wide range of diseases included in one factor. This finding may be due  
25 to our measurement and analytical approach, including sex stratification, broad categories  
26 of diseases, and the number of chronic conditions investigated. In previous studies  
27 conducted in Brazil involving similar questions, up to three multimorbidity patterns have  
28 been identified: cardiometabolic, musculoskeletal-mental and respiratory.<sup>14 23 40</sup> Such  
29 studies did not stratify by sex when investigating the multimorbidity pattern. An Australian  
30 cohort with 13 715 women born between 1946-51 identified five multimorbidity patterns  
31 (psychosomatic, musculoskeletal, cardiometabolic, cancer and respiratory) after  
32 investigating 18 chronic diseases and 13 symptoms.<sup>54</sup> The greater number of diseases and  
33 symptoms may explain the number of clustering factors in women relative to our analysis  
34 (31 *versus* 12).

35  
36  
37  
38 In men, lung disease was the disease with the highest factorial loading on factor 1,  
39 but no clear pattern of diseases was found in the clustering of this factor. Factor 2 included  
40 cardiometabolic diseases, which could be explained by similar risk factors such as  
41 sedentary lifestyle and obesity. An analysis of 2 008 electronic medical records from the  
42  
43  
44  
45  
46  
47  
48  
49  
50  
51  
52  
53  
54  
55  
56  
57  
58  
59  
60

1  
2  
3 Spanish National Health System identified cardiometabolic patterns in both men and  
4 women in different age ranges.<sup>55</sup>

6 According to the results, it is estimated that over 1 300 000 residents of the  
7 metropolitan region of Manaus have a chronic condition, and nearly 700 000 have  
8 multimorbidity. Early diagnosis and treatment of chronic diseases, centred on primary care  
9 services, is a priority for enabling sustainability of the health system and a healthier  
10 society.<sup>56</sup>

## 15 CONCLUSION

16  
17 Multimorbidity was common in residents of the metropolitan region of Manaus and  
18 was associated with female sex, elderly people and poorer health perception. Prevention  
19 and control strategies should prioritize these groups. Future analyses should investigate the  
20 relationship between multimorbidity and the use and costs of health services in the region.

24  
25 **Contributors** MTS, TFG, and MEAA designed the study. MEAA, MTS and BNP  
26 performed the statistical analyses. MEAA, MTS, TFG, BNP and MGP interpreted the  
27 results and drafted the manuscript. All authors made critical revisions and provided  
28 intellectual content to the manuscript, approved the final version and agreed to be  
29 accountable for all aspects of this work.

32  
33  
34 **Funding** This work was funded by the National Council for Scientific and Technological  
35 Development (Conselho Nacional para o Desenvolvimento Científico e Tecnológico -  
36 CNPq), [404990/2013-4 and 448093/2014-6, to MTS] and the Foundation for Research  
37 Support of the State of Amazonas (Fundação de Amparo à Pesquisa do Estado do  
38 Amazonas - FAPEAM), [to MEAA].

41  
42 **Competing interest** None declared

43  
44 **Patient consent** Obtained

45  
46 **Ethics approval** The research project was approved by the Research Ethics Committee of  
47 the Federal University of Amazonas. All the individuals who agreed to participate signed a  
48 free and informed consent form.

49  
50 **Data sharing statement:** Data are available and can be accessed by contacting MTS.

## 55 REFERENCES

1. van den Akker M, Buntinx F, Knottnerus JA. Comorbidity or multimorbidity: what's in a name? A review of literature. *The European Journal of General Practice* 1996;2(2):65-70.
2. Le Reste JY, Nabbe P, Manceau B, et al. The European General Practice Research Network presents a comprehensive definition of multimorbidity in family medicine and long term care, following a systematic review of relevant literature. *Journal of the American Medical Directors Association* 2013;14(5):319-25.
3. Violan C, Foguet-Boreu Q, Flores-Mateo G, et al. Prevalence, determinants and patterns of multimorbidity in primary care: a systematic review of observational studies. *PloS One* 2014;9(7):e102149.
4. Diederichs C, Berger K, Bartels DB. The measurement of multiple chronic diseases—a systematic review on existing multimorbidity indices. *The Journals of Gerontology Series A: Biological Sciences and Medical Sciences* 2011;66(3):301-11.
5. Fortin M, Stewart M, Poitras M-E, et al. A systematic review of prevalence studies on multimorbidity: toward a more uniform methodology. *The Annals of Family Medicine* 2012;10(2):142-51.
6. Feigin V. Global, regional, and national life expectancy, all-cause mortality, and cause-specific mortality for 249 causes of death, 1980-2015: a systematic analysis for the Global Burden of Disease Study 2015. *The Lancet* 2016;388(10053):1459-544.
7. Hussain MA, Huxley RR, Al Mamun A. Multimorbidity prevalence and pattern in Indonesian adults: an exploratory study using national survey data. *BMJ Open* 2015;5(12):e009810.
8. Ryan A, Wallace E, O'Hara P, et al. Multimorbidity and functional decline in community-dwelling adults: a systematic review. *Health and Quality of Life Outcomes* 2015;13(1):168.
9. Barnett K, Mercer SW, Norbury M, et al. Epidemiology of multimorbidity and implications for health care, research, and medical education: a cross-sectional study. *The Lancet* 2012;380(9836):37-43.
10. Lenzi J, Avaldi VM, Rucci P, et al. Burden of multimorbidity in relation to age, gender and immigrant status: a cross-sectional study based on administrative data. *BMJ Open* 2016;6(12):e012812.
11. Lima-Costa MF, De Oliveira C, Macinko J, et al. Socioeconomic inequalities in health in older adults in Brazil and England. *American Journal of Public Health* 2012;102(8):1535-41.
12. Glynn LG, Valderas JM, Healy P, et al. The prevalence of multimorbidity in primary care and its effect on health care utilization and cost. *Family Practice* 2011;28(5):516-23.
13. Nagl A, Witte J, Hodek JM, et al. Relationship between multimorbidity and direct healthcare costs in an advanced elderly population. Results of the PRISCUS trial. *Zeitschrift für Gerontologie und Geriatrie* 2012;45(2):146-54. doi: 10.1007/s00391-011-0266-2 [published Online First: 2012/02/22]
14. Nunes BP, Chiavegatto Filho AD, Pati S, et al. Contextual and individual inequalities of multimorbidity in Brazilian adults: a cross-sectional national-based study. *BMJ Open* 2017;7(6):e015885.
15. de Souza Santos Machado V, Valadares AL, da Costa-Paiva LS, et al. Multimorbidity and associated factors in Brazilian women aged 40 to 65 years: a population-based



- study. *Menopause* 2012;19(5):569-75. doi: 10.1097/gme.0b013e3182455963 [published Online First: 2012/03/15]
16. Nunes BP, Thume E, Facchini LA. Multimorbidity in older adults: magnitude and challenges for the Brazilian health system. *BMC public health* 2015;15:1172. doi: 10.1186/s12889-015-2505-8 [published Online First: 2015/11/26]
17. Pinto DGC, Costa MAC, Marques MLdAC. Índice de desenvolvimento humano municipal brasileiro. Brasília: Programa das Nações Unidas para o Desenvolvimento, Instituto de Pesquisa Econômica Aplicada; 2013 [Available from: <http://repositorio.ipea.gov.br/handle/11058/2375> Acesso março de 2017.
18. Silva MT, Galvao TF. Use of health services among adults living in Manaus Metropolitan Region, Brazil: population-based survey, 2015. *Epidemiol Serv Saúde* 2017;26(4):725-34.
19. Araujo MEA, Silva MT, Galvao TF, et al. Prevalence of health services usage and associated factors in the Amazon region of Brazil: a population-based cross-sectional study. *BMJ Open* 2017;7(11) doi: 10.1136/bmjopen-2017-017966
20. Brasil. Instituto Brasileiro de Geografia e Estatística (IBGE). Censo demográfico de 2010. Os indígenas no censo demográfico de 2010. [Available from: [https://ww2.ibge.gov.br/indigenas/indigena\\_censo2010.pdf](https://ww2.ibge.gov.br/indigenas/indigena_censo2010.pdf) accessed 28/07/2018.
21. Viacava F, Bellido JG. Condições de saúde, acesso a serviços e fontes de pagamento, segundo inquéritos domiciliares. *Revista Ciência & Saúde Coletiva* 2016;21(2)
22. Kneipp SM, Yarandi HN. Complex sampling designs and statistical issues in secondary analysis. *Western Journal of Nursing Research* 2002;24(5):552-66.
23. Rzewuska M, de Azevedo-Marques JM, Coxon D, et al. Epidemiology of multimorbidity within the Brazilian adult general population: Evidence from the 2013 National Health Survey (PNS 2013). *PloS One* 2017;12(2):e0171813.
24. Macinko J, Mullachery P, Silver D, et al. Patterns of alcohol consumption and related behaviors in Brazil: Evidence from the 2013 National Health Survey (PNS 2013). *PloS One* 2015;10(7):e0134153.
25. ABEP. Associação Brasileira de Empresas de Pesquisa. Critério de Classificação Econômica Brasil; 2015 [Available from: <http://www.abep.org/criterio-brasil> accessed 10/08/2017.
26. Barros AJ, Hirakata VN. Alternatives for logistic regression in cross-sectional studies: an empirical comparison of models that directly estimate the prevalence ratio. *BMC Medical Research Methodology* 2003;3(1):1.
27. Espelt A, Mari-Dell'Olmo M, Penelo E, et al. Applied prevalence ratio estimation with different regression models: an example from a cross-national study on substance use research. *Adicciones* 2016;823
28. Victora CG, Huttly SR, Fuchs SC, et al. The role of conceptual frameworks in epidemiological analysis: a hierarchical approach. *Int J Epidemiol* 1997;26(1):224-27.
29. Fotouhi AR. Modelling overdispersion in longitudinal count data in clinical trials with application to epileptic data. *Contemporary Clinical Trials* 2008;29(4):547-54.
30. Norman G, Streiner D. Principal Components and factor analysis. fooling around with factors. biostatistics: the bare essentials: Hamilton: BMJ Publishing Group, 2008.
31. Kim JO, Mueller CW. Factor Analysis: Statistical Methods and Practical Issues: Sage 1978.

32. Kubinger KD. On artificial results due to using factor analysis for dichotomous variables. *Psychology Science* 2003;45(1):106-10.
33. Schäfer I, von Leitner E-C, Schön G, et al. Multimorbidity patterns in the elderly: a new approach of disease clustering identifies complex interrelations between chronic conditions. *PloS One* 2010;5(12):e15941.
34. Pati S, Swain S, Hussain MA, et al. Prevalence and outcomes of multimorbidity in South Asia: a systematic review. *BMJ Open* 2015;5(10):e007235.
35. Vancampfort D, Koyanagi A, Ward PB, et al. Chronic physical conditions, multimorbidity and physical activity across 46 low-and middle-income countries. *International Journal of Behavioral Nutrition and Physical Activity* 2017;14(1):6.
36. Gross R, Bentur N, Elhayany A, et al. The validity of self-reports on chronic disease: characteristics of underreporters and implications for the planning of services. *Public health reviews* 1996;24(2):167-82.
37. Palladino R, Tayu Lee J, Ashworth M, et al. Associations between multimorbidity, healthcare utilisation and health status: evidence from 16 European countries. *Age Ageing* 2016;45(3):431-5.
38. Brasil. Instituto Brasileiro de Geografia e Estatística (IBGE). Censo demográfico de 2010. Amazonas [Available from: <http://www.censo2010.ibge.gov.br/sinopse/index.php?uf=13&dados=4>. accessed 20/01/2016.
39. de Carvalho JN, Roncalli ÂG, de Camargo Cancela M, et al. Prevalence of multimorbidity in the Brazilian adult population according to socioeconomic and demographic characteristics. *PloS One* 2017;12(4):e0174322.
40. Nunes BP, Camargo-Figuera FA, Guttier M, et al. Multimorbidity in adults from a southern Brazilian city: occurrence and patterns. *International Journal of Public Health* 2016;61(9):1013-20.
41. Araújo MEA, Silva MT, Andrade KRC, et al. Prevalence of health services utilization in Brazil: a systematic review and meta-analysis. *Epidemiol Serv Saude* 2017;26(3):587-602.
42. Malta DC, Bernal RTI, de Souza MdFM, et al. Social inequalities in the prevalence of self-reported chronic non-communicable diseases in Brazil: national health survey 2013. *International Journal for Equity in Health* 2016;15(1):153.
43. Pati S, Agrawal S, Swain S, et al. Non communicable disease multimorbidity and associated health care utilization and expenditures in India: cross-sectional study. *BMC Health Services Research* 2014;14(1):451.
44. Pathirana TI, Jackson CA. Socioeconomic status and multimorbidity: a systematic review and meta-analysis. *Australian and New Zealand Journal of Public Health* 2018;42(2):186-94.
45. Machado CV, Lima LDD, Baptista TWdF. Health policies in Brazil in times of contradiction: paths and pitfalls in the construction of a universal system. *Cadernos de saude publica* 2017;33
46. Stuckler D, Reeves A, Loopstra R, et al. Austerity and health: the impact in the UK and Europe. *European Journal of Public Health* 2017;27(suppl\_4):18-21.
47. Kyriopoulos I-I, Zavras D, Skroumpelos A, et al. Barriers in access to healthcare services for chronic patients in times of austerity: an empirical approach in Greece. *International Journal for Equity in Health* 2014;13(1):54.

- 1  
2  
3 48. Tillmann T, Vaucher J, Okbay A, et al. Education and coronary heart disease:  
4 mendelian randomisation study. *BMJ (Clinical research ed)* 2017;358:j3542.  
5  
6 49. Harrison C, Britt H, Miller G, et al. Examining different measures of multimorbidity,  
7 using a large prospective cross-sectional study in Australian general practice. *BMJ*  
8 *Open* 2014;4(7):e004694.  
9  
10 50. Pang J, Hsu JP, Yeo TW, et al. Diabetes, cardiac disorders and asthma as risk factors  
11 for severe organ involvement among adult dengue patients: A matched case-control  
12 study. *Scientific reports* 2017;7:39872. doi: 10.1038/srep39872 [published Online  
13 First: 2017/01/04]  
14  
15 51. Mirza AMB, Fida M, Murtaza G, et al. Association of metabolic factors with dengue  
16 viral infection on admission triage which predict its clinical course during Lahore  
17 dengue epidemic. *JPMA* 2016;66(1102)  
18  
19 52. Toledo J, George L, Martinez E, et al. Relevance of non-communicable comorbidities  
20 for the development of the severe forms of dengue: a systematic literature review.  
21 *PLoS Neglected Tropical Diseases* 2016;10(1):e0004284.  
22  
23 53. Htun NSN, Odermatt P, Eze IC, et al. Is diabetes a risk factor for a severe clinical  
24 presentation of dengue?-review and meta-analysis. *PLoS Neglected Tropical*  
25 *Diseases* 2015;9(4):e0003741.  
26  
27 54. Jackson CA, Dobson AJ, Tooth LR, et al. Lifestyle and socioeconomic determinants of  
28 multimorbidity patterns among mid-aged women: a longitudinal study. *PloS One*  
29 2016;11(6):e0156804.  
30  
31 55. Prados-Torres A, Poblador-Plou B, Calderón-Larrañaga A, et al. Multimorbidity  
32 patterns in primary care: interactions among chronic diseases using factor analysis.  
33 *PloS One* 2012;7(2):e32190.  
34  
35 56. Starfield B, Shi L, Macinko J. Contribution of primary care to health systems and  
36 health. *The Milbank quarterly* 2005;83(3):457-502. doi: 10.1111/j.1468-  
37 0009.2005.00409.x [published Online First: 2005/10/06]  
38  
39  
40  
41  
42  
43  
44  
45  
46  
47  
48  
49  
50  
51  
52  
53  
54  
55  
56  
57  
58  
59  
60

1  
2  
3  
4  
5  
6  
7  
8  
9  
10  
11  
12  
13  
14  
15  
16  
17  
18  
19  
20  
21  
22  
23  
24  
25  
26  
27  
28  
29  
30  
31  
32  
33  
34  
35  
36  
37  
38  
39  
40  
41  
42  
43  
44  
45  
46  
47  
48  
49  
50  
51  
52  
53  
54  
55  
56  
57  
58  
59  
60



Figure 1 Scree plot for women  
Note: The graph shows one factors before the inflection point in the curve (eigenvalue >1)  
143x104mm (300 x 300 DPI)



Figure 2 Scree plot for men

Note: The graph shows two factors before the inflection point in the curve (eigenvalue >1)

125x91mm (300 x 300 DPI)

**STROBE 2007 (v4) checklist of items to be included in reports of observational studies in epidemiology\***  
**Checklist for cohort, case-control, and cross-sectional studies (combined)**

| Section/Topic             | Item # | Recommendation                                                                                                                                                                                                                                                                                                                                                                                                                                                         | Reported on page # |
|---------------------------|--------|------------------------------------------------------------------------------------------------------------------------------------------------------------------------------------------------------------------------------------------------------------------------------------------------------------------------------------------------------------------------------------------------------------------------------------------------------------------------|--------------------|
| Title and abstract        | 1      | (a) Indicate the study's design with a commonly used term in the title or the abstract                                                                                                                                                                                                                                                                                                                                                                                 | 1                  |
|                           |        | (b) Provide in the abstract an informative and balanced summary of what was done and what was found                                                                                                                                                                                                                                                                                                                                                                    | 1,2                |
| <b>Introduction</b>       |        |                                                                                                                                                                                                                                                                                                                                                                                                                                                                        |                    |
| Background/rationale      | 2      | Explain the scientific background and rationale for the investigation being reported                                                                                                                                                                                                                                                                                                                                                                                   | 3                  |
| Objectives                | 3      | State specific objectives, including any pre-specified hypotheses                                                                                                                                                                                                                                                                                                                                                                                                      | 3                  |
| <b>Methods</b>            |        |                                                                                                                                                                                                                                                                                                                                                                                                                                                                        |                    |
| Study design              | 4      | Present key elements of study design early in the paper                                                                                                                                                                                                                                                                                                                                                                                                                | 3,4                |
| Setting                   | 5      | Describe the setting, locations, and relevant dates, including periods of recruitment, exposure, follow-up, and data collection                                                                                                                                                                                                                                                                                                                                        | 4                  |
| Participants              | 6      | (a) <i>Cohort study</i> —Give the eligibility criteria, and the sources and methods of selection of participants. Describe methods of follow-up<br><i>Case-control study</i> —Give the eligibility criteria, and the sources and methods of case ascertainment and control selection. Give the rationale for the choice of cases and controls<br><i>Cross-sectional study</i> —Give the eligibility criteria, and the sources and methods of selection of participants | 4                  |
|                           |        | (b) <i>Cohort study</i> —For matched studies, give matching criteria and number of exposed and unexposed<br><i>Case-control study</i> —For matched studies, give matching criteria and the number of controls per case                                                                                                                                                                                                                                                 | -                  |
| Variables                 | 7      | Clearly define all outcomes, exposures, predictors, potential confounders, and effect modifiers. Give diagnostic criteria, if applicable                                                                                                                                                                                                                                                                                                                               | 4                  |
| Data sources/ measurement | 8*     | For each variable of interest, give sources of data and details of methods of assessment (measurement). Describe comparability of assessment methods if there is more than one group                                                                                                                                                                                                                                                                                   | 4                  |
| Bias                      | 9      | Describe any efforts to address potential sources of bias                                                                                                                                                                                                                                                                                                                                                                                                              | -                  |
| Study size                | 10     | Explain how the study size was arrived at                                                                                                                                                                                                                                                                                                                                                                                                                              | 4                  |
| Quantitative variables    | 11     | Explain how quantitative variables were handled in the analyses. If applicable, describe which groupings were chosen and why                                                                                                                                                                                                                                                                                                                                           | 4                  |
| Statistical methods       | 12     | (a) Describe all statistical methods, including those used to control for confounding                                                                                                                                                                                                                                                                                                                                                                                  | 5                  |
|                           |        | (b) Describe any methods used to examine subgroups and interactions                                                                                                                                                                                                                                                                                                                                                                                                    | -                  |
|                           |        | (c) Explain how missing data were addressed                                                                                                                                                                                                                                                                                                                                                                                                                            | -                  |
|                           |        | (d) <i>Cohort study</i> —If applicable, explain how loss to follow-up was addressed<br><i>Case-control study</i> —If applicable, explain how matching of cases and controls was addressed                                                                                                                                                                                                                                                                              | 4                  |

|                          |     |                                                                                                                                                                                                              |             |
|--------------------------|-----|--------------------------------------------------------------------------------------------------------------------------------------------------------------------------------------------------------------|-------------|
|                          |     | <i>Cross-sectional study</i> —If applicable, describe analytical methods taking account of sampling strategy                                                                                                 |             |
|                          |     | (e) Describe any sensitivity analyses                                                                                                                                                                        | -           |
| <b>Results</b>           |     |                                                                                                                                                                                                              |             |
| Participants             | 13* | (a) Report numbers of individuals at each stage of study—eg numbers potentially eligible, examined for eligibility, confirmed eligible, included in the study, completing follow-up, and analysed            | 6           |
|                          |     | (b) Give reasons for non-participation at each stage                                                                                                                                                         | -           |
|                          |     | (c) Consider use of a flow diagram                                                                                                                                                                           | -           |
| Descriptive data         | 14* | (a) Give characteristics of study participants (eg demographic, clinical, social) and information on exposures and potential confounders                                                                     | 6           |
|                          |     | (b) Indicate number of participants with missing data for each variable of interest                                                                                                                          | -           |
|                          |     | (c) <i>Cohort study</i> —Summarise follow-up time (eg, average and total amount)                                                                                                                             | -           |
| Outcome data             | 15* | <i>Cohort study</i> —Report numbers of outcome events or summary measures over time                                                                                                                          | -           |
|                          |     | <i>Case-control study</i> —Report numbers in each exposure category, or summary measures of exposure                                                                                                         | -           |
|                          |     | <i>Cross-sectional study</i> —Report numbers of outcome events or summary measures                                                                                                                           | 6           |
| Main results             | 16  | (a) Give unadjusted estimates and, if applicable, confounder-adjusted estimates and their precision (eg, 95% confidence interval). Make clear which confounders were adjusted for and why they were included | 7,8,9,10,11 |
|                          |     | (b) Report category boundaries when continuous variables were categorized                                                                                                                                    | 6           |
|                          |     | (c) If relevant, consider translating estimates of relative risk into absolute risk for a meaningful time period                                                                                             | -           |
| Other analyses           | 17  | Report other analyses done—eg analyses of subgroups and interactions, and sensitivity analyses                                                                                                               | 12,13       |
| <b>Discussion</b>        |     |                                                                                                                                                                                                              |             |
| Key results              | 18  | Summarise key results with reference to study objectives                                                                                                                                                     | 13,14       |
| Limitations              | 19  | Discuss limitations of the study, taking into account sources of potential bias or imprecision. Discuss both direction and magnitude of any potential bias                                                   | 14          |
| Interpretation           | 20  | Give a cautious overall interpretation of results considering objectives, limitations, multiplicity of analyses, results from similar studies, and other relevant evidence                                   | 14,15,16    |
| Generalisability         | 21  | Discuss the generalisability (external validity) of the study results                                                                                                                                        | 16          |
| <b>Other information</b> |     |                                                                                                                                                                                                              |             |
| Funding                  | 22  | Give the source of funding and the role of the funders for the present study and, if applicable, for the original study on which the present article is based                                                | 17          |

\*Give information separately for cases and controls in case-control studies and, if applicable, for exposed and unexposed groups in cohort and cross-sectional studies.

**Note:** An Explanation and Elaboration article discusses each checklist item and gives methodological background and published examples of transparent reporting. The STROBE checklist is best used in conjunction with this article (freely available on the Web sites of PLoS Medicine at <http://www.plosmedicine.org/>, Annals of Internal Medicine at <http://www.annals.org/>, and Epidemiology at <http://www.epidem.com/>). Information on the STROBE Initiative is available at [www.strobe-statement.org](http://www.strobe-statement.org).
